# Supplementary material for: Phylogenomic Investigation of Phospholipid Synthesis in Archaea
Source: Hindawi journal article supplement (doi:10.1155/2012/630910), 2012-01-01

## Supplementary Material

### **Phylogenomic Investigation of Phospholipid Synthesis in Archaea**

**Jonathan Lombard, Purificación López-García, and David Moreira**

SUPPLEMENTARY TABLE 1: Species used in similarity searches

SUPPLEMENTARY FIGURE 1: Complete short-chain IPPS phylogeny.

SUPPLEMENTARY FIGURE 2: Complete long-chain IPPS phylogeny.

SUPPLEMENTARY FIGURE 3: GGGPS phylogeny.

SUPPLEMENTARY FIGURE 4: DGGGPS phylogeny.

SUPPLEMENTARY FIGURE 5: Phylogenetic tree of CDP alcohol phosphatidyltransferases probably related to serine transfer.

SUPPLEMENTARY FIGURE 6: Phylogenetic tree of CDP alcohol phosphatidyltransferases probably related to *myo*-inositol transfer.

SUPPLEMENTARY FIGURE 7: Phylogenetic tree of geranylgeranyl reductases (GGR).

SUPPLEMENTARY FIGURE 8: Phylogenetic tree of CDP diglyceride synthases (CdsA).

SUPPLEMENTARY TABLE 1: Species used in similarity searches

|                 |                                                                                                                                                                                                                                                                                                                                                                                                                                                                                                                                                                                                                                                                                                                                                                                                                                                                                                                                                                                                                                                                                                                                                                                                                                                                                                                                                                                                                                                                                                                                                                                                                                                                                                                                                                                                                                                                                                                                                                                                                                                                                                                                                                                                                                                                                                                                                                                                                                                         |
|-----------------|---------------------------------------------------------------------------------------------------------------------------------------------------------------------------------------------------------------------------------------------------------------------------------------------------------------------------------------------------------------------------------------------------------------------------------------------------------------------------------------------------------------------------------------------------------------------------------------------------------------------------------------------------------------------------------------------------------------------------------------------------------------------------------------------------------------------------------------------------------------------------------------------------------------------------------------------------------------------------------------------------------------------------------------------------------------------------------------------------------------------------------------------------------------------------------------------------------------------------------------------------------------------------------------------------------------------------------------------------------------------------------------------------------------------------------------------------------------------------------------------------------------------------------------------------------------------------------------------------------------------------------------------------------------------------------------------------------------------------------------------------------------------------------------------------------------------------------------------------------------------------------------------------------------------------------------------------------------------------------------------------------------------------------------------------------------------------------------------------------------------------------------------------------------------------------------------------------------------------------------------------------------------------------------------------------------------------------------------------------------------------------------------------------------------------------------------------------|
| <b>Bacteria</b> | <i>Acaryochloris marina</i> MBIC11017<br><i>Acholeplasma laidlawii</i> PG-8A<br><i>Acidimicrobium ferrooxidans</i> DSM 10331<br><i>Acidithiobacillus ferrooxidans</i> ATCC 53993<br><i>Acidobacterium capsulatum</i> ATCC 51196<br><i>Acidovorax citrulli</i> AAC00-1<br><i>Acinetobacter johnsonii</i> SH046<br><i>Actinobacillus pleuropneumoniae</i><br><i>Actinomyces coleocanis</i> DSM 15436<br><i>Aeromonas hydrophila</i><br><i>Akkermansia muciniphila</i> ATCC BAA-835<br><i>Algoriphagus</i> sp. PR1<br><i>Alicyclobacillus acidocaldarius</i><br><i>Alkaliphilus metalliredigens</i><br><i>Alteromonas macleodii</i> ATCC 27126<br><i>Aminobacterium colombiense</i> DSM 12261<br><i>Aminomonas paucivorans</i><br><i>Anabaena variabilis</i><br><i>Anaerobaculum hydrogeniformans</i><br><i>Anaerolinea thermophila</i><br><i>Anaplasma marginale</i> str. Florida<br><i>Aquifex aeolicus</i> VF5<br><i>Arcobacter butzleri</i> RM4018<br><i>Arthrospira maxima</i><br><i>Atopobium parvum</i> DSM 20469<br><i>Bacillus subtilis</i> BSn5<br><i>Bacteroides uniformis</i> ATCC 8492<br><i>Bdellovibrio bacteriovorus</i> HD100<br><i>Bifidobacterium adolescentis</i><br><i>Blastopirellula marina</i> DSM 3645<br><i>Bordetella bronchiseptica</i> RB50<br><i>Borrelia burgdorferi</i> 118a<br><i>Brachyspira murdochii</i> DSM 12563<br><i>Brevibacterium linens</i> BL2<br><i>Brevundimonas subvibrioides</i> ATCC 15264<br><i>Burkholderia cenocepacia</i> HI2424<br><i>Calditerrivibrio nitroreducens</i><br><i>Caminiibacter mediatlanticus</i> TB-2<br><i>Campylobacter gracilis</i> RM3268<br><i>Candidatus Koribacter versatilis</i> Ellin345<br><i>Candidatus Nitrospira defluvii</i><br><i>Candidatus Phytoplasma australiense</i><br><i>Candidatus Solibacter usitatus</i> Ellin6076<br><i>Carboxydotherrmus hydrogenoformans</i><br><i>Carnobacterium</i> sp. AT7<br><i>Caulobacter crescentus</i> CB15<br><i>Chlamydia trachomatis</i> 434/Bu<br><i>Chlamydophila pneumoniae</i> AR39<br><i>Chlorobaculum parvum</i><br><i>Chlorobium limicola</i><br><i>Chlorobium luteolum</i> DSM 273<br><i>Chlorobium tepidum</i> TLS<br><i>Chloroflexus aurantiacus</i><br><i>Chloroherpeton thalassium</i> ATCC 35110<br><i>Chthoniobacter flavus</i> Ellin428<br><i>Collinsella aerofaciens</i><br><i>Coprococcus eutactus</i><br><i>Coralimargarita akajimensis</i> DSM 45221<br><i>Crocospaera watsonii</i><br><i>Cyanobium</i> sp. |
|-----------------|---------------------------------------------------------------------------------------------------------------------------------------------------------------------------------------------------------------------------------------------------------------------------------------------------------------------------------------------------------------------------------------------------------------------------------------------------------------------------------------------------------------------------------------------------------------------------------------------------------------------------------------------------------------------------------------------------------------------------------------------------------------------------------------------------------------------------------------------------------------------------------------------------------------------------------------------------------------------------------------------------------------------------------------------------------------------------------------------------------------------------------------------------------------------------------------------------------------------------------------------------------------------------------------------------------------------------------------------------------------------------------------------------------------------------------------------------------------------------------------------------------------------------------------------------------------------------------------------------------------------------------------------------------------------------------------------------------------------------------------------------------------------------------------------------------------------------------------------------------------------------------------------------------------------------------------------------------------------------------------------------------------------------------------------------------------------------------------------------------------------------------------------------------------------------------------------------------------------------------------------------------------------------------------------------------------------------------------------------------------------------------------------------------------------------------------------------------|

*Cyanothece* sp. ATCC 51142  
*Cytophaga hutchinsonii* ATCC 33406  
*Dechloromonas aromatica*  
*Deferribacter desulfuricans*  
*Dehalococcoides ethenogenes* 195  
*Dehalogenimonas lykanthroporepellens* BL-DC-9  
*Deinococcus geothermalis*  
*Deinococcus radiodurans*  
*Denitrovibrio acetiphilus*  
*Desulfarculus baarsii* DSM 2075  
*Desulfatibacillum alkenivorans* AK-01  
*Desulfococcus oleovorans* Hxd3  
*Desulfohalobium retbaense* DSM 5692  
*Desulfurispirillum indicum*  
*Dethiosulfovibrio peptidovorans* DSM 11002  
*Dictyoglomus thermophilum*  
*Dictyoglomus turgidum* DSM 6724  
*Dokdonia donghaensis* MED134  
*Elusimicrobium minutum*  
*Enterobacter sakazakii* ATCC BAA-894  
*Enterococcus faecalis*  
*Escherichia coli* O157:H7 str. EC4024  
*Eubacterium dolichum*  
*Fervidobacterium nodosum* Rt17-B1  
*Fibrobacter succinogenes*  
*Flavobacterium johnsoniae*  
*Francisella tularensis*  
*Frankia alni* ACN14a  
*Fusobacterium nucleatum* subsp. *nucleatum*  
ATCC 23726  
*Gallionella capsiferriformans* ES-2  
*Gemmata obscuriglobus* UQM 2246  
*Gemmatimonas aurantiaca* T-27  
*Geobacter metallireducens* GS-15  
*Gloeobacter violaceus* PCC 7421  
*Halomonas elongata* DSM 2581  
*Helicobacter pylori* B38  
*Heliobacterium modesticaldum*  
*Herpetosiphon aurantiacus*  
*Hydrogenivirga* sp. 128-5-R1-1  
*Hydrogenobaculum* sp. Y04AAS1  
*Ilyobacter polytropus* DSM 2926  
*Isosphaera pallida* ATCC 43644  
*Kosmotoga olearia* TBF 19.5.1  
*Ktedonobacter racemifer* DSM 44963  
*Lactococcus lactis* subsp. *cremoris* MG1363  
*Lawsonia intracellularis* PHE/MN1-00  
*Lentisphaera araneosa*  
*Leptolyngbya valderiana* BDU 20041  
*Leptospira interrogans*  
*Leptospirillum ferrooxidans*  
*Leptotrichia hofstadii*  
*Magnetococcus* sp. MC-1  
*Maricaulis maris* MCS10  
*Marinitoga piezophila* KA3  
*Mariprofundus ferrooxydans* PV-1  
*Meiothermus ruber* DSM 1279  
*Meiothermus silvanus* DSM 9946  
*Mesoplasma florum* L1  
*Methylibium petroleiphilum* PM1  
*Methylobacillus flagellatus* KT  
*Microscilla marina*

*Mitsuokella multacida*  
*Moorella thermoacetica*  
*Mycoplasma agalactiae* PG2  
*Mycoplasma pneumoniae* M129  
*Myxococcus xanthus* DK 1622  
*Nautilia profundicola* AmH  
*Neisseria elongata* ATCC 29315  
*Nitratifractor salsuginis*  
*Nitratiruptor* sp. SB155-2  
*Nitrosomonas eutropha* C91  
*Nostoc punctiforme* PCC 73102  
*Oceanithermus profundus*  
*Opitutus terrae* PB90-1  
*Parachlamydia acanthamoebae* str. Hall's coccus  
*Pasteurella multocida* subsp. *multocida* str. Pm70  
*Pedobacter* sp. BAL39  
*Persephonella marina*  
*Petrogla mobilis* SJ95  
*Photobacterium angustum* S14  
*Pirellula staleyi* DSM 6068  
*Planctomyces limnophilus* DSM 3776  
*Porphyromonas gingivalis*  
*Prevotella amnii* CRIS 21A-A  
*Prochlorococcus marinus* str. AS9601  
*Prosthecochloris aestuarii* DSM 271  
*Pyramidobacter piscicola*  
*Ralstonia eutropha* H16  
*Rhizobium leguminosarum*  
*Rhodobacter sphaeroides*  
*Rhodopirellula baltica* SH 1  
*Rhodospirillum rubrum* ATCC 11170  
*Roseiflexus castenholzii* DSM 13941  
*Rubrobacter xylanophilus* DSM 9941  
*Salinibacter ruber* DSM 13855  
*Seibaldella termitidis* ATCC 33386  
*Solibacter usitatus* Ellin6076  
*Sphingomonas wittichii* RW1  
*Sphingopyxis alaskensis* RB2256  
*Spirochaeta smaragdinae* DSM 11293  
*Spiroplasma citri*  
*Stenotrophomonas maltophilia* K279a  
*Streptobacillus moniliformis* DSM 12112  
*Streptococcus agalactiae*  
*Sulfurihydrogenibium yellowstonense*  
*Sulfurimonas denitrificans* DSM 1251  
*Sulfurovum* sp. NBC37-1  
*Syntrophobacter fumaroxidans* MPOB  
*Syntrophus aciditrophicus* SB  
*Terriglobus saanensis* SP1PR4  
*Thermanaerovibrio acidaminovorans*  
*Thermocrinis albus* DSM 14484  
*Thermodesulfobacterium yellowstonii* DSM 11347  
*Thermomicrobium roseum*  
*Thermosipho africanus* TCF52B  
*Thermotoga maritima* MSB8  
*Thermovibrio ammonificans*  
*Thermus thermophilus*  
*Thiobacillus denitrificans* ATCC 25259  
*Treponema brennaborensis* DSM 12168  
*Treponema denticola* ATCC 35405  
*Truepera radiovictrix*  
*Ureaplasma parvum* serovar 1 str. ATCC 27813

*Verrucomicrobium spinosum* DSM 4136  
*Victivallis vadensis*  
*Waddlia chondrophila* WSU 86-1044  
*Xanthobacter autotrophicus* Py2  
*Xanthomonas oryzae*

---

## Archaea

*Acidilobus saccharovorans* 345-15  
*Aciduliprofundum boonei* T469  
*Aeropyrum pernix* K1  
*Archaeoglobus fulgidus* DSM 4304  
*Archaeoglobus profundus* DSM 5631  
*Caldivirga maquilingensis* IC-167  
*Candidatus Caldiarchaeum subterraneum*  
*Candidatus Korarchaeum cryptofilum* OPF8  
*Candidatus Methanoregula boonei* 6A8  
*Cenarchaeum symbiosum* A  
*Desulfurococcus kamchatkensis* 1221n  
*Ferroglobus placidus* DSM 10642  
*Ferroplasma acidarmanus* fer1  
*Halalkalicoccus jeotgali* B3  
*Haloarcula marismortui* ATCC 43049  
*Halobacterium salinarum*  
*Haloferax volcanii* DS2  
*Halogeometricum borinquense* DSM 11551  
*Halomicrobium mukohataei* DSM 12286  
*Haloquadratum walsbyi* DSM 16790  
*Halorhabdus utahensis* DSM 12940  
*Halorubrum lacusprofundi* ATCC 49239  
*Haloterrigena turkmenica* DSM 5511  
*Hyperthermus butylicus* DSM 5456  
*Ignicoccus hospitalis* KIN4/I  
*Ignisphaera aggregans* DSM 17230  
*Metallosphaera sedula* DSM 5348  
*Methanobrevibacter ruminantium* M1  
*Methanobrevibacter smithii*  
*Methanocaldococcus fervens* AG86  
*Methanocaldococcus infernus* ME  
*Methanocaldococcus jannaschii* DSM 2661  
*Methanocaldococcus* sp. FS406-22  
*Methanocaldococcus vulcanius* M7  
*Methanocella paludicola* SANAE  
*Methanococcoides burtonii* DSM 6242  
*Methanococcoides burtonii* DSM 6242  
*Methanococcus aeolicus* Nankai-3  
*Methanococcus maripaludis*  
*Methanococcus vannieli* SB  
*Methanococcus voltae* A3  
*Methanocorpusculum labreanum* Z  
*Methanoculleus marisnigri* JR1  
*Methanohalobium evestigatum* Z-7303  
*Methanohalophilus mahii* DSM 5219  
*Methanoplanus petrolearius* DSM 11571  
*Methanopyrus kandleri* AV19  
*Methanosaeta thermophila* PT  
*Methanosarcina acetivorans* C2A  
*Methanosarcina barkeri* str. Fusaro  
*Methanosarcina mazei* Go1  
*Methanosphaera stadtmanae* DSM 3091  
*Methanosphaerula palustris* E1-9c  
*Methanospirillum hungatei* JF-1  
*Methanothermobacter marburgensis* str. Marburg  
*Methanothermobacter thermautotrophicus* Delta H  
*Methanothermococcus okinawensis* IH1

*Methanothermus fervidus*  
*Nanoarchaeum equitans* Kin4-M  
*Natrialba magadii* ATCC 43099  
*Natronomonas pharaonis* DSM 2160  
*Nitrosopumilus maritimus* SCM1  
*Picrophilus torridus* DSM 9790  
*Pyrobaculum aerophilum* str. IM2  
*Pyrobaculum arsenaticum* DSM 13514  
*Pyrobaculum calidifontis* JCM 11548  
*Pyrobaculum islandicum* DSM 4184  
*Pyrococcus abyssi* GE5  
*Pyrococcus furiosus* DSM 3638  
*Pyrococcus horikoshii* OT3  
*Staphylothermus hellenicus* DSM 12710  
*Staphylothermus marinus* F1  
*Sulfolobus acidocaldarius* DSM 639  
*Sulfolobus solfataricus* P2  
*Sulfolobus tokodaii* str. 7  
*Thermococcus barophilus* MP  
*Thermococcus gammatolerans* EJ3  
*Thermococcus kodakarensis* KOD1  
*Thermococcus onnurineus* NA1  
*Thermococcus sibiricus* MM 739  
*Thermococcus* sp. AM4  
*Thermofilum pendens* Hrk 5  
*Thermoplasma acidophilum* DSM 1728  
*Thermoplasma volcanium* GSS1  
*Thermoproteus neutrophilus* V24Sta  
*Thermoproteus tenax* Kra1  
*Thermosphaera aggregans* DSM 11486  
*Vulcanisaeta distributa* DSM 14429

---

## Eukaryotes

*Acanthamoeba castellanii*  
*Arabidopsis thaliana*  
*Aureococcus anophagefferens*  
*Babesia bovis* T2Bo  
*Bigelowiella natans*  
*Blastocladiella emersonii*  
*Bryopsis hypnoides*  
*Chlamydomonas reinhardtii*  
*Chlorella vulgaris*  
*Chlorokybus atmophyticus*  
*Chromera velia*  
*Chrysodidymus synuroideus*  
*Cryptococcus neoformans* var. *grubii*  
*Cryptomonas paramecium*  
*Cryptosporidium hominis* TU502  
*Cyanidioschyzon merolae*  
*Cyanophora paradoxa*  
*Desmarestia viridis*  
*Dictyostelium discoideum* AX4  
*Durinskia baltica*  
*Eimeria tenella* str. Houghton  
*Emiliana huxleyi*  
*Encephalitozoon cuniculi* GB-M1  
*Entamoeba histolytica* HM-1:IMSS  
*Euglena gracilis*  
*Giardia intestinalis*  
*Glaucocystis nostochinearum*  
*Glomus irregulare*  
*Gracilaria chilensis*  
*Guillardia theta*  
*Haemoproteus columbae*

*Hartmannella vermiformis*  
*Hemiselmis andersenii*  
*Igernella notabilis*  
*Kryptoperidinium foliaceum*  
*Leishmania major*  
*Leucocytozoon majoris*  
*Malawimonas jakobiformis*  
*Mesostigma viride*  
*Micromonas pusilla* CCMP1545  
*Monosiga brevicollis* ATCC 50154  
*Naegleria gruberi*  
*Nephroselmis olivacea*  
*Ochromonas danica*  
*Odontella sinensis*  
*Pan troglodytes verus*  
*Parahaemoproteus vireonis*  
*Paramecium tetraurelia* strain d4-2  
*Paulinella chromatophora*  
*Perkinsus marinus*  
*Phakopsora pachyrhizi*  
*Physarum polycephalum*  
*Phytophthora infestans* T30-4  
*Plasmodium falciparum* 3D7  
*Porphyra purpurea*  
*Reclinomonas americana*  
*Rhodomonas salina*  
*Saccharomyces cerevisiae* A364A  
*Schizosaccharomyces pombe* 972h  
*Staurostrum punctulatum*  
*Synedra acus* Cafeteria roenbergensis  
*Talaromyces stipitatus* ATCC 10500  
*Tetrahymena thermophila*  
*Thalassiosira oceanica* CCMP1005  
*Theileria annulata* strain Ankara  
*Toxoplasma gondii* ME49  
*Trichomonas vaginalis* G3  
*Trichoplax adhaerens*  
*Trypanosoma cruzi*  
*Ustilago maydis* 521

---



SUPPLEMENTARY FIGURE 1: Complete short-chain IPPS phylogeny reconstructed using 136 representative sequences and 244 conserved sites.

Suppl. Figure 1.

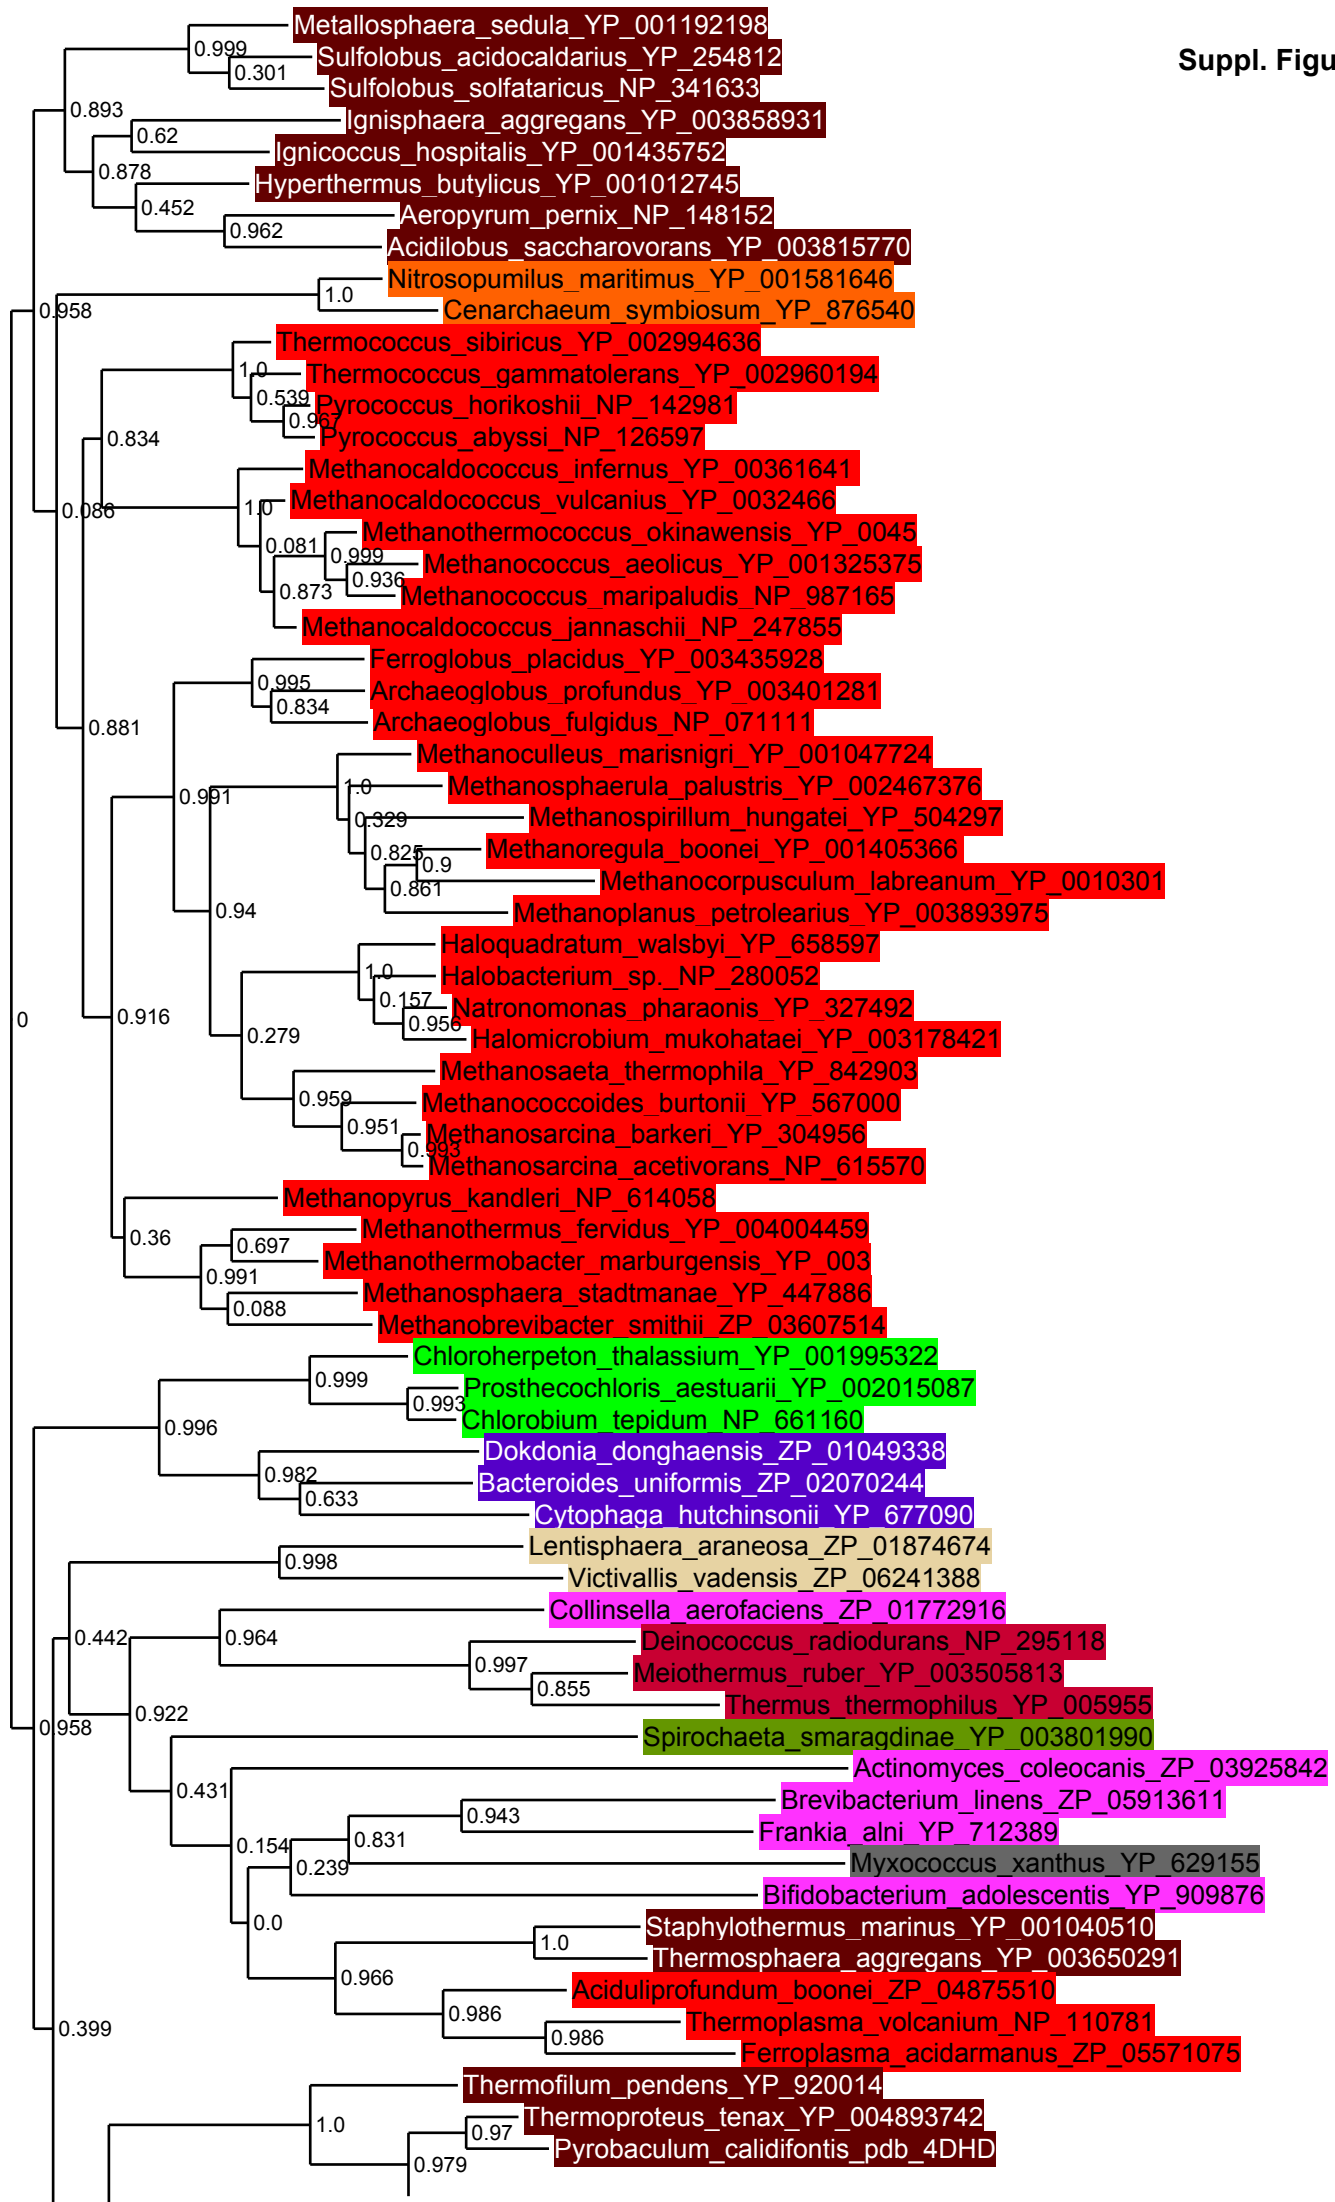

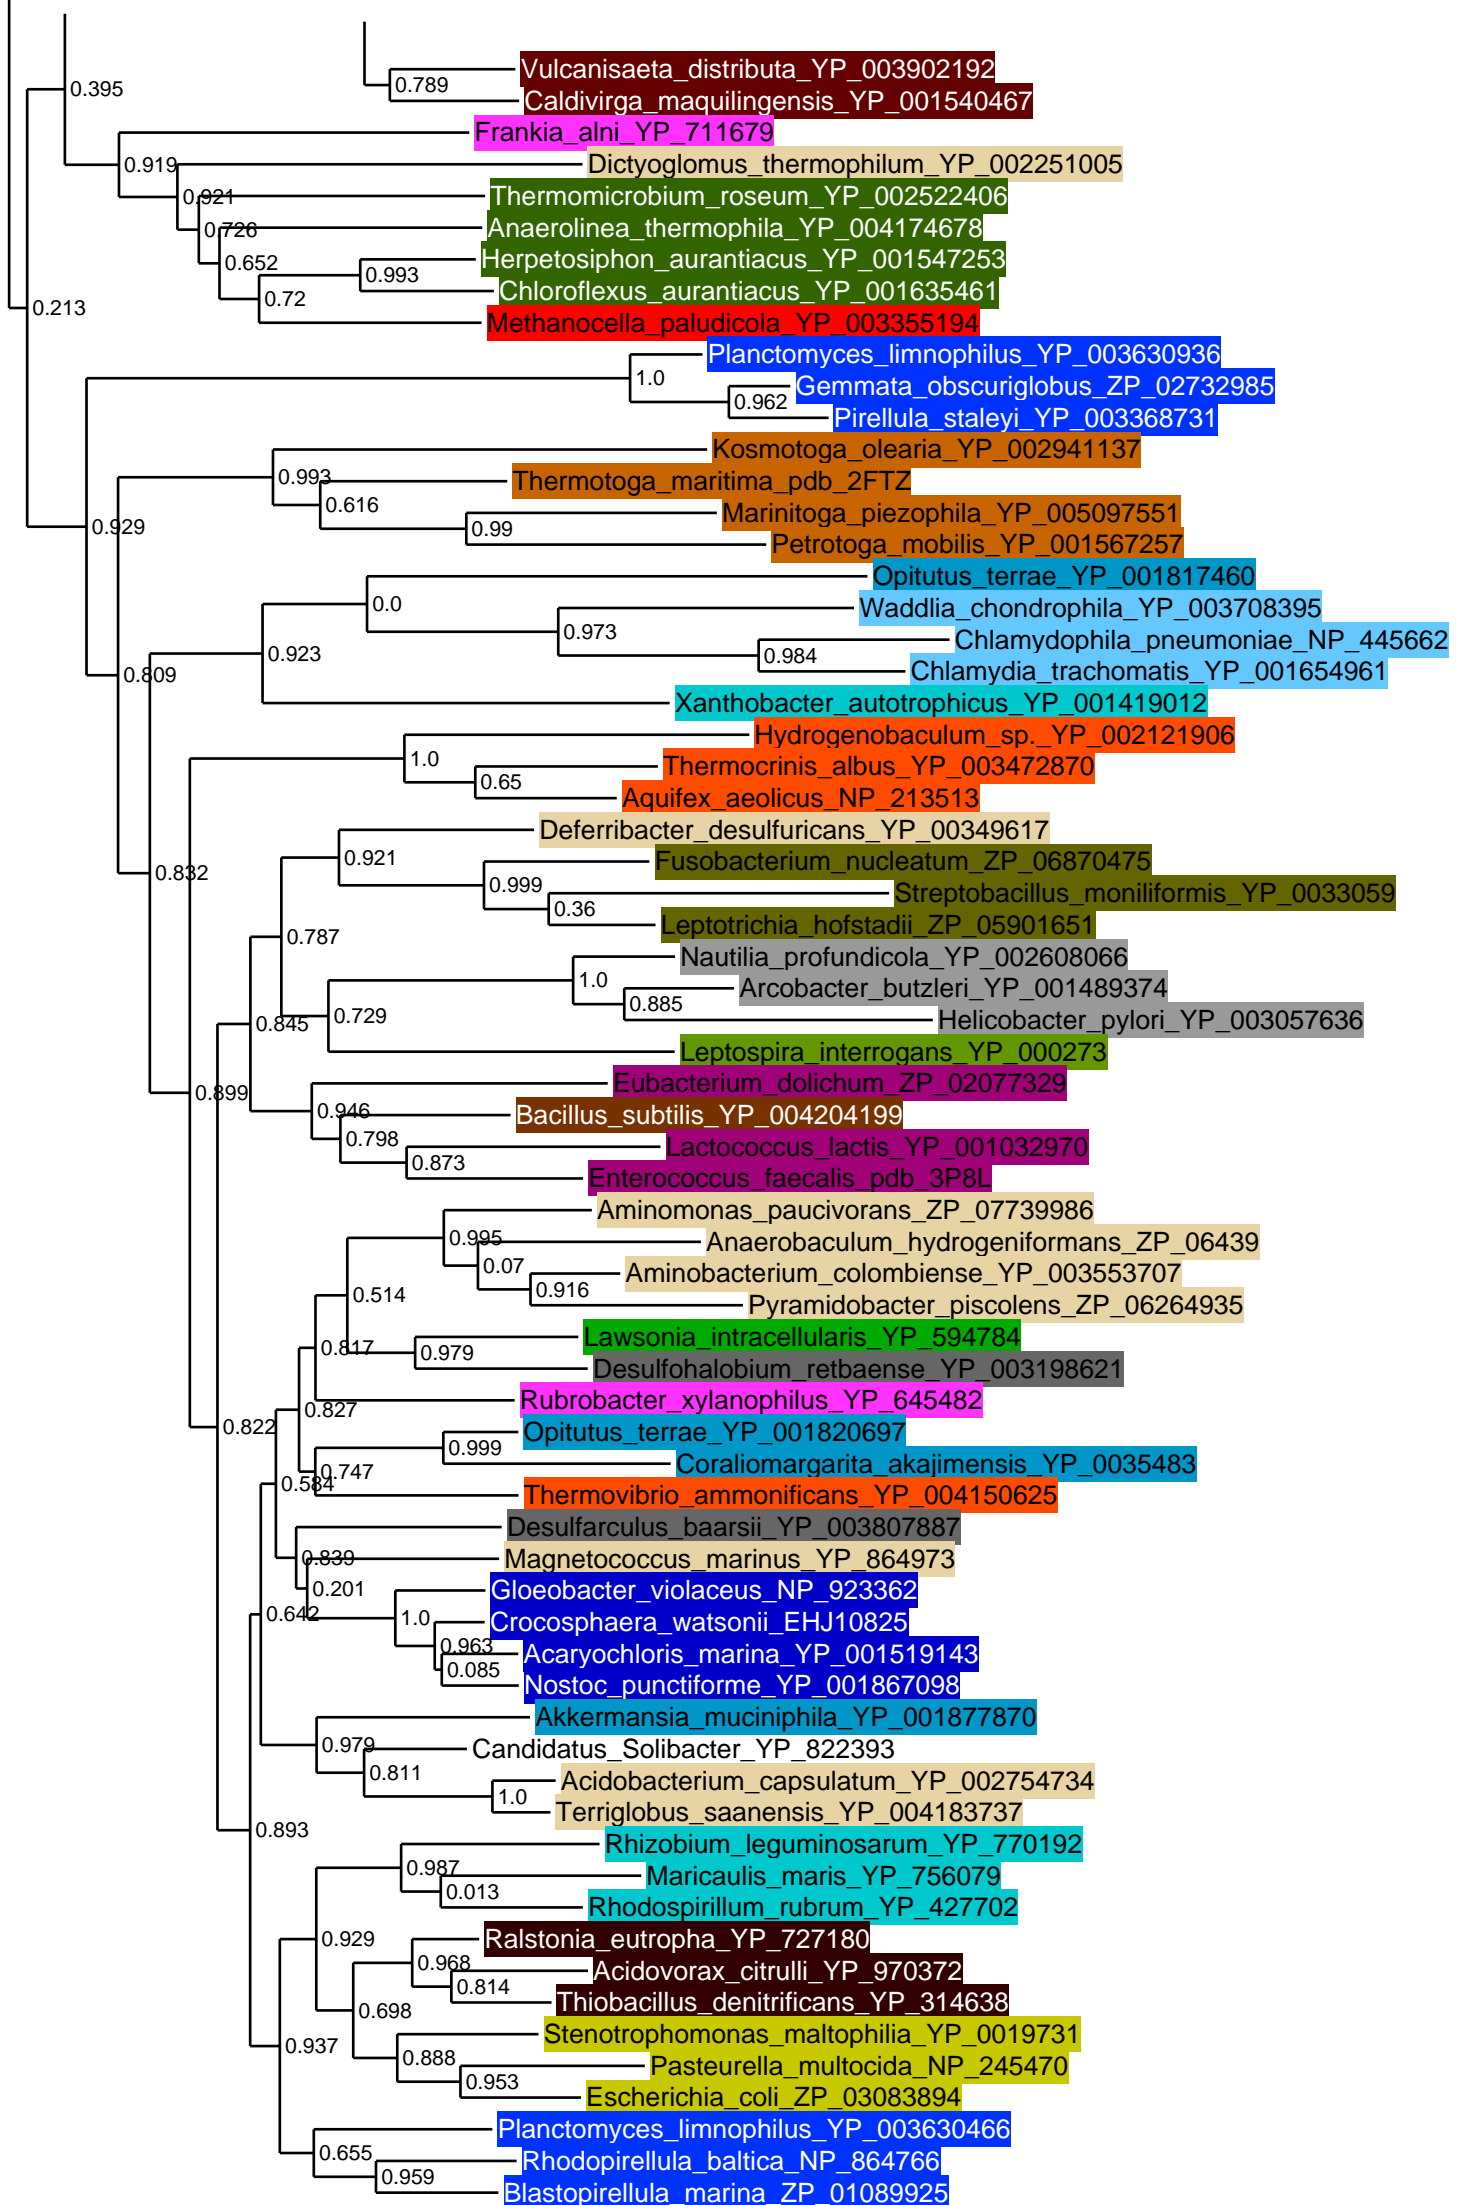

SUPPLEMENTARY FIGURE 2: Complete long-chain IPPS phylogeny reconstructed using 218 representative sequences and 241 conserved sites.

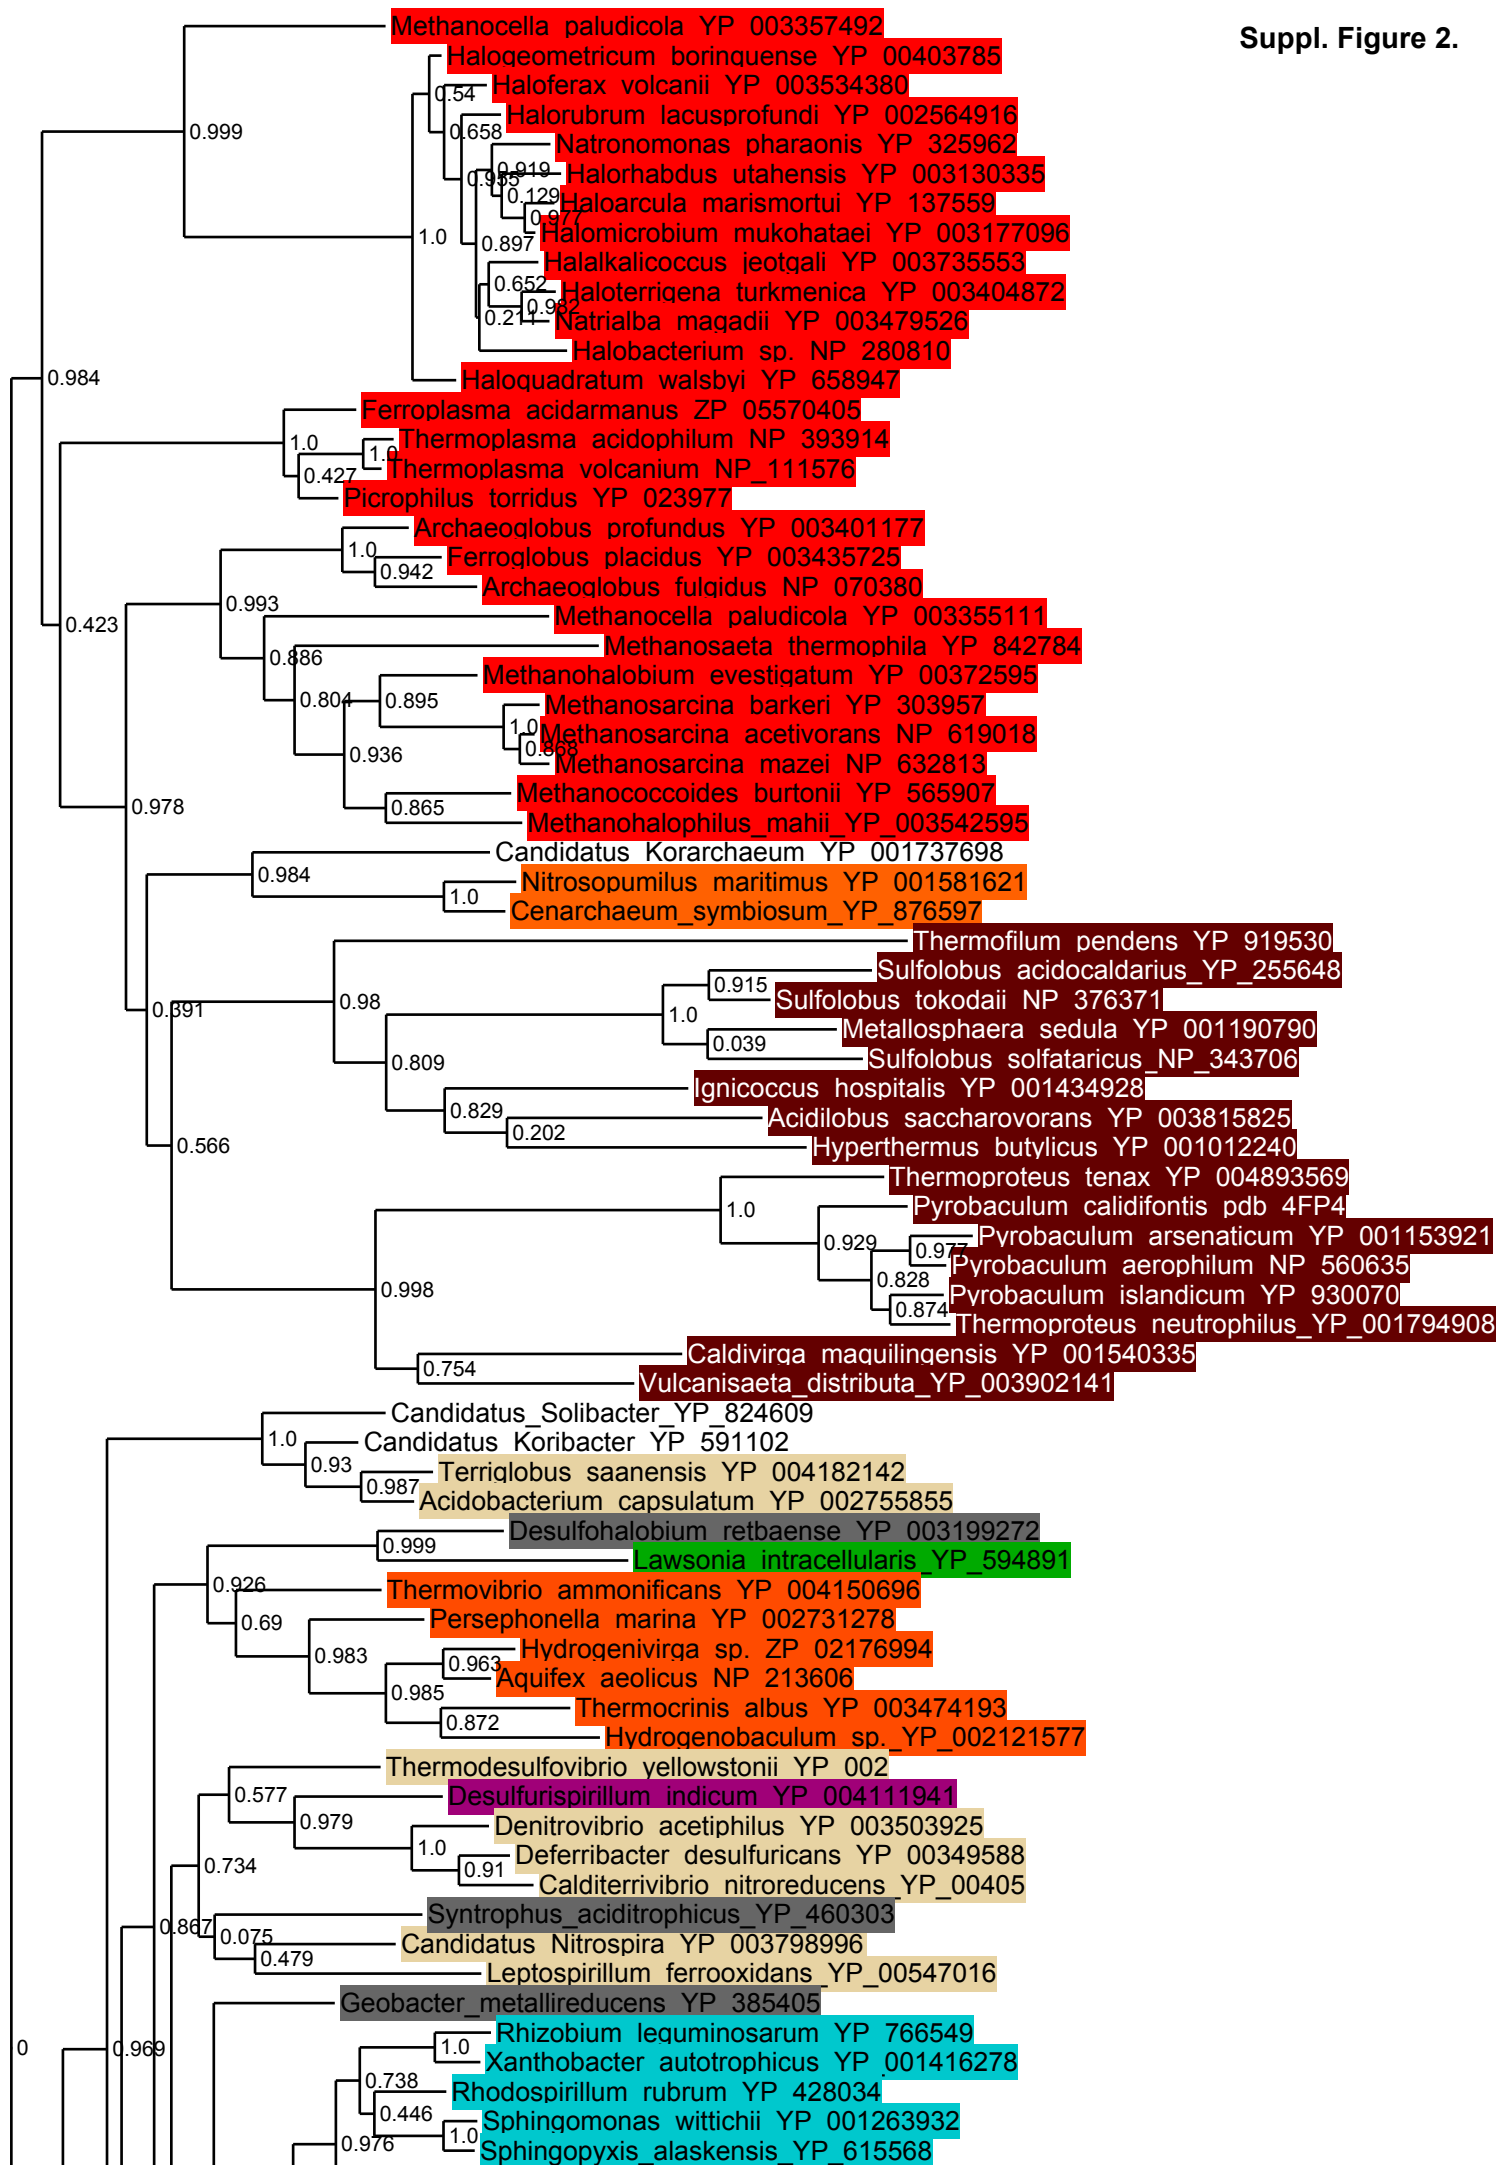

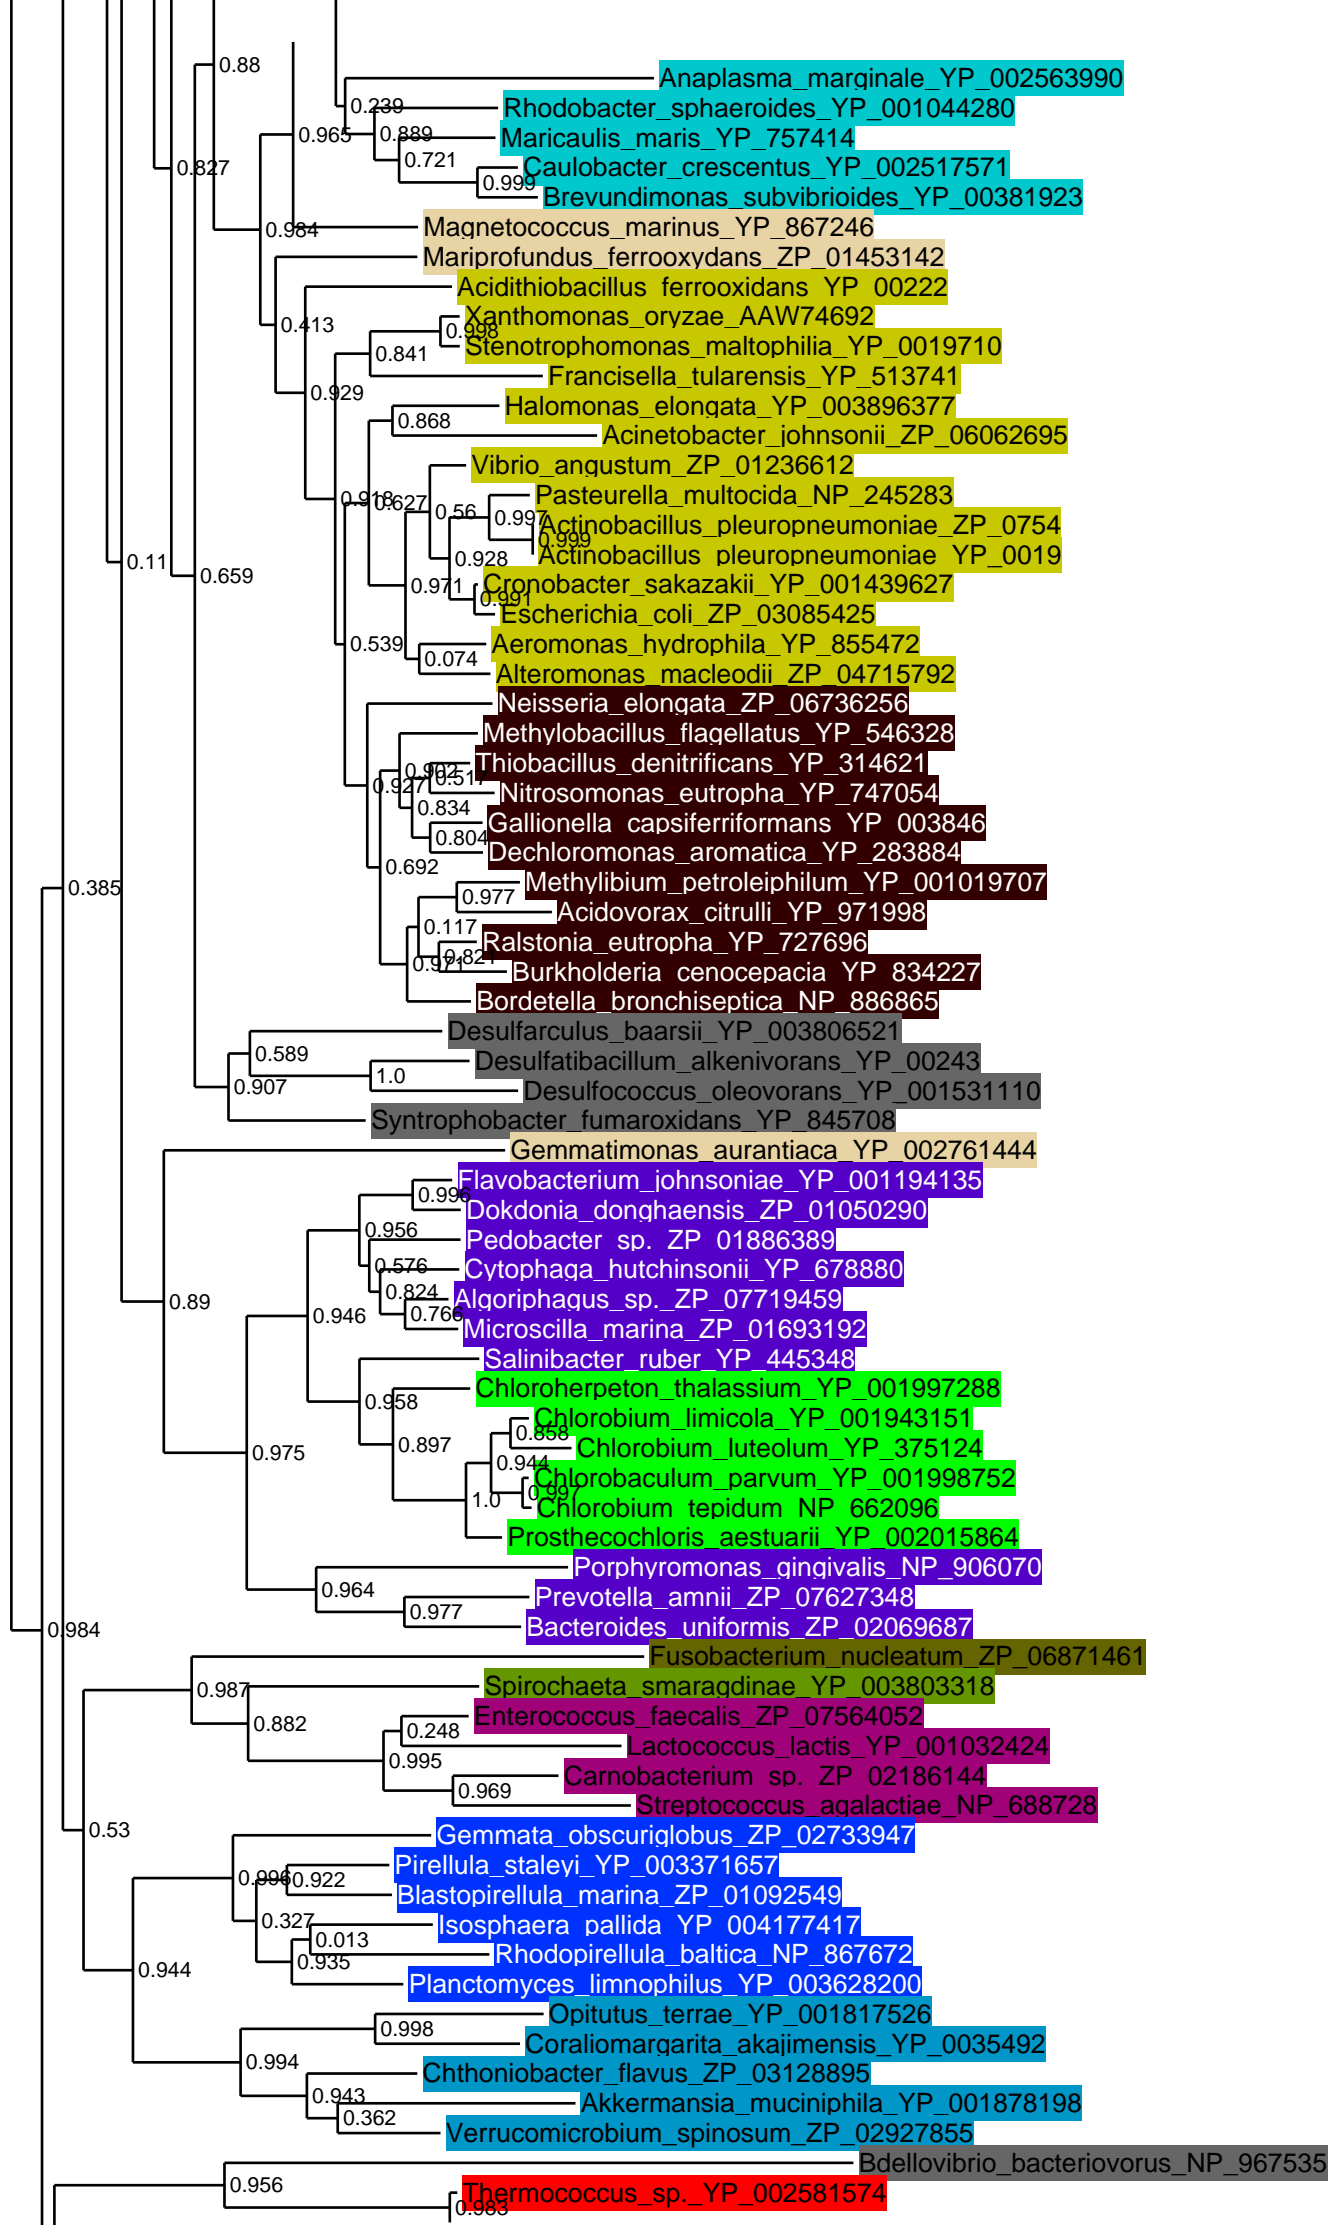

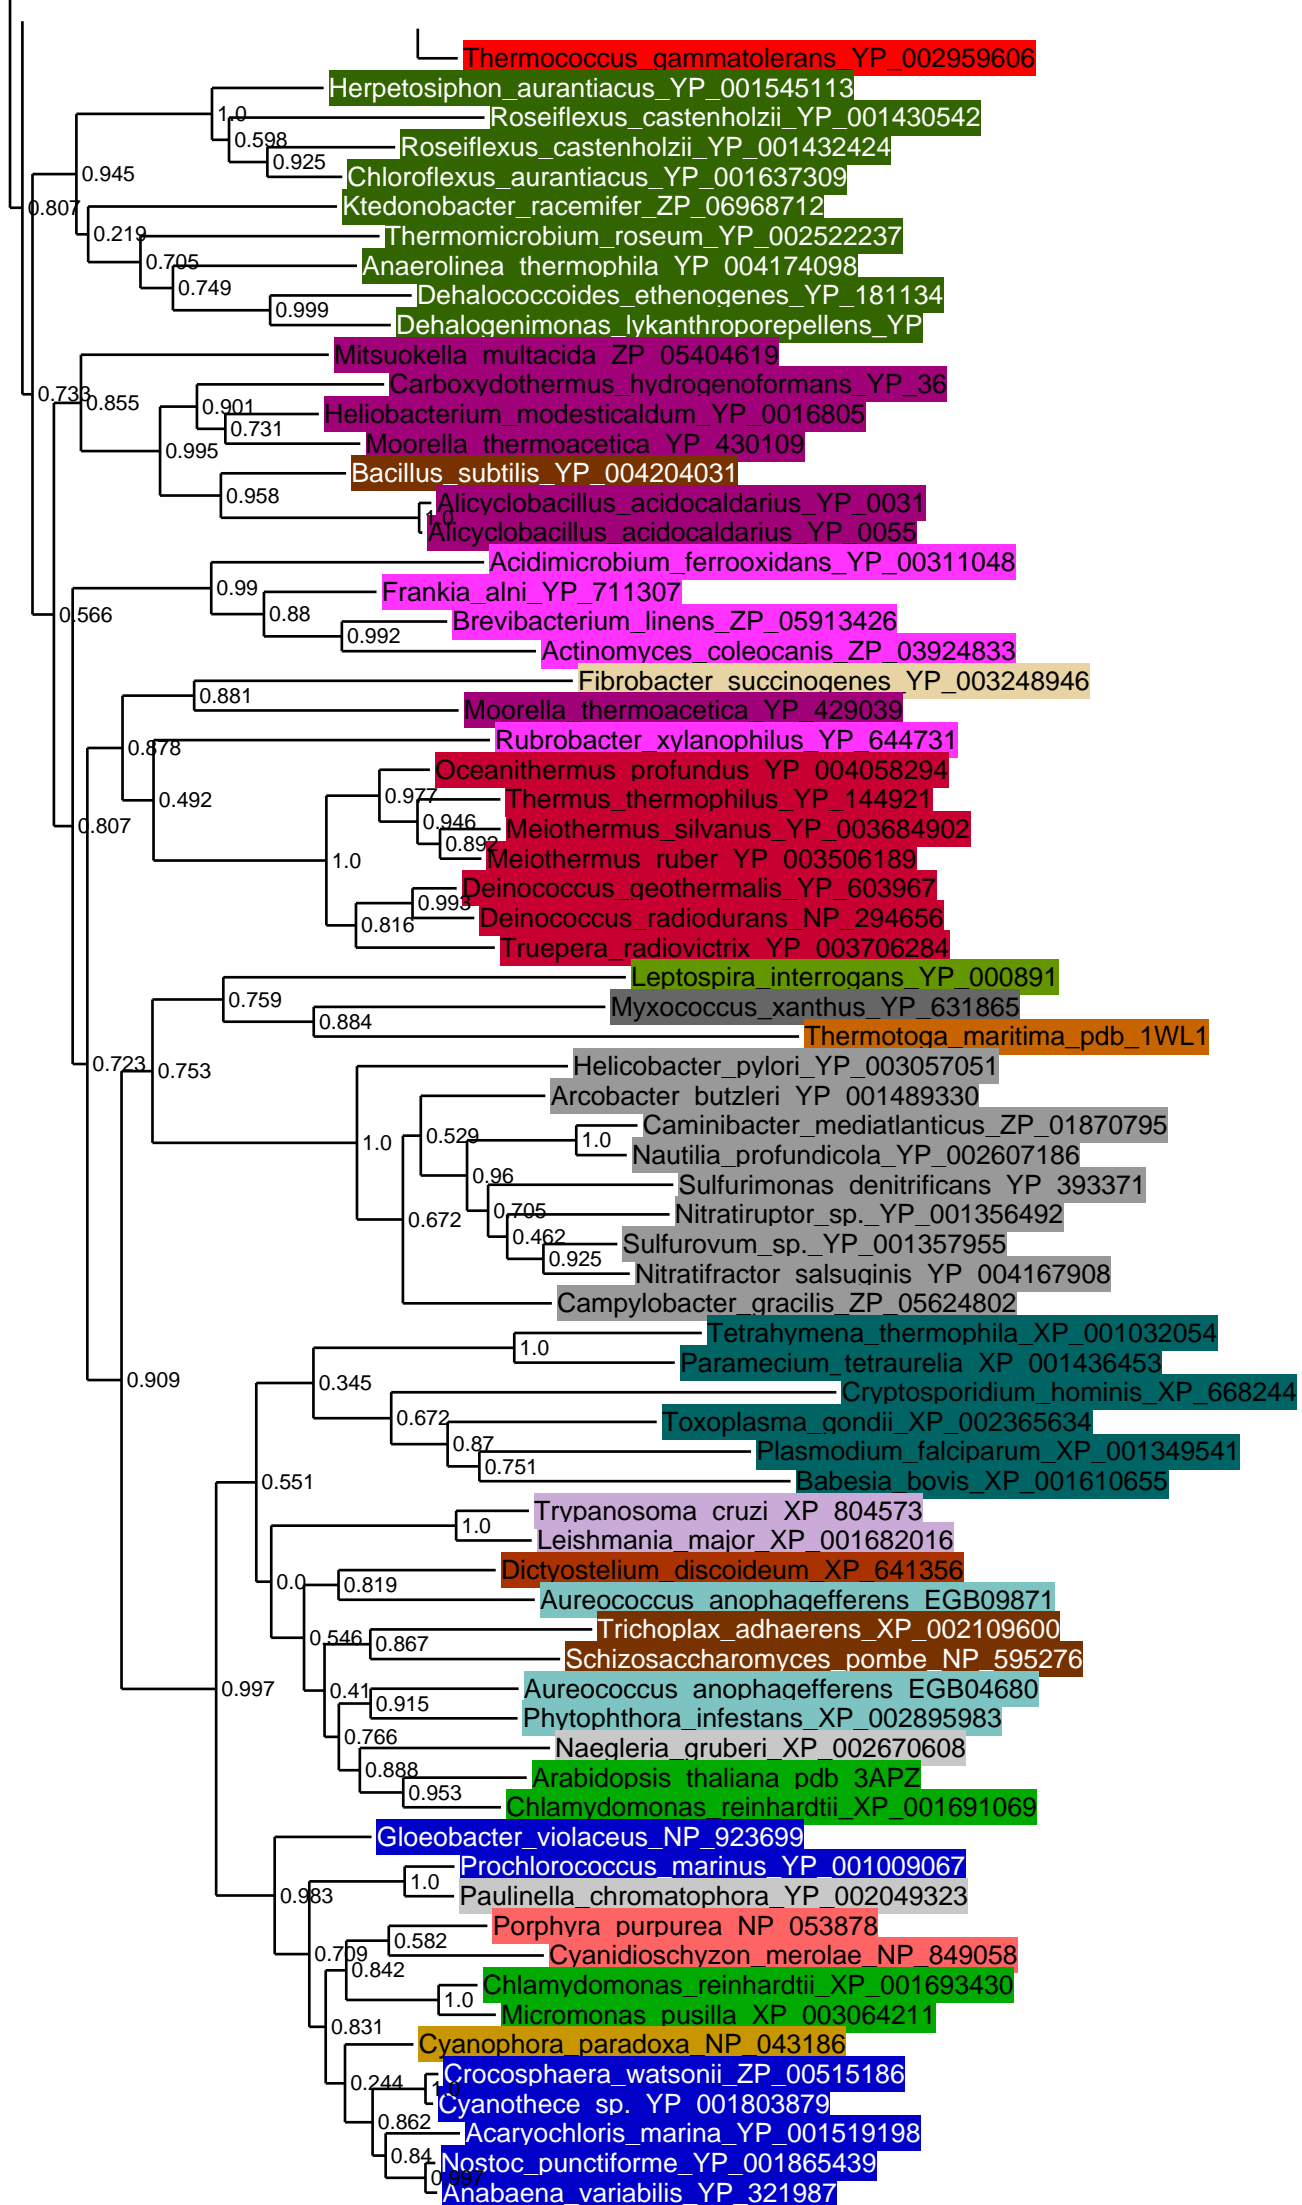

SUPPLEMENTARY FIGURE 3: GGGPS phylogeny reconstructed using 135 representative sequences and 176 conserved sites.



Suppl. Figure 3.

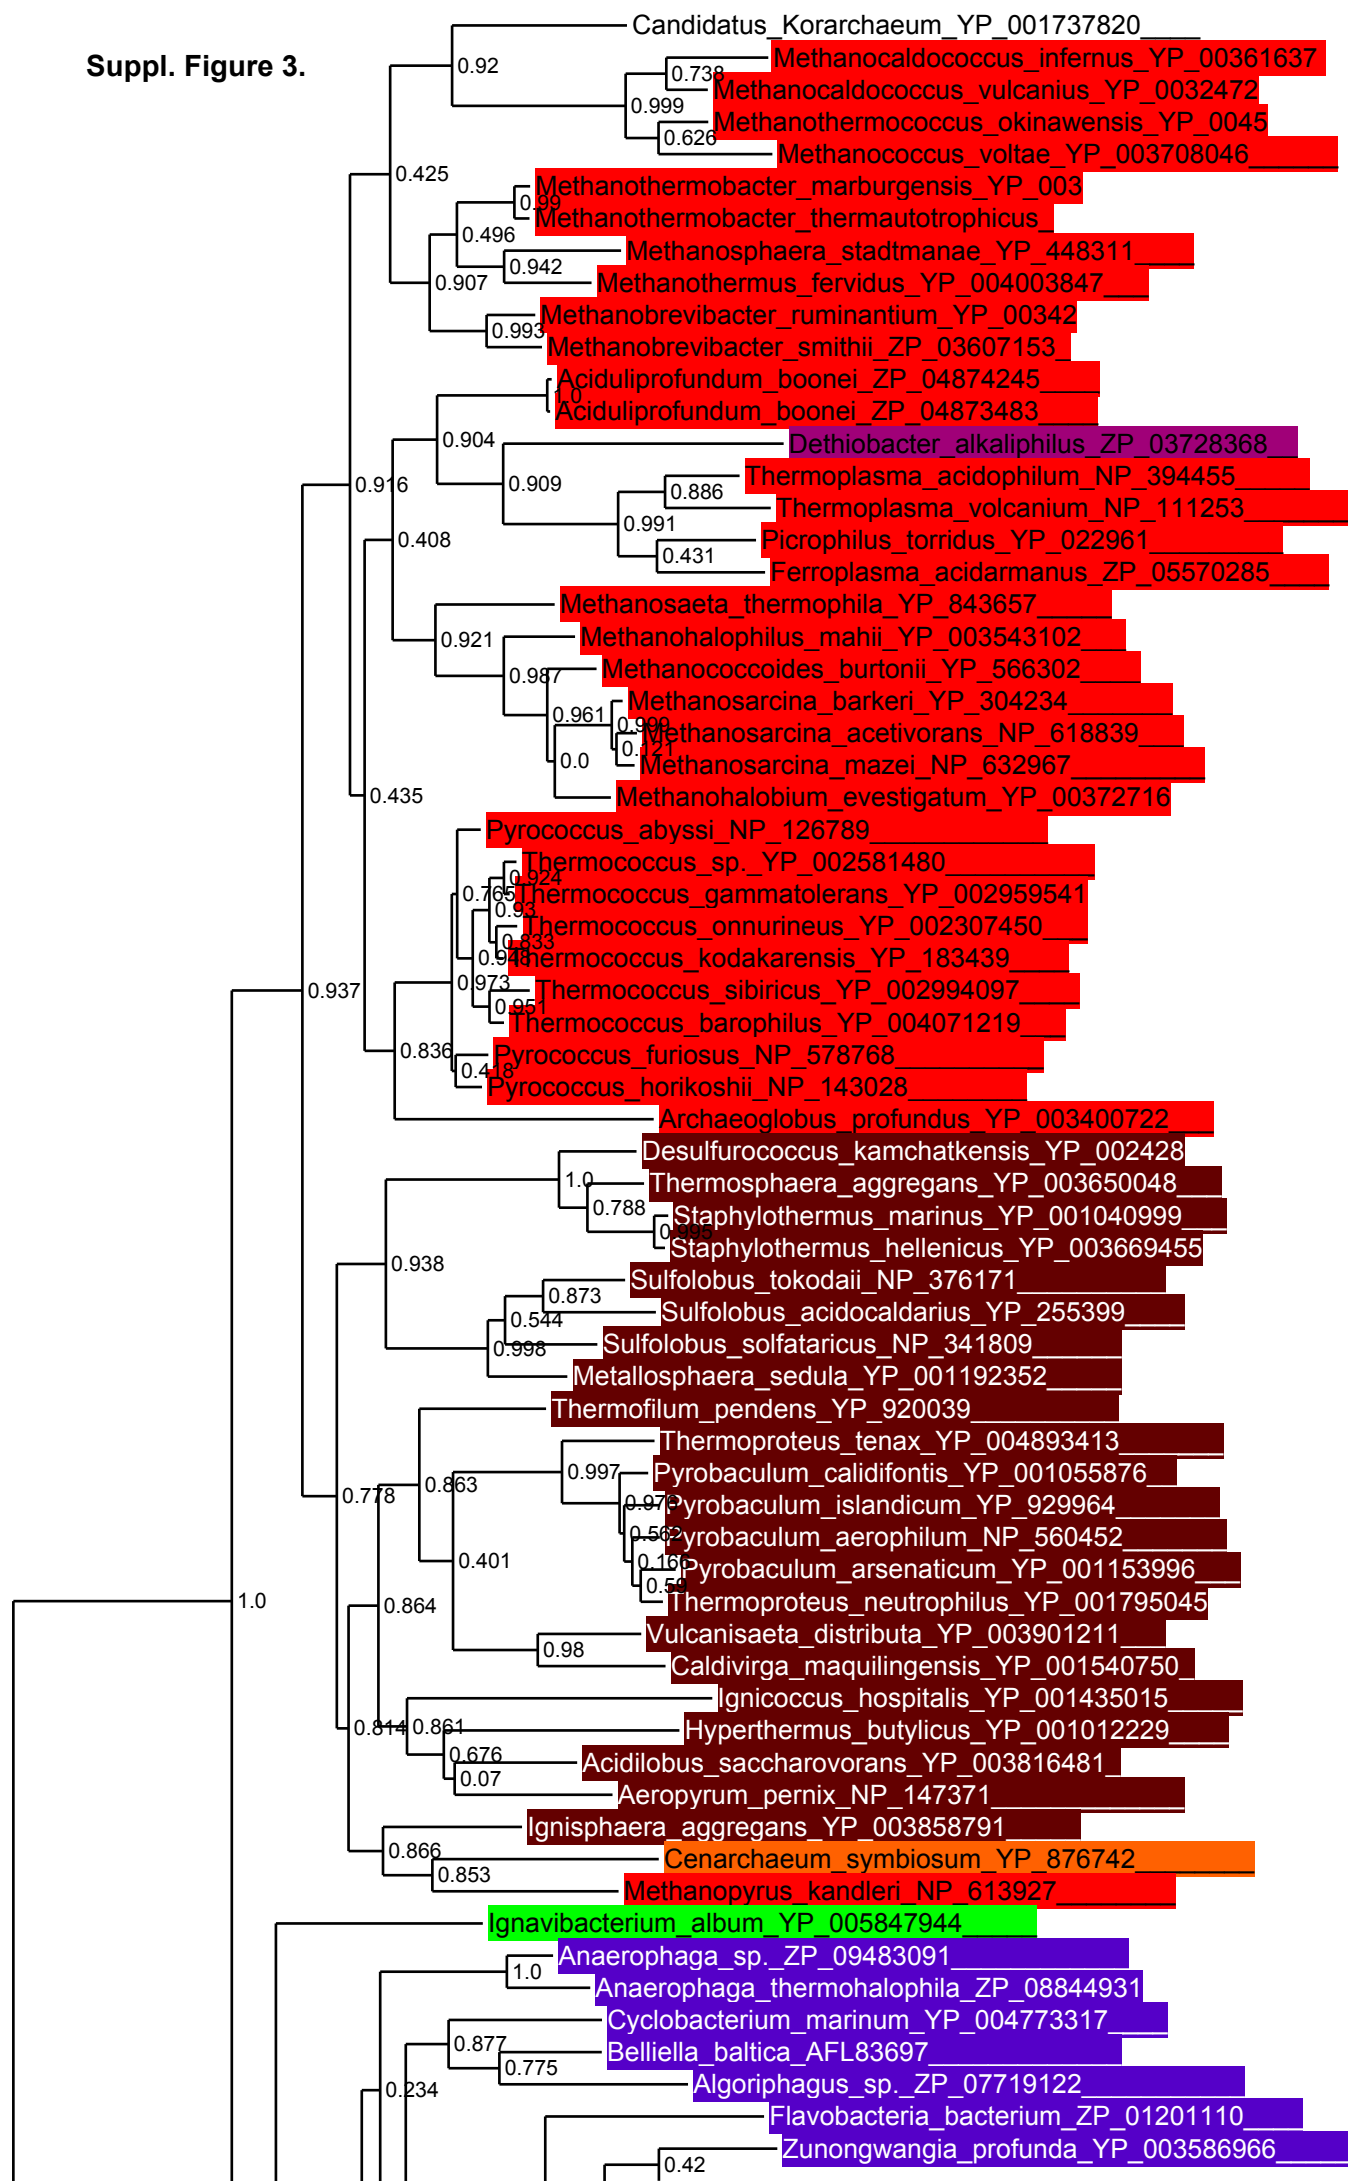

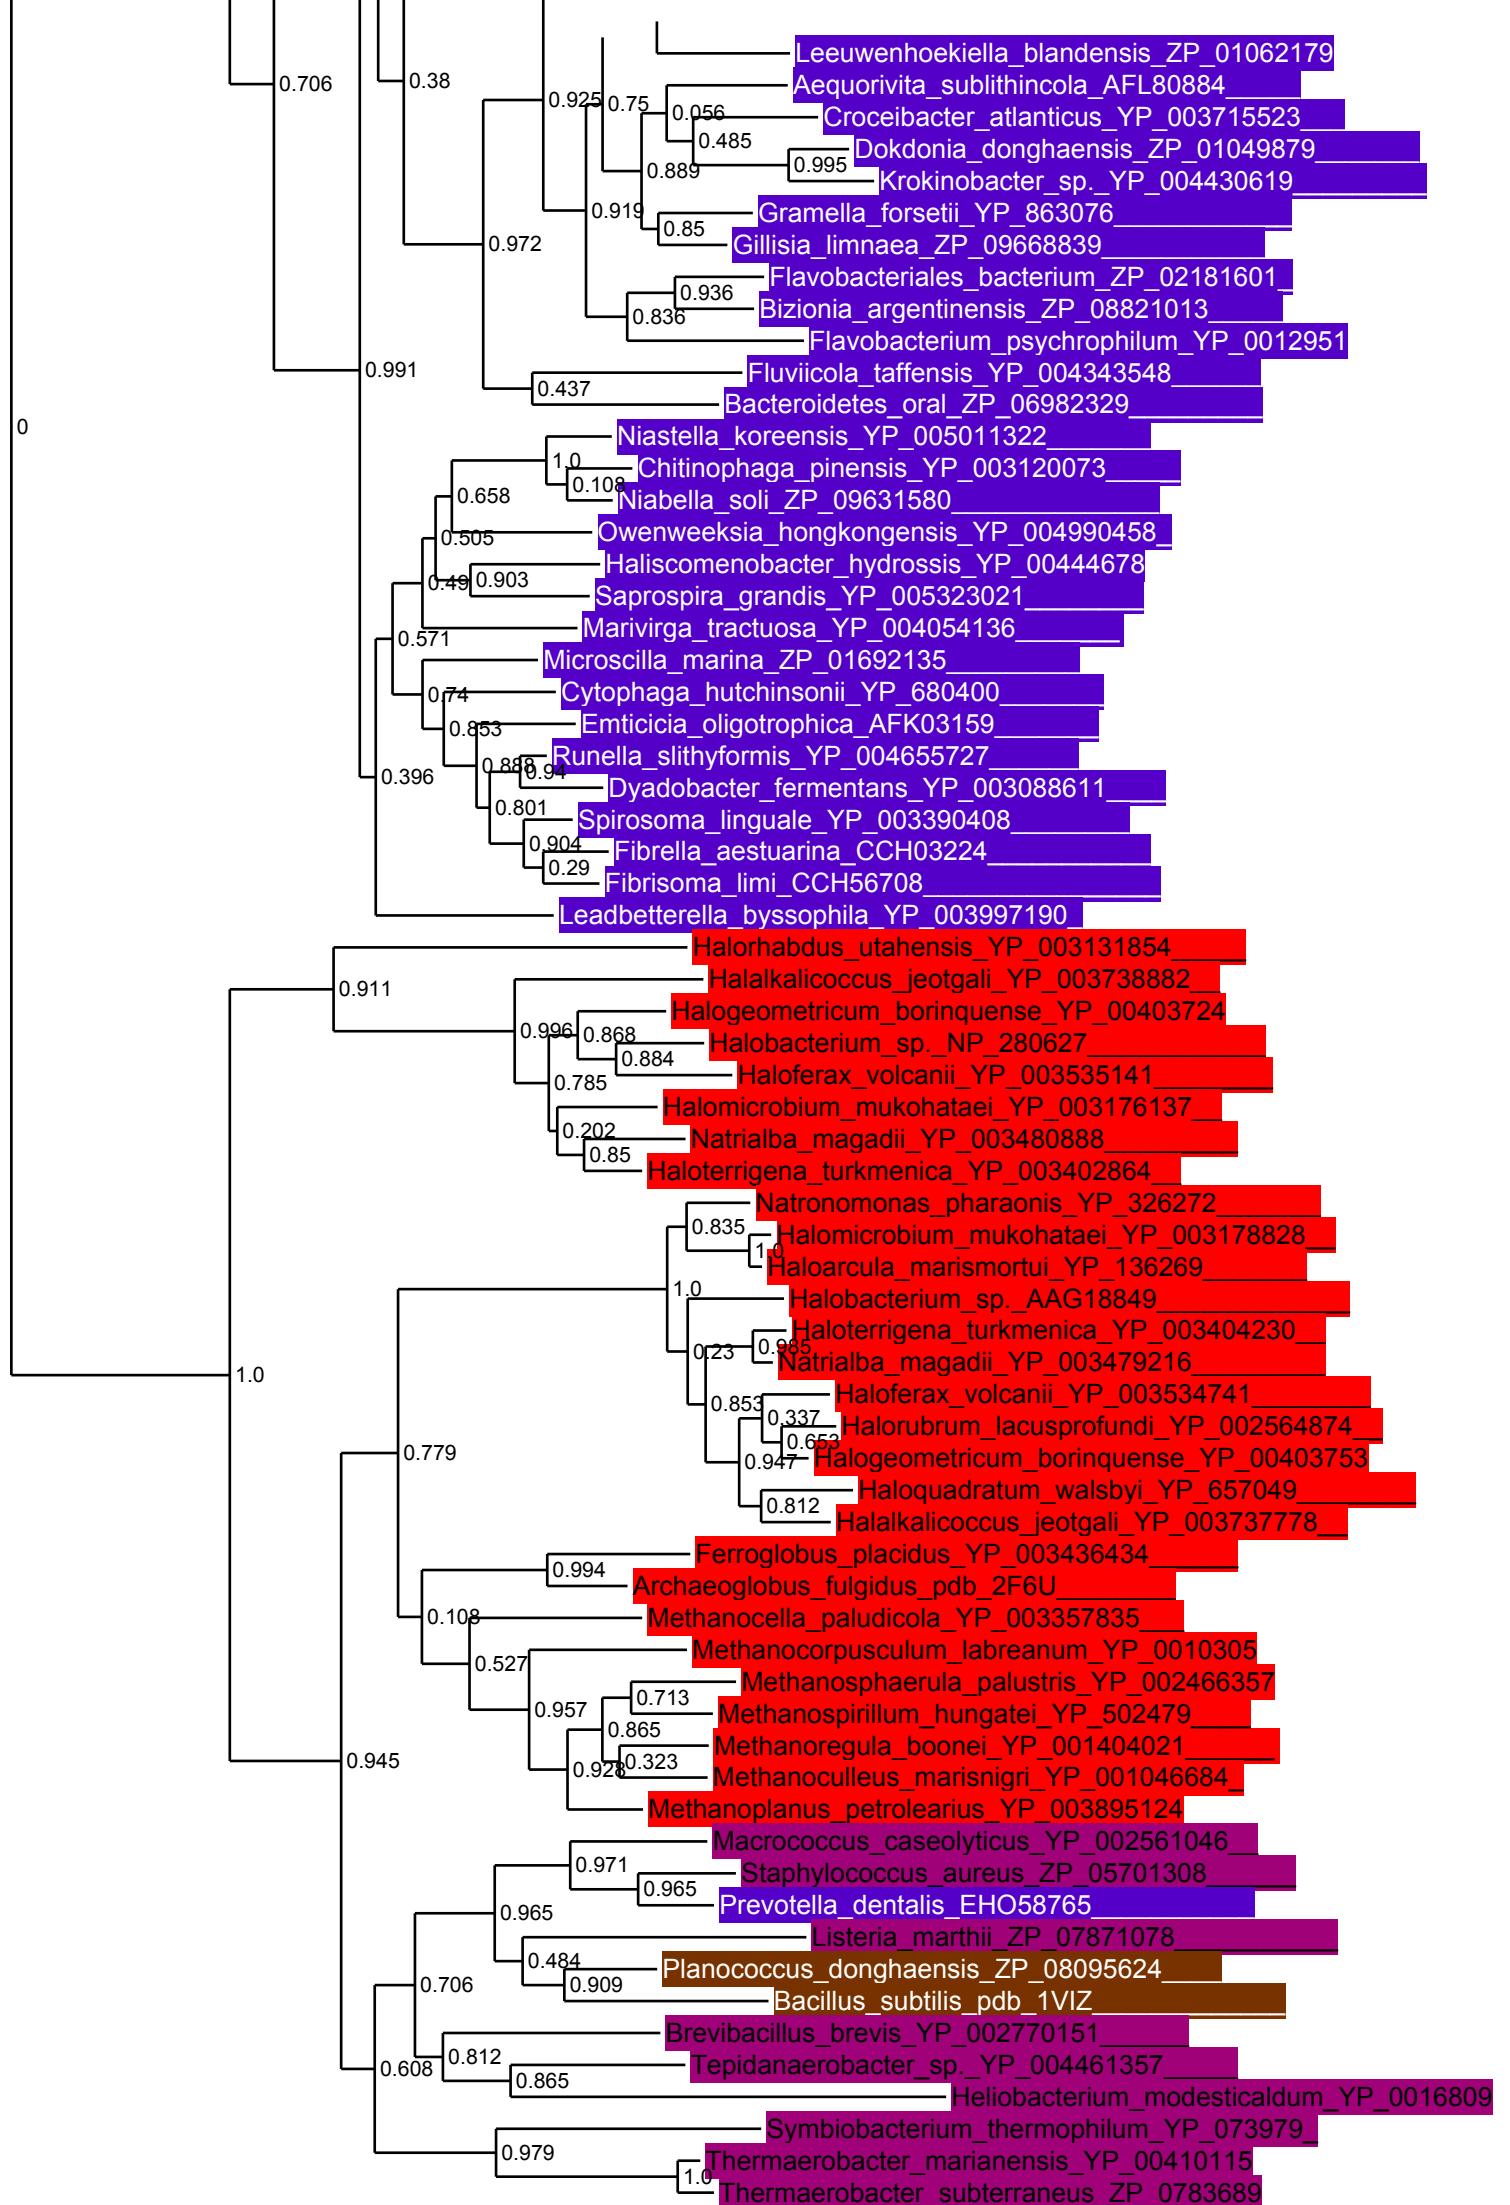

SUPPLEMENTARY FIGURE 4: DGGGPS phylogeny reconstructed using 278 representative sequences and 114 conserved sites.

Suppl. Figure 4.

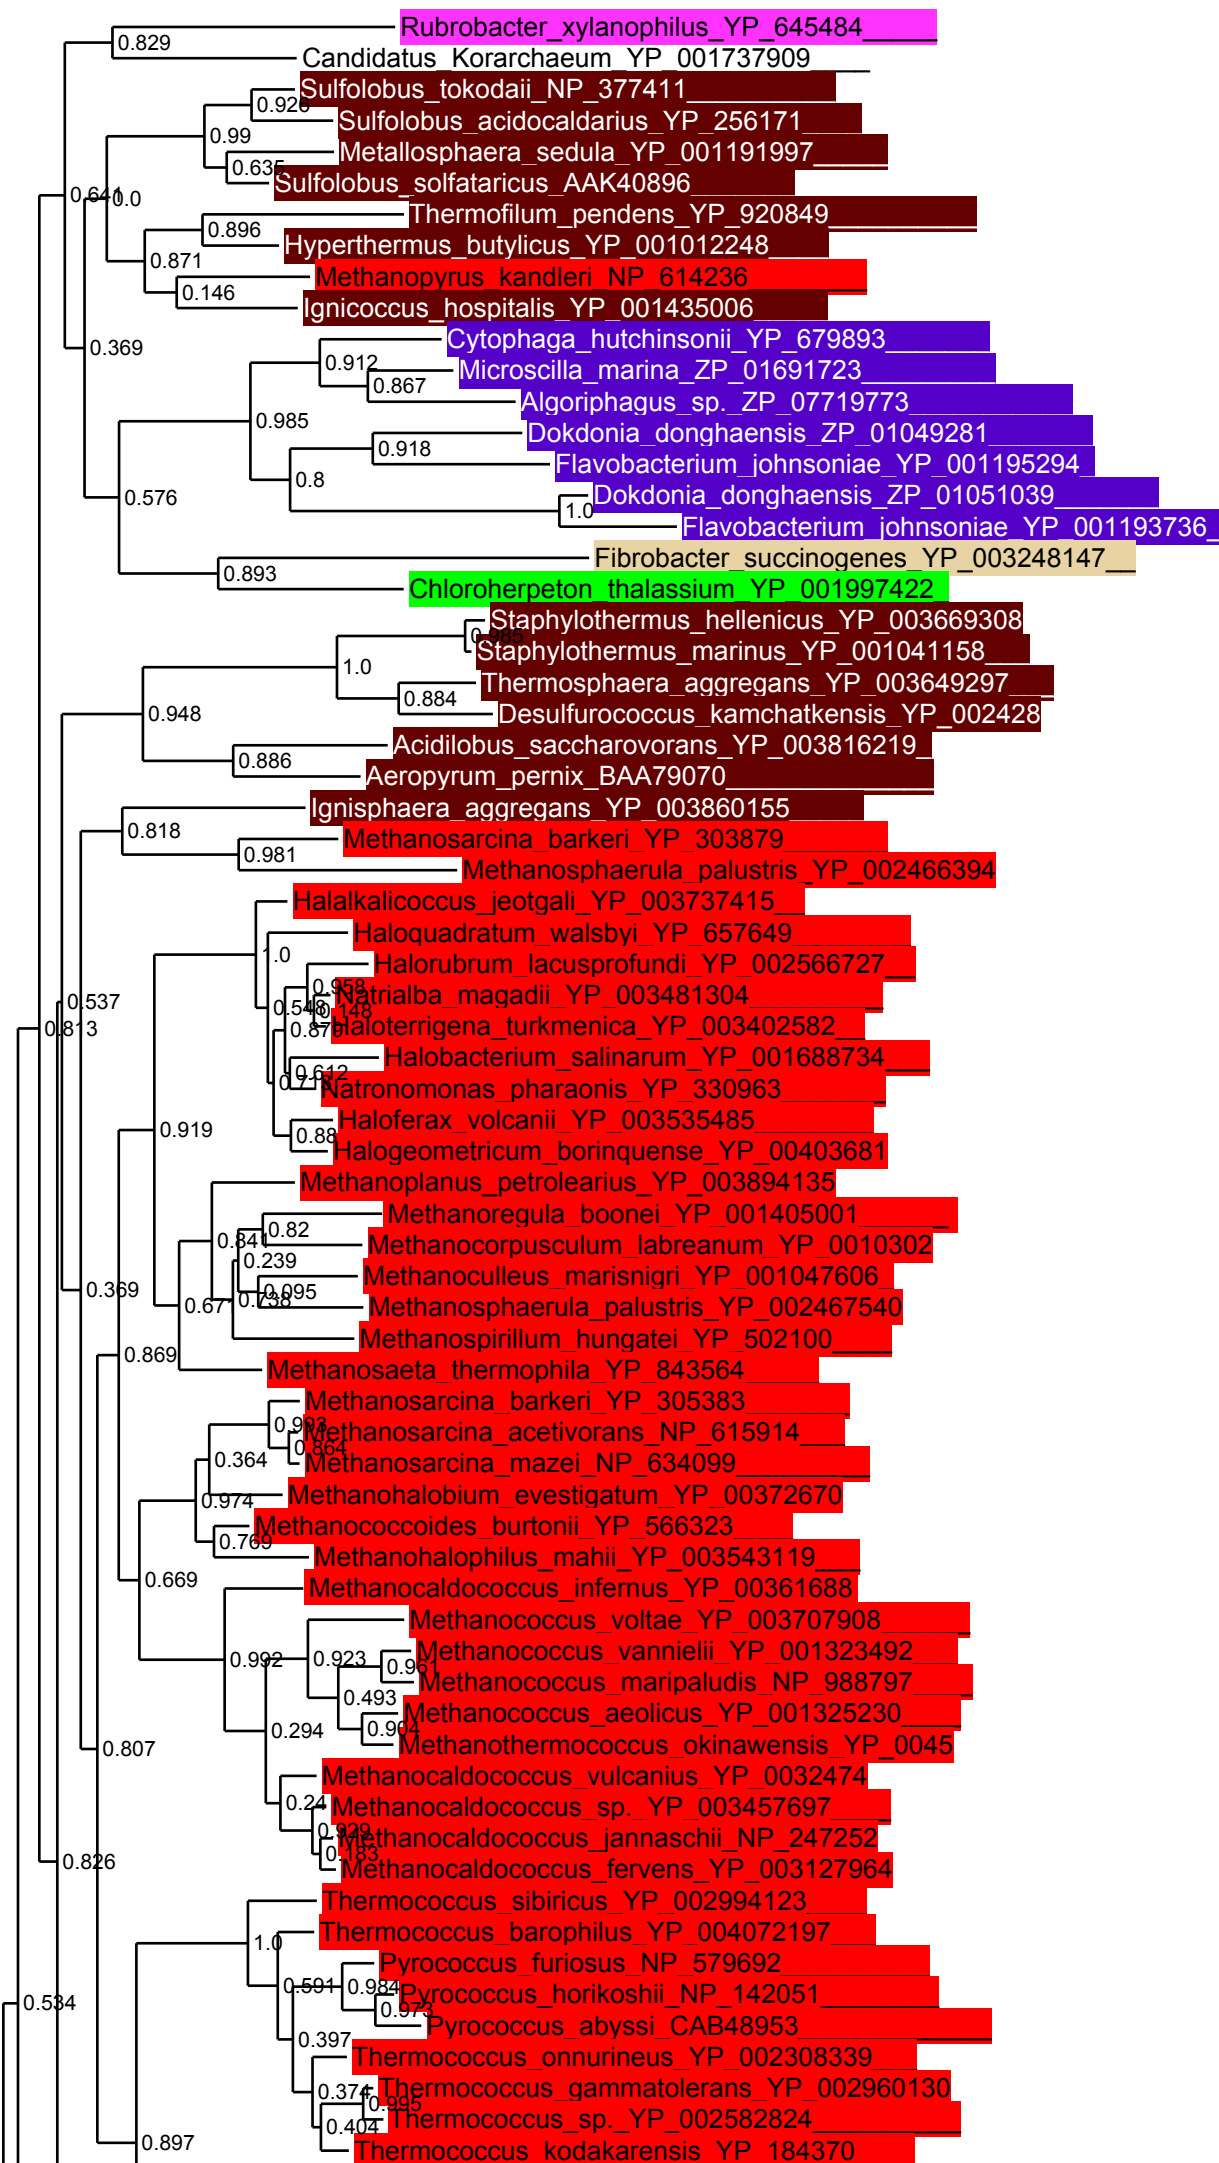

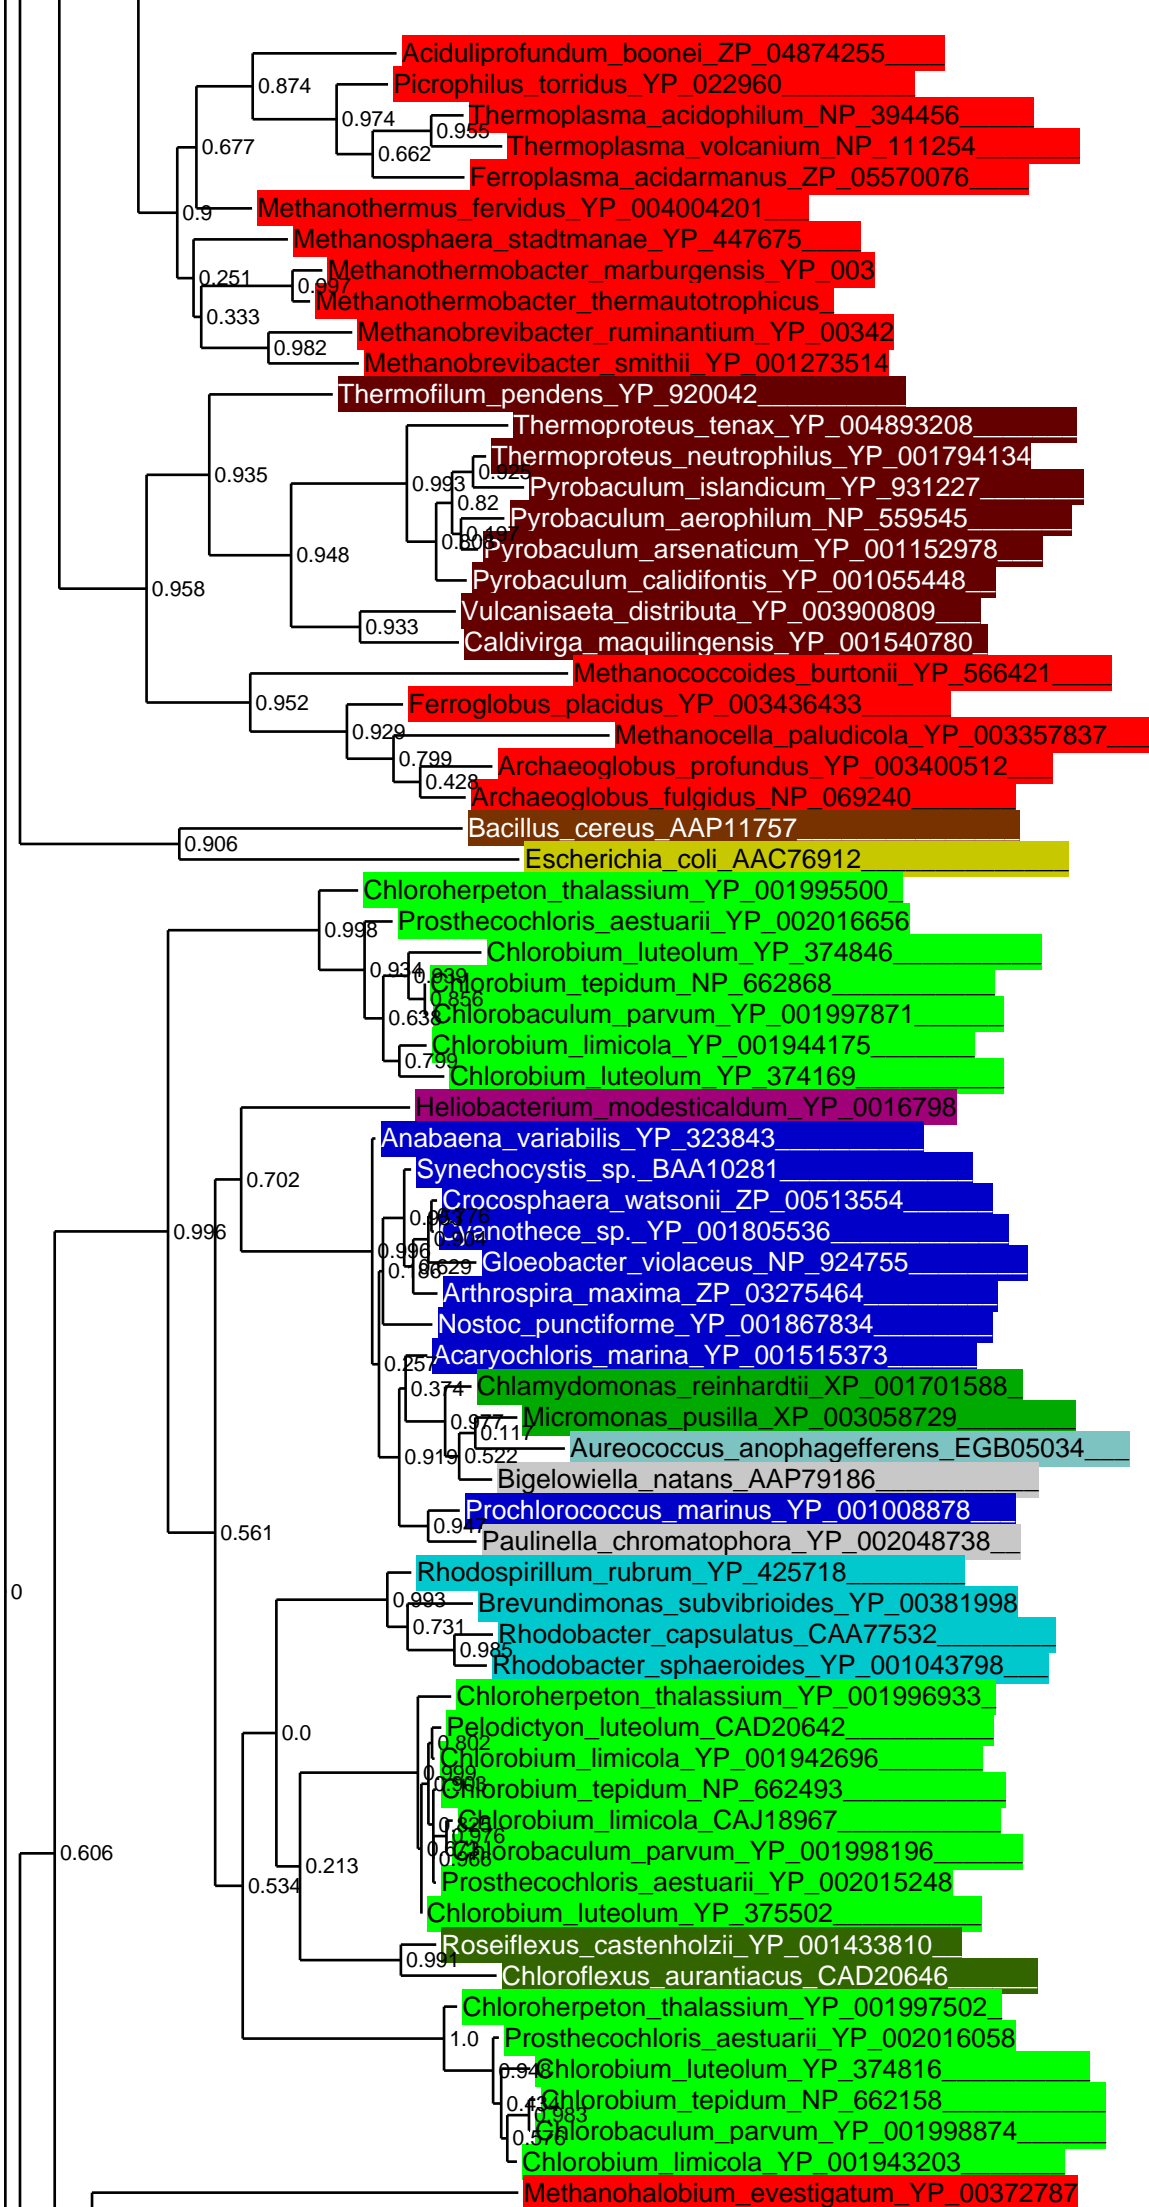

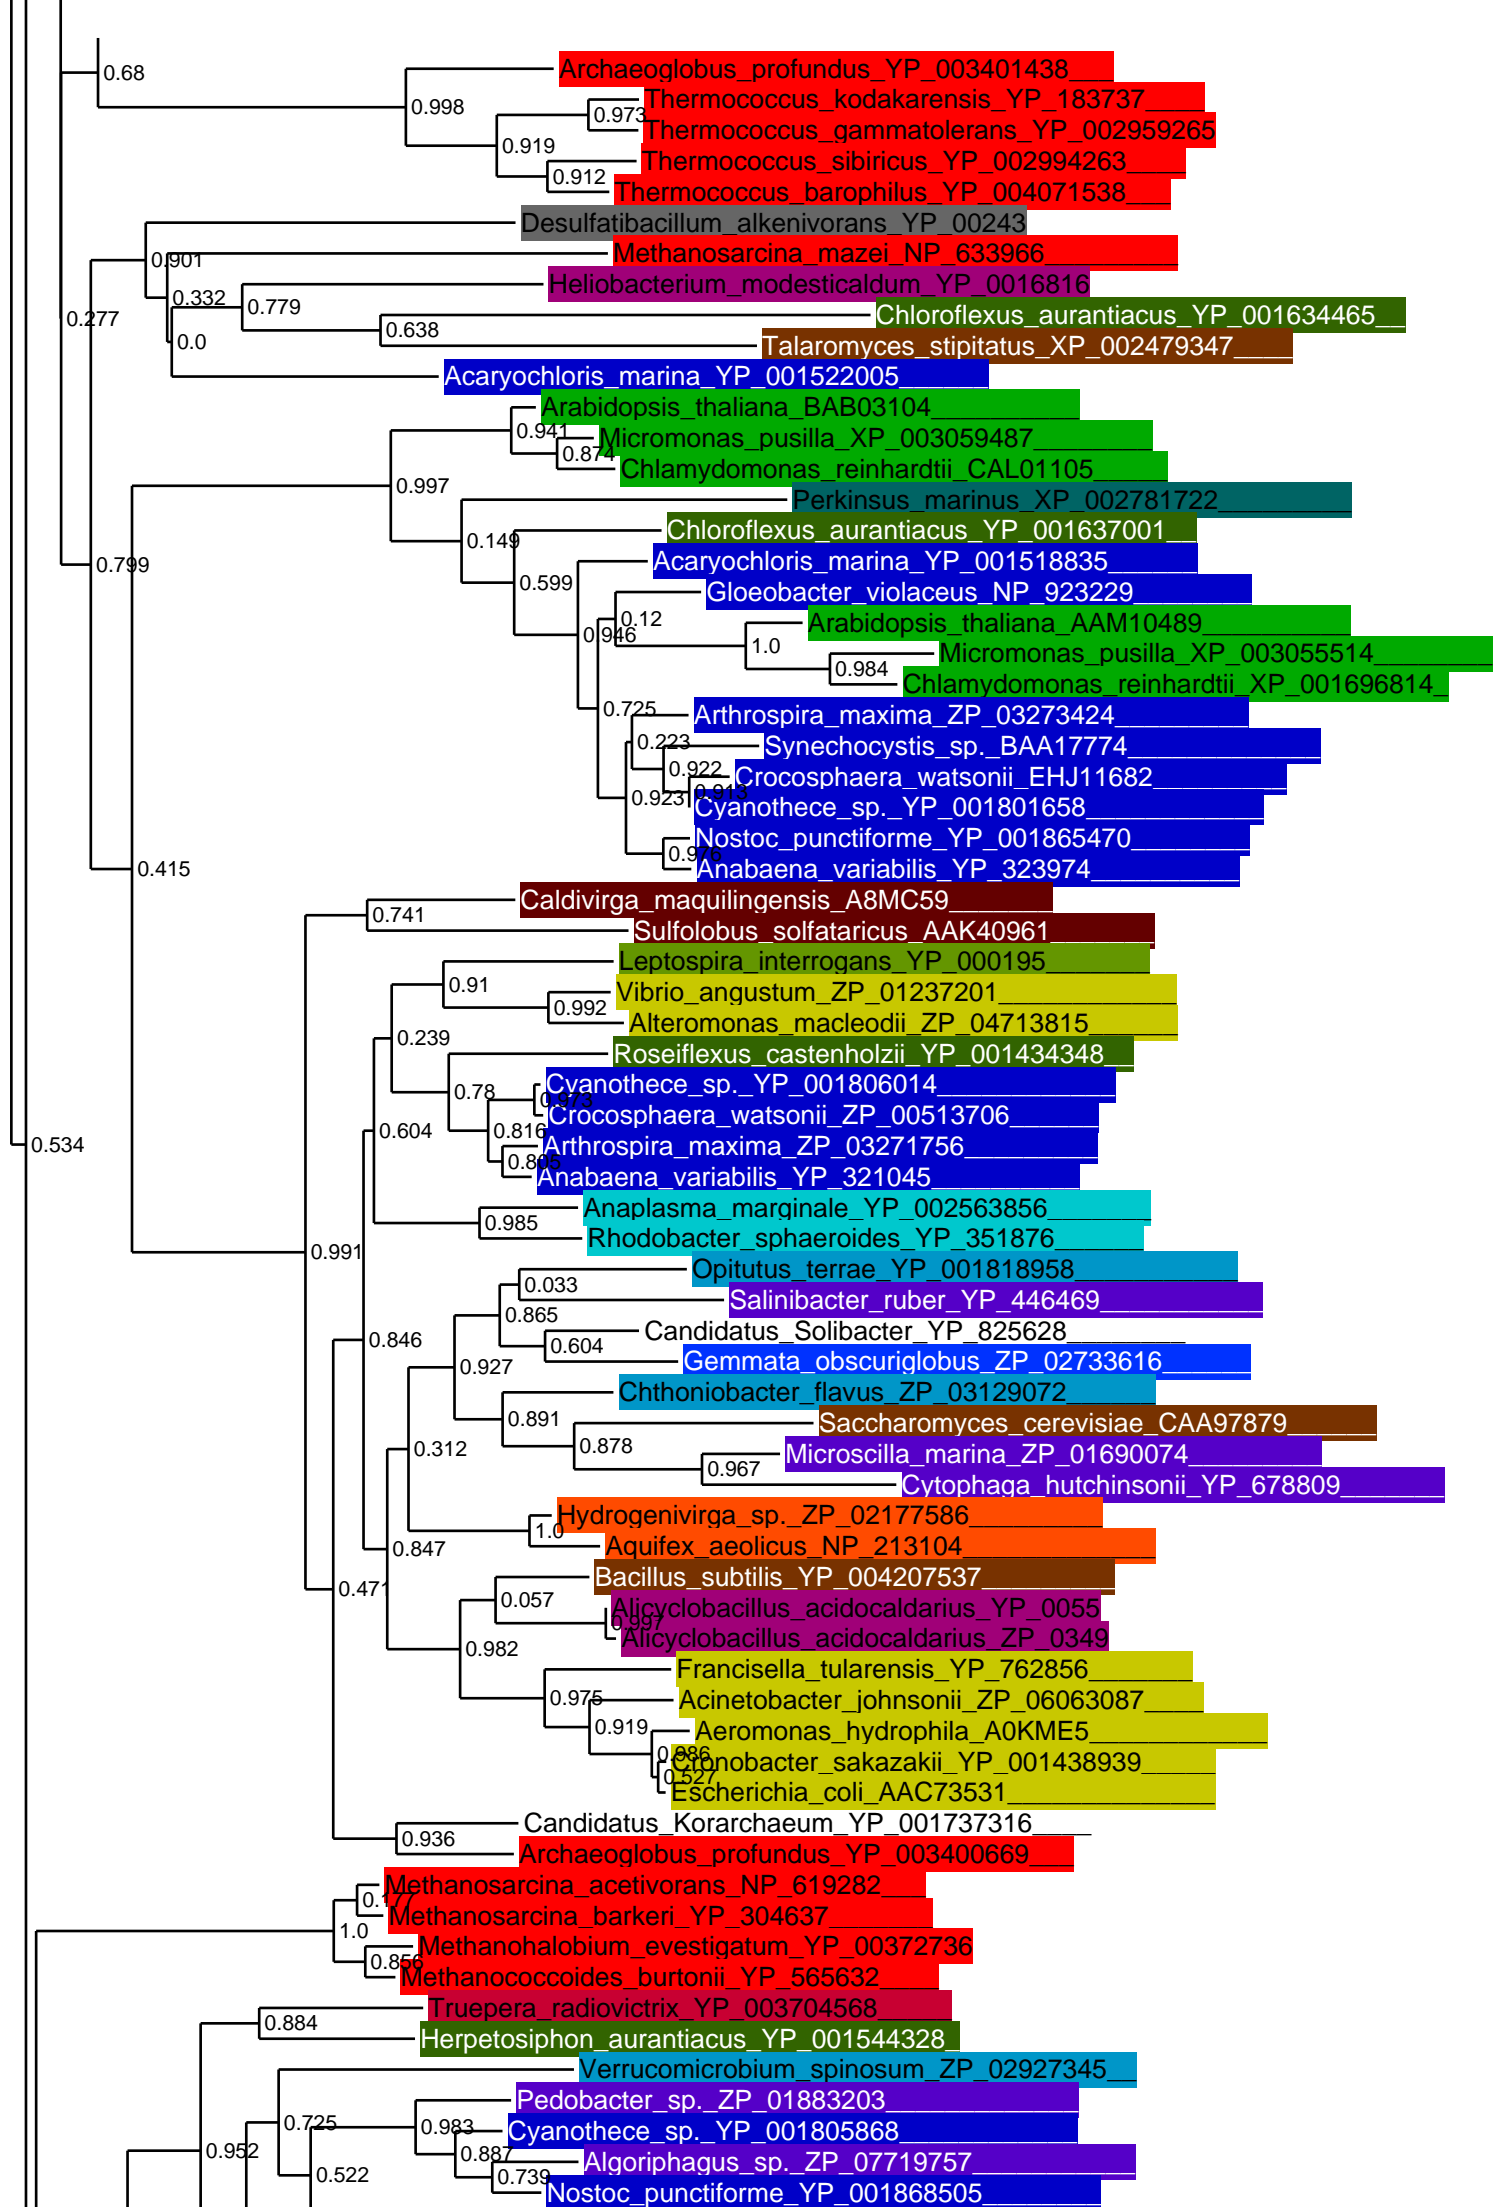



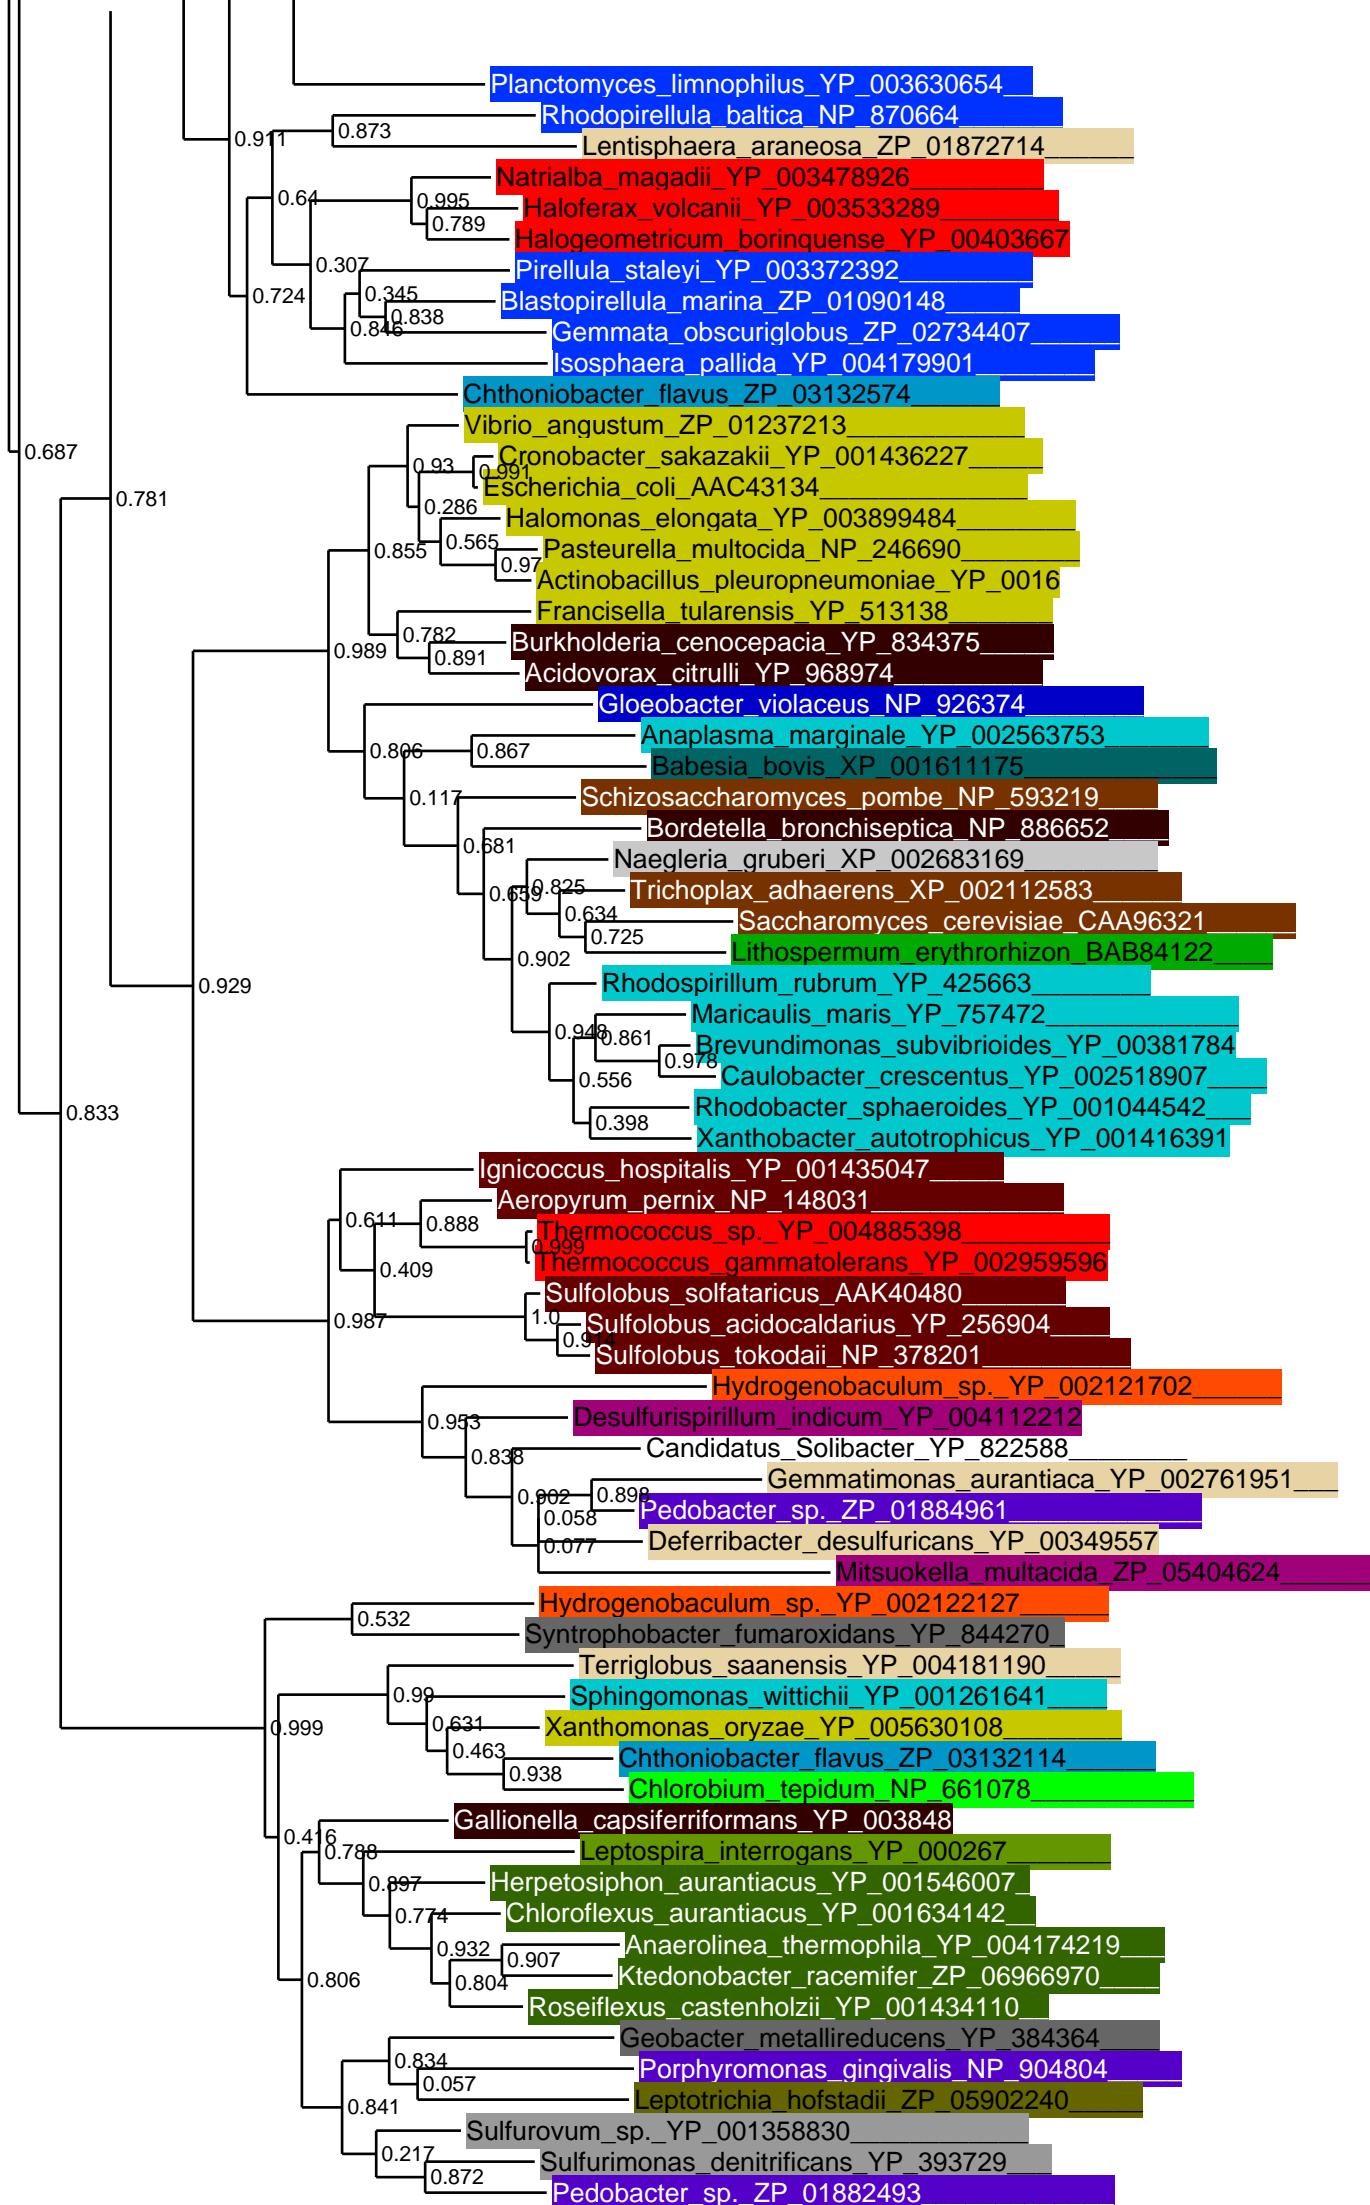

SUPPLEMENTARY FIGURE 5: Phylogenetic tree of CDP alcohol phosphatidyltransferases probably related to serine transfer. This tree was reconstructed using 173 representative sequences and 132 conserved sites.



Suppl. Figure 5.

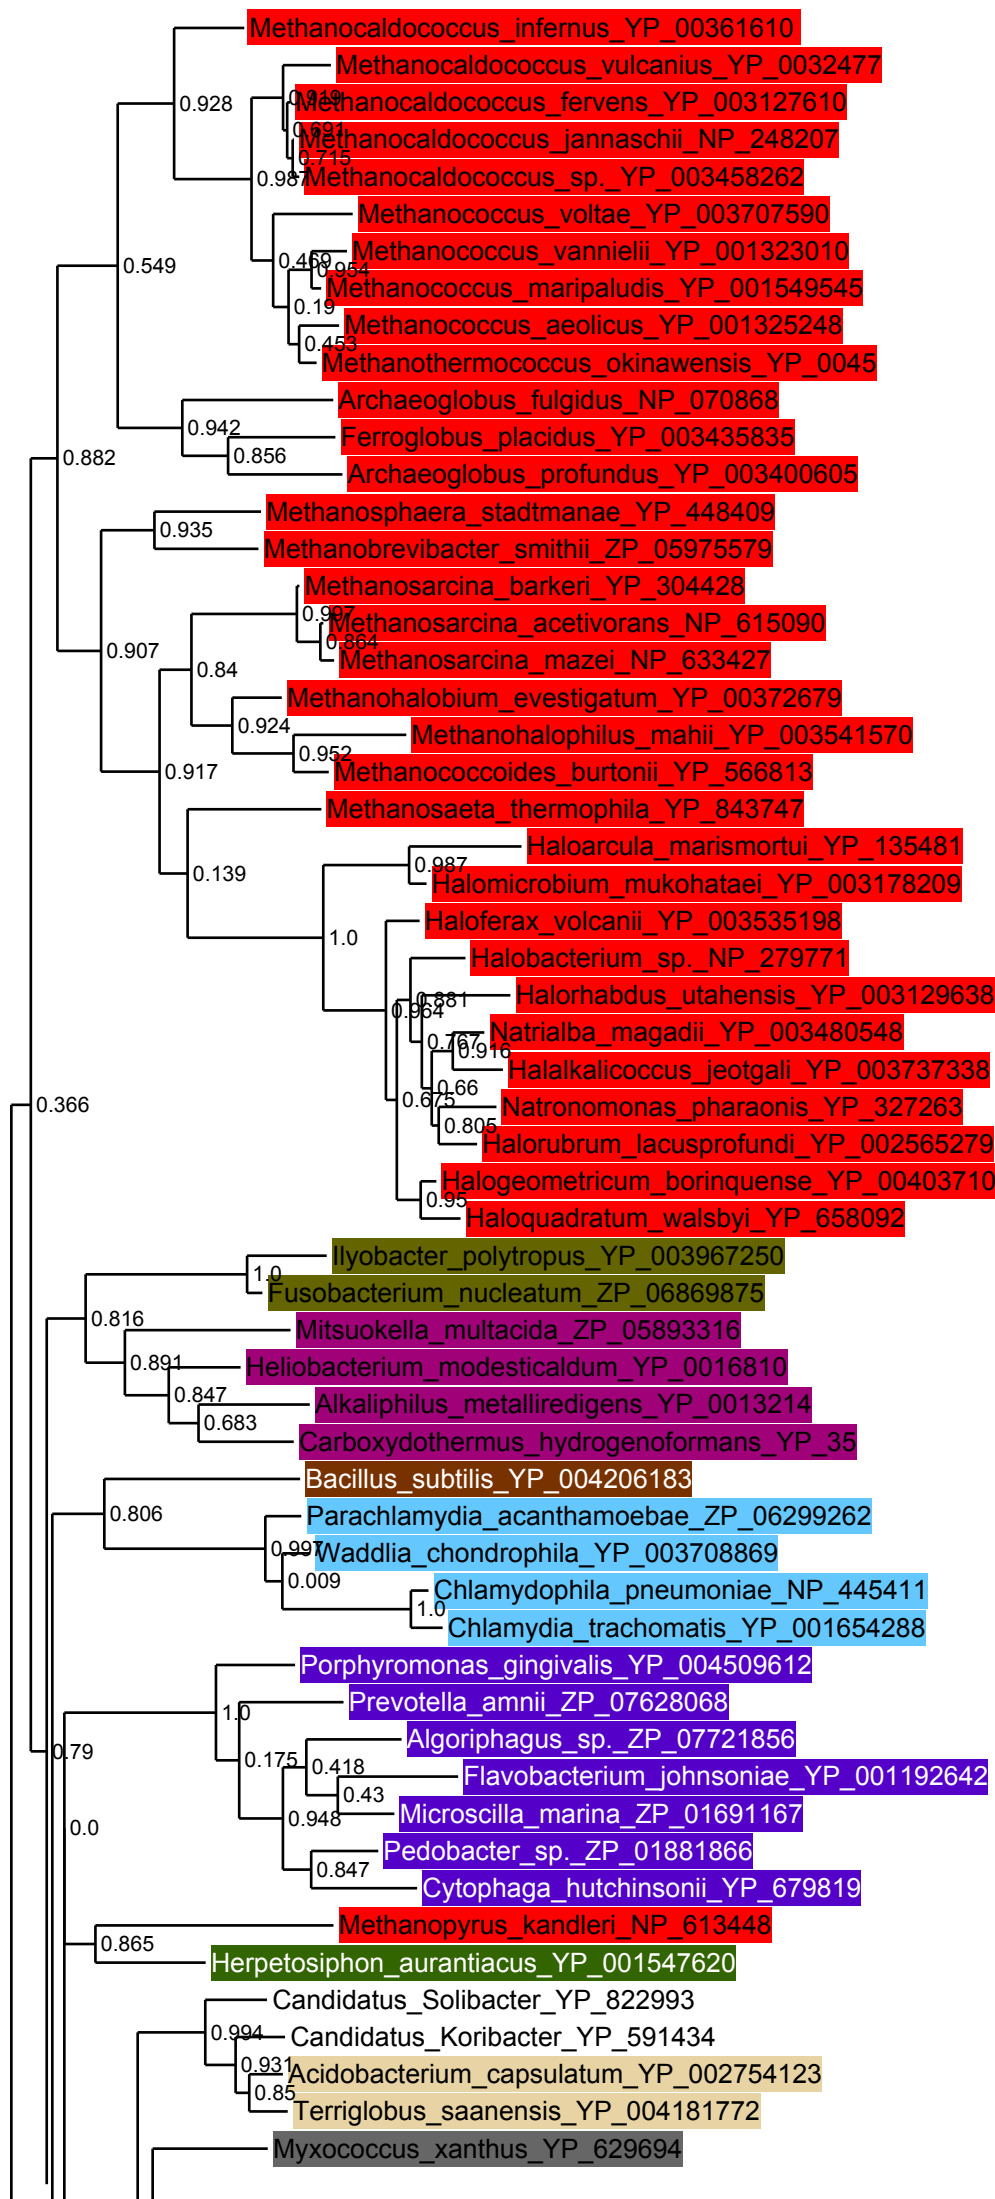

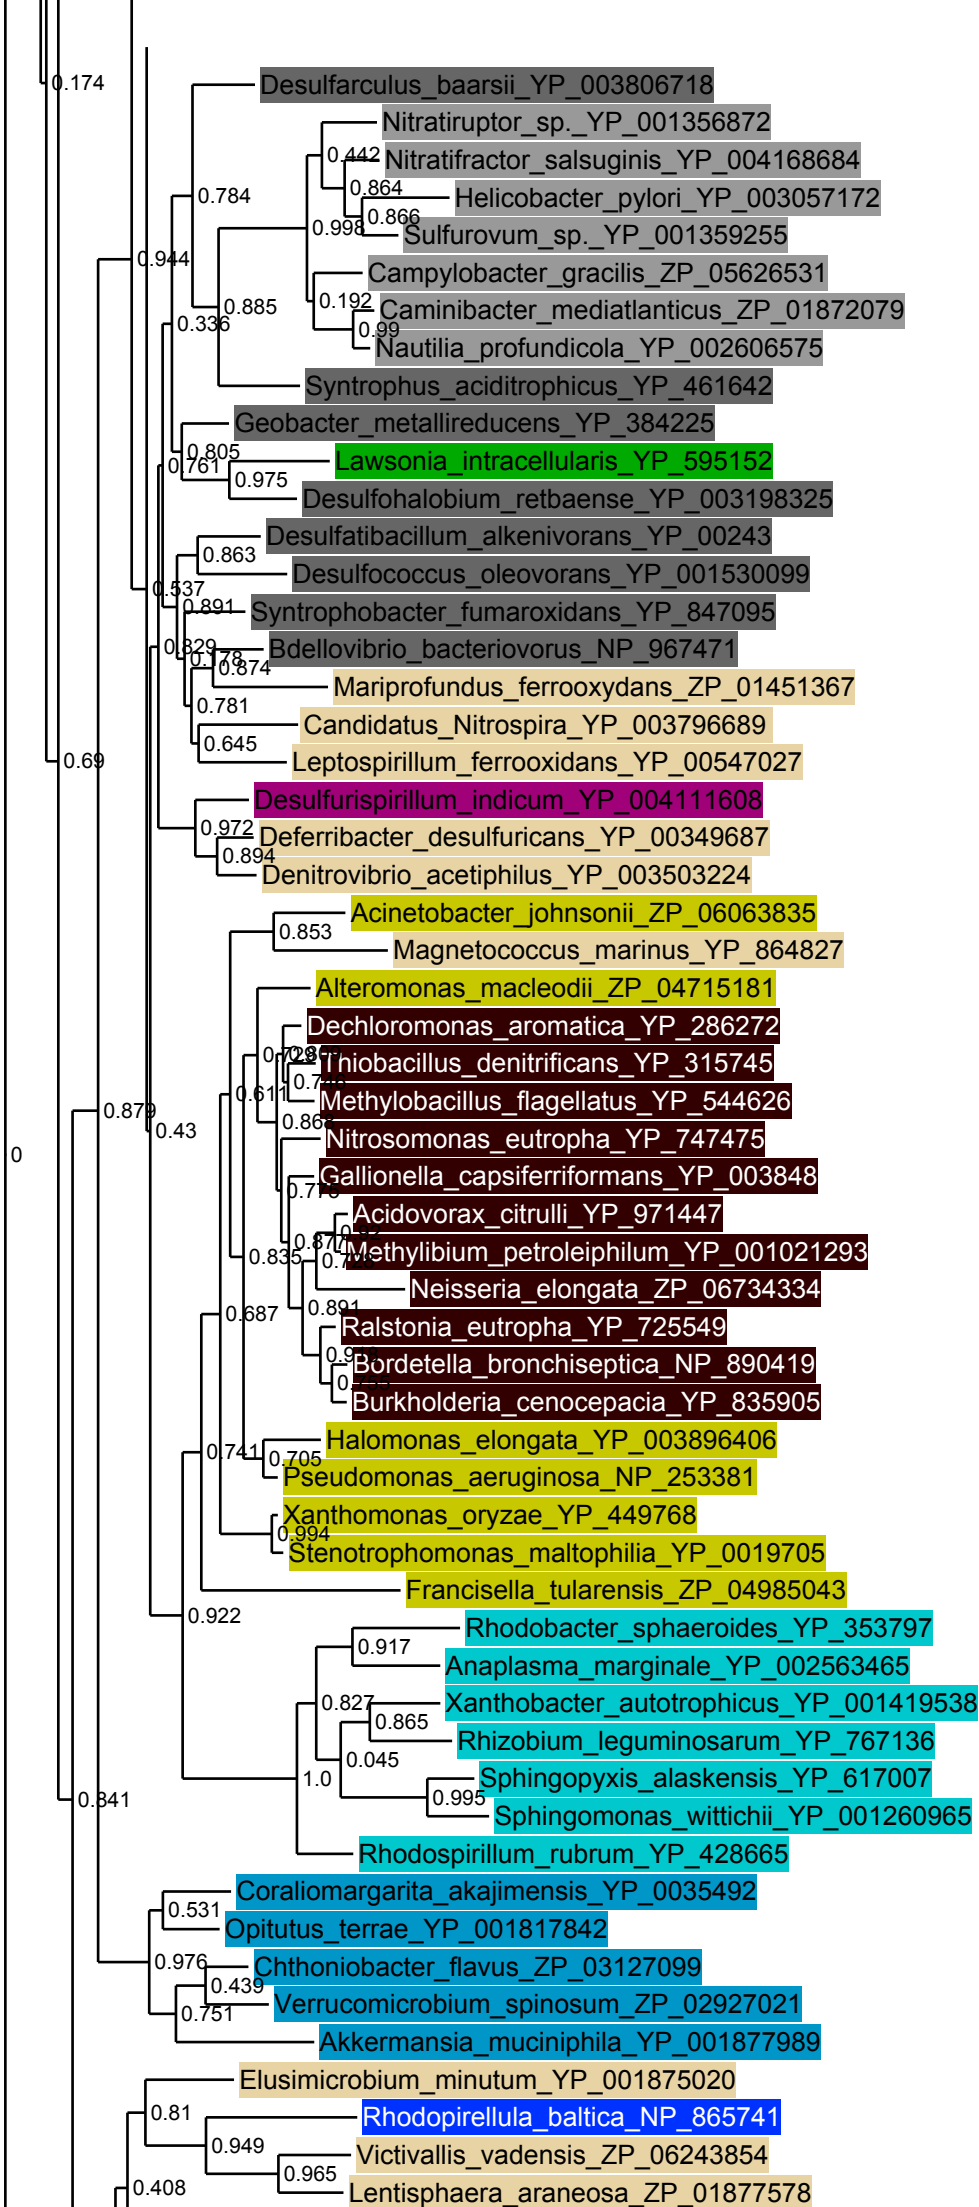

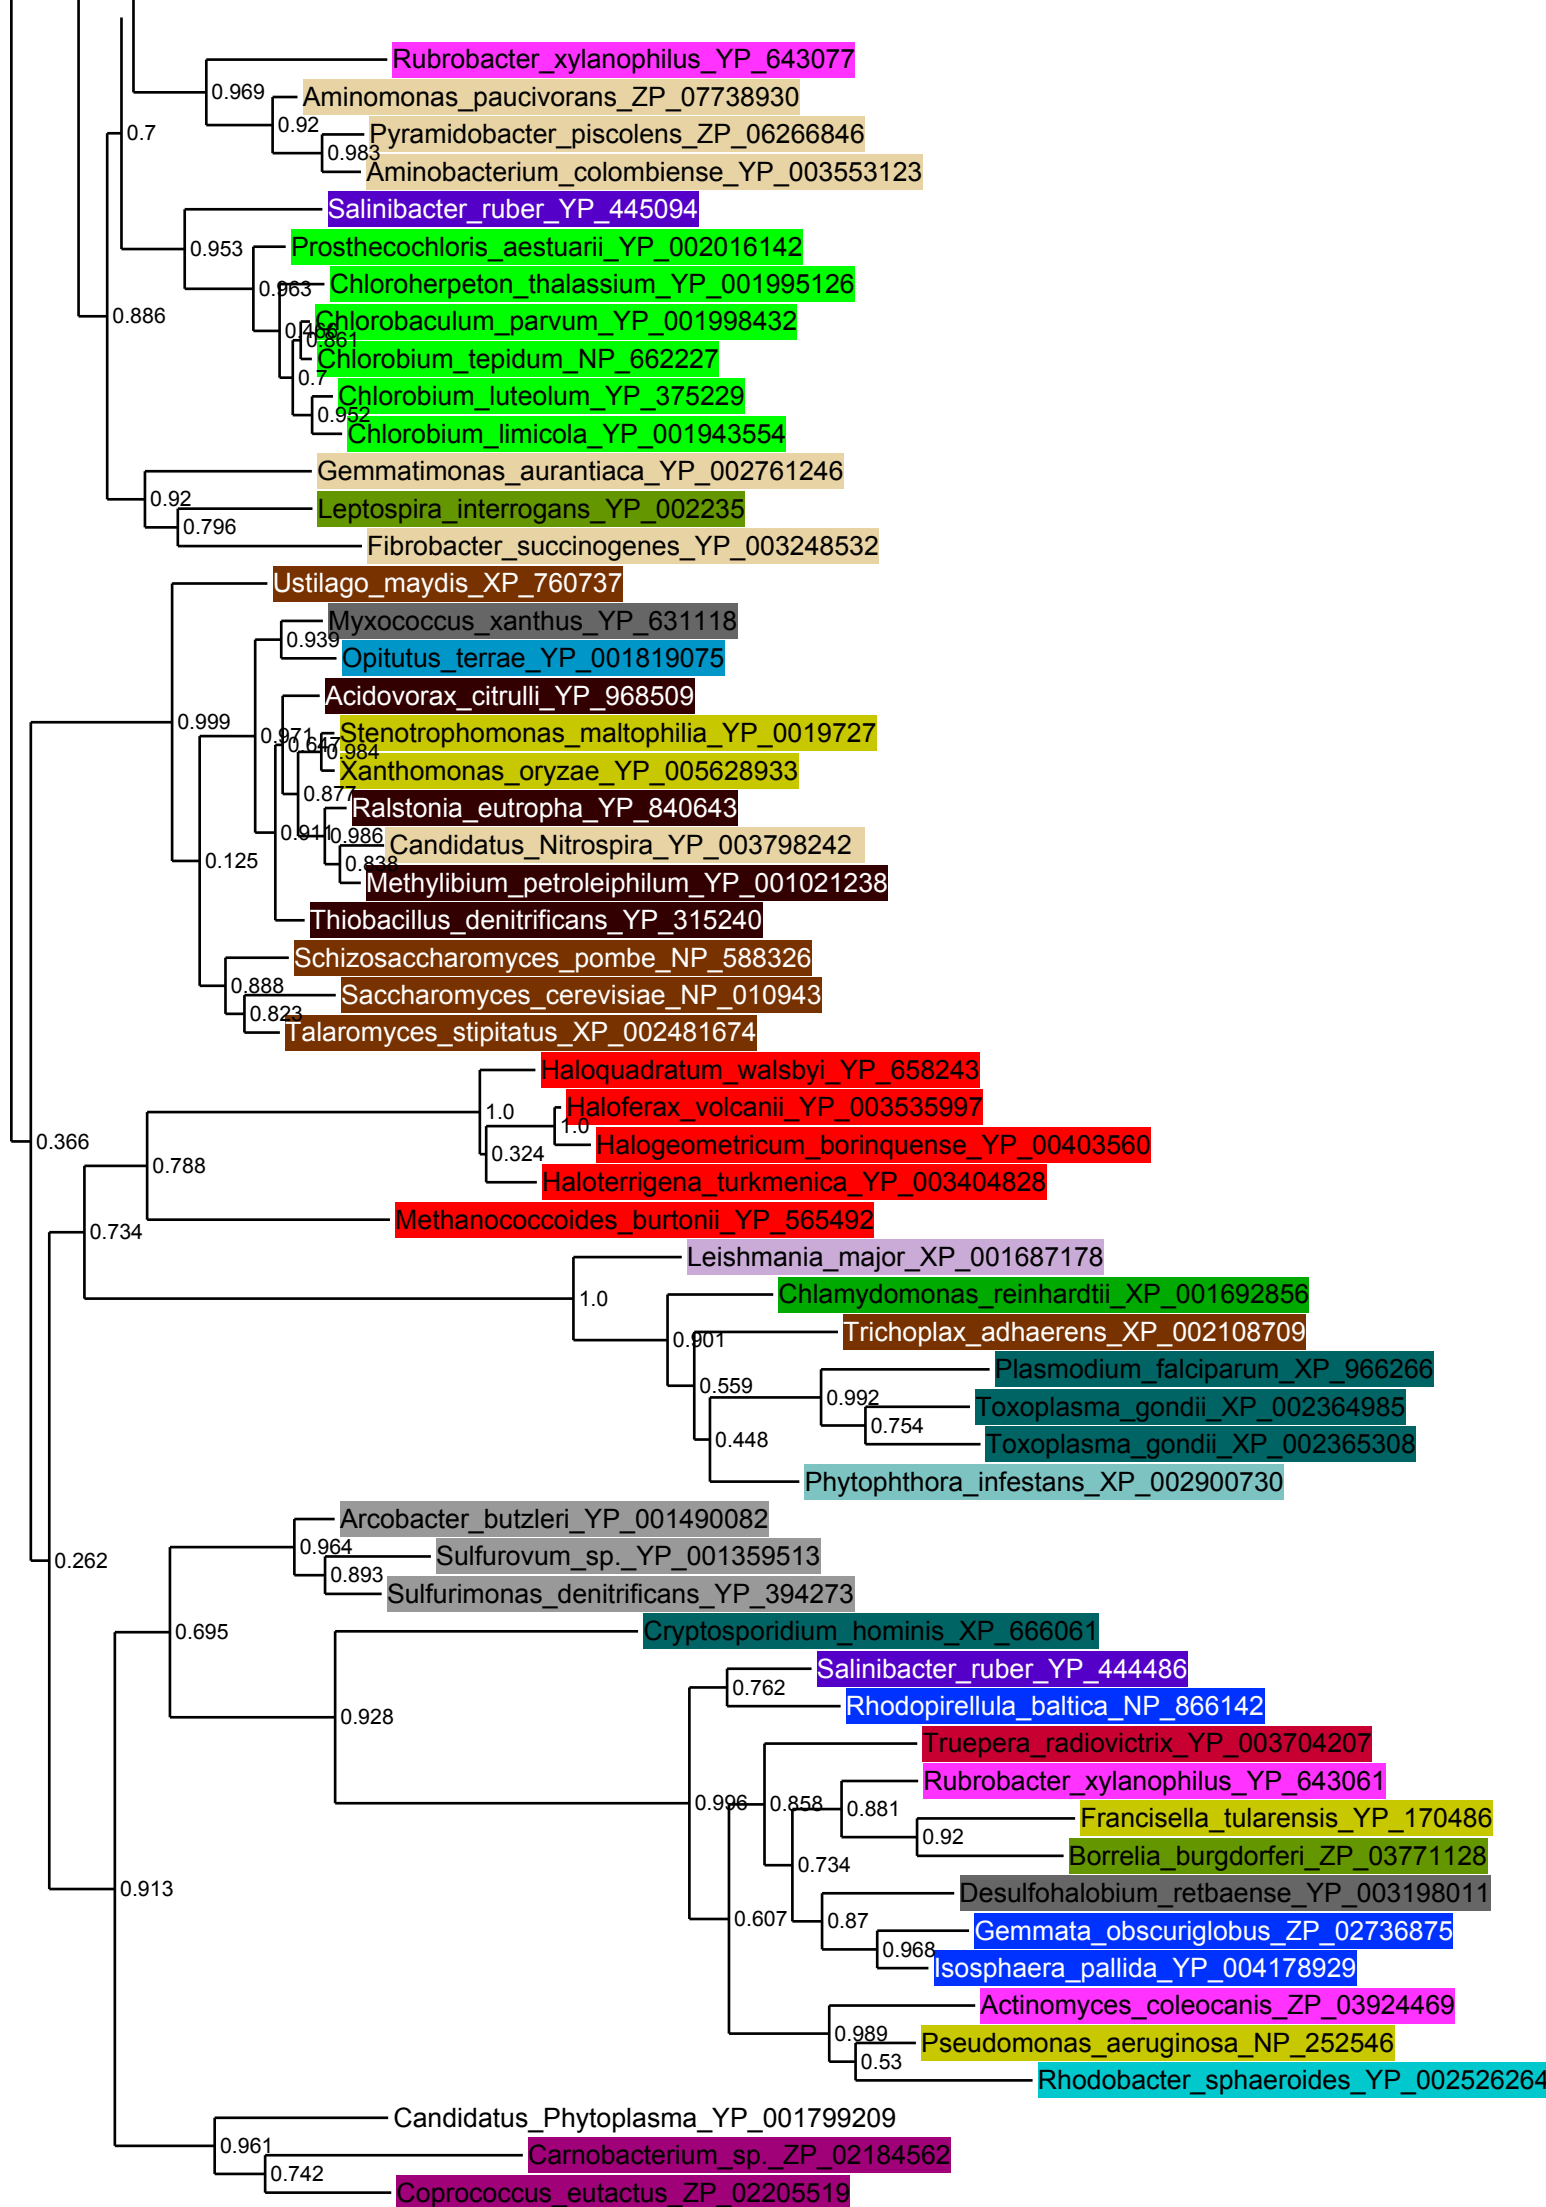

SUPPLEMENTARY FIGURE 6: Phylogenetic tree of CDP alcohol phosphatidyltransferases probably related to *myo*-inositol transfer. This tree was reconstructed using 160 representative sequences and 159 conserved sites.

Suppl. Figure 6.

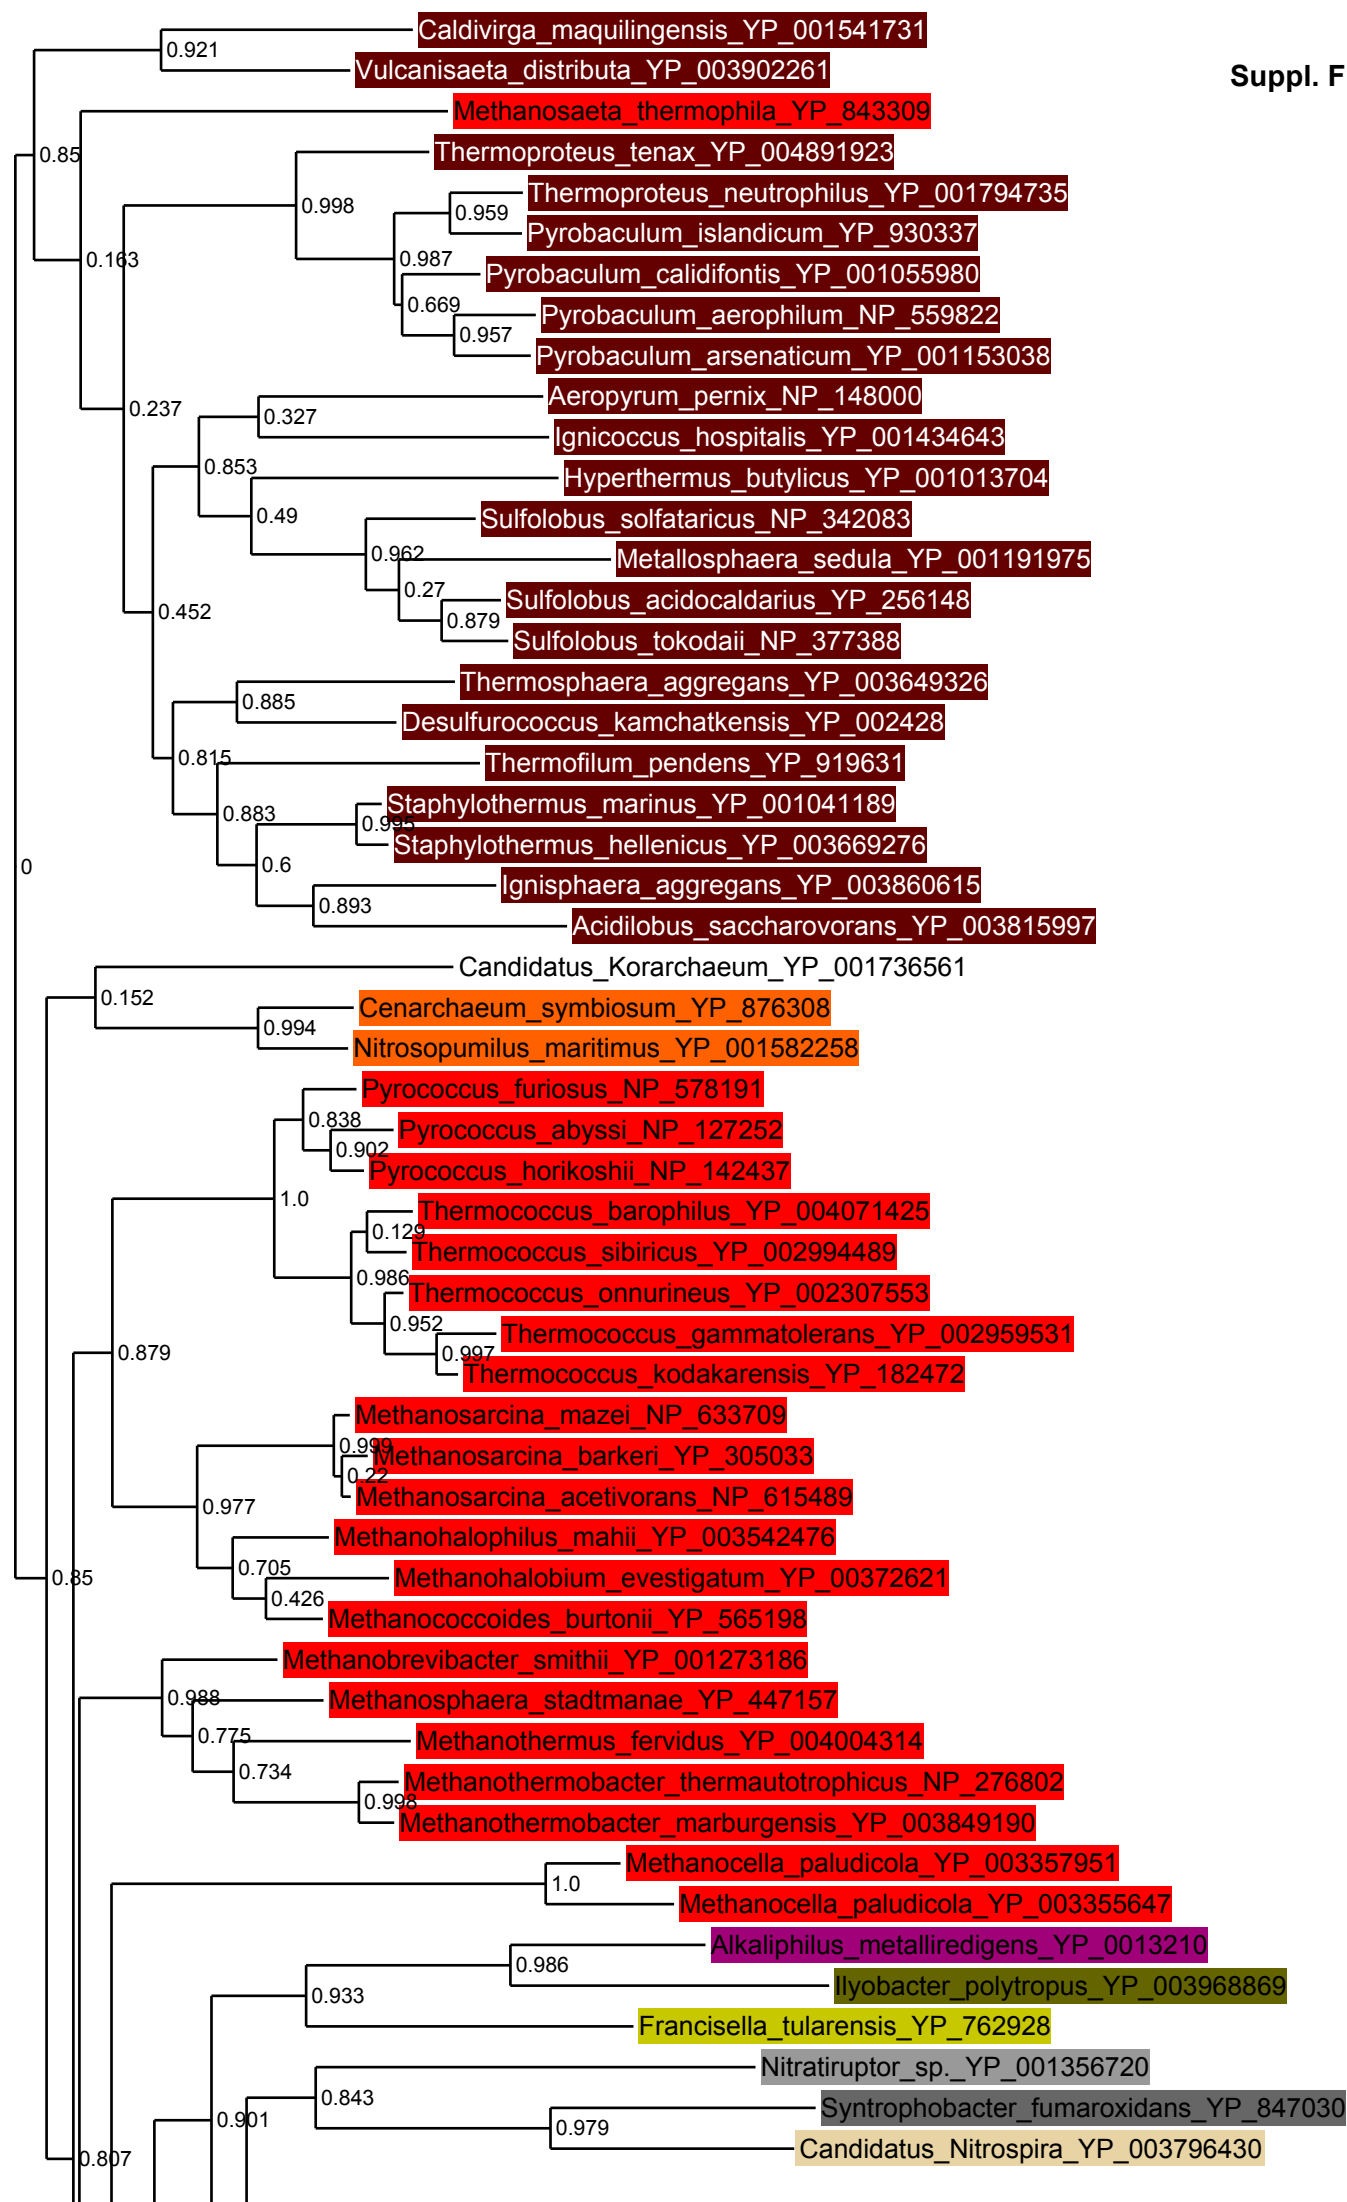

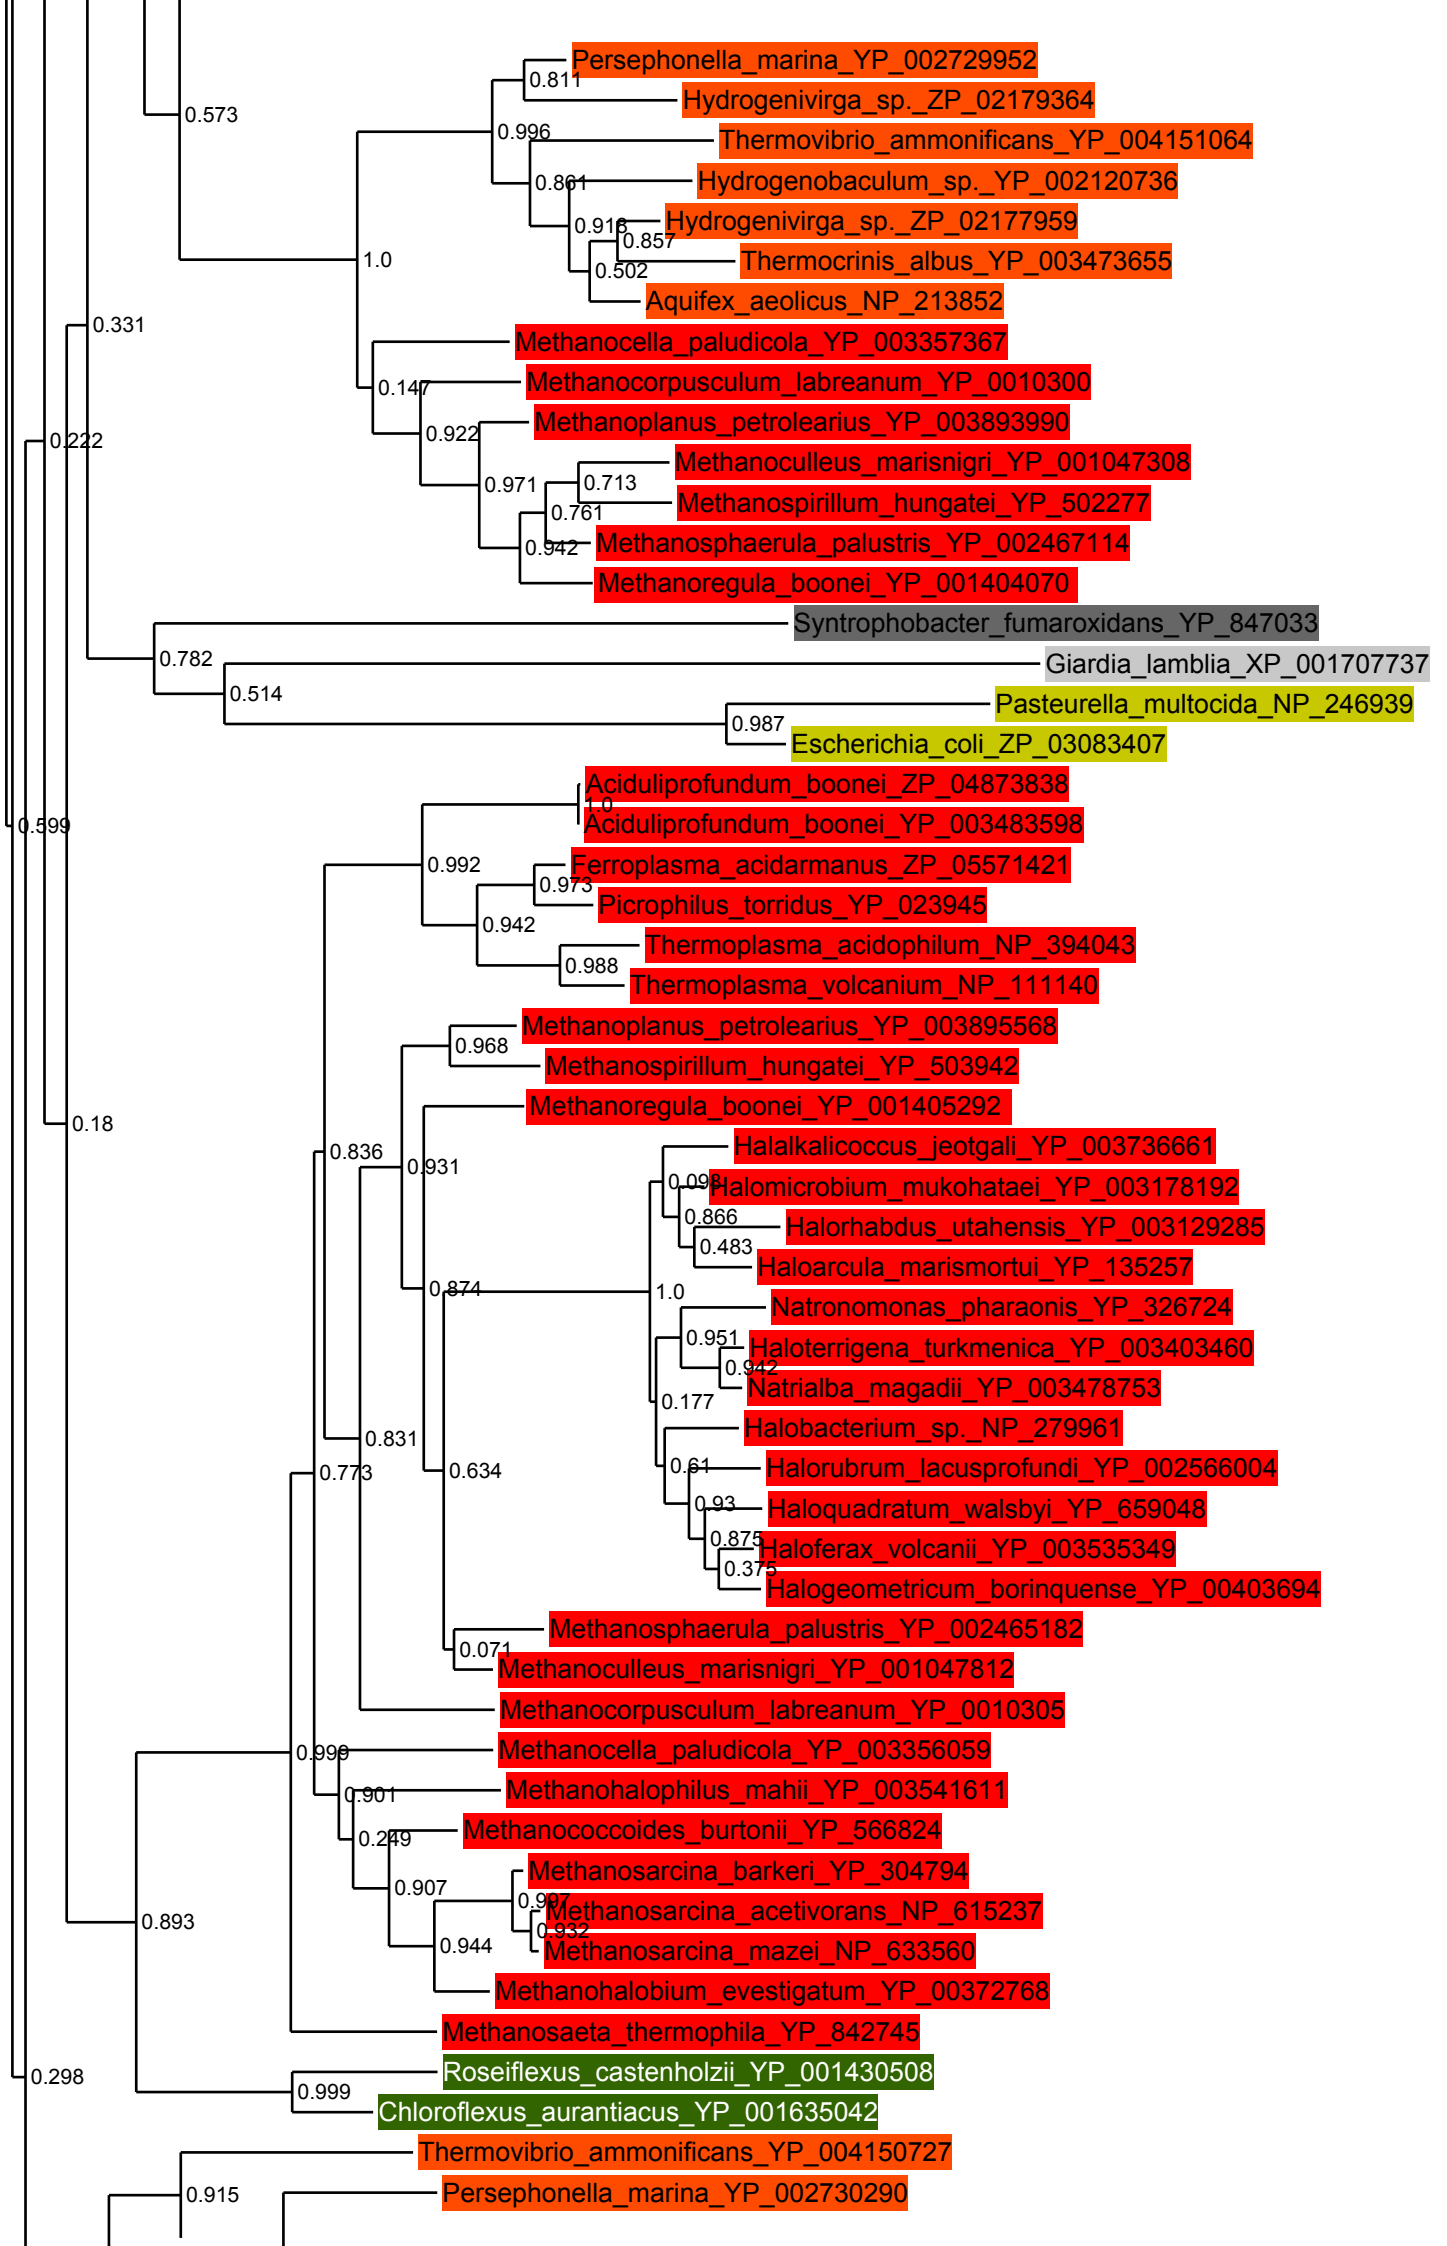

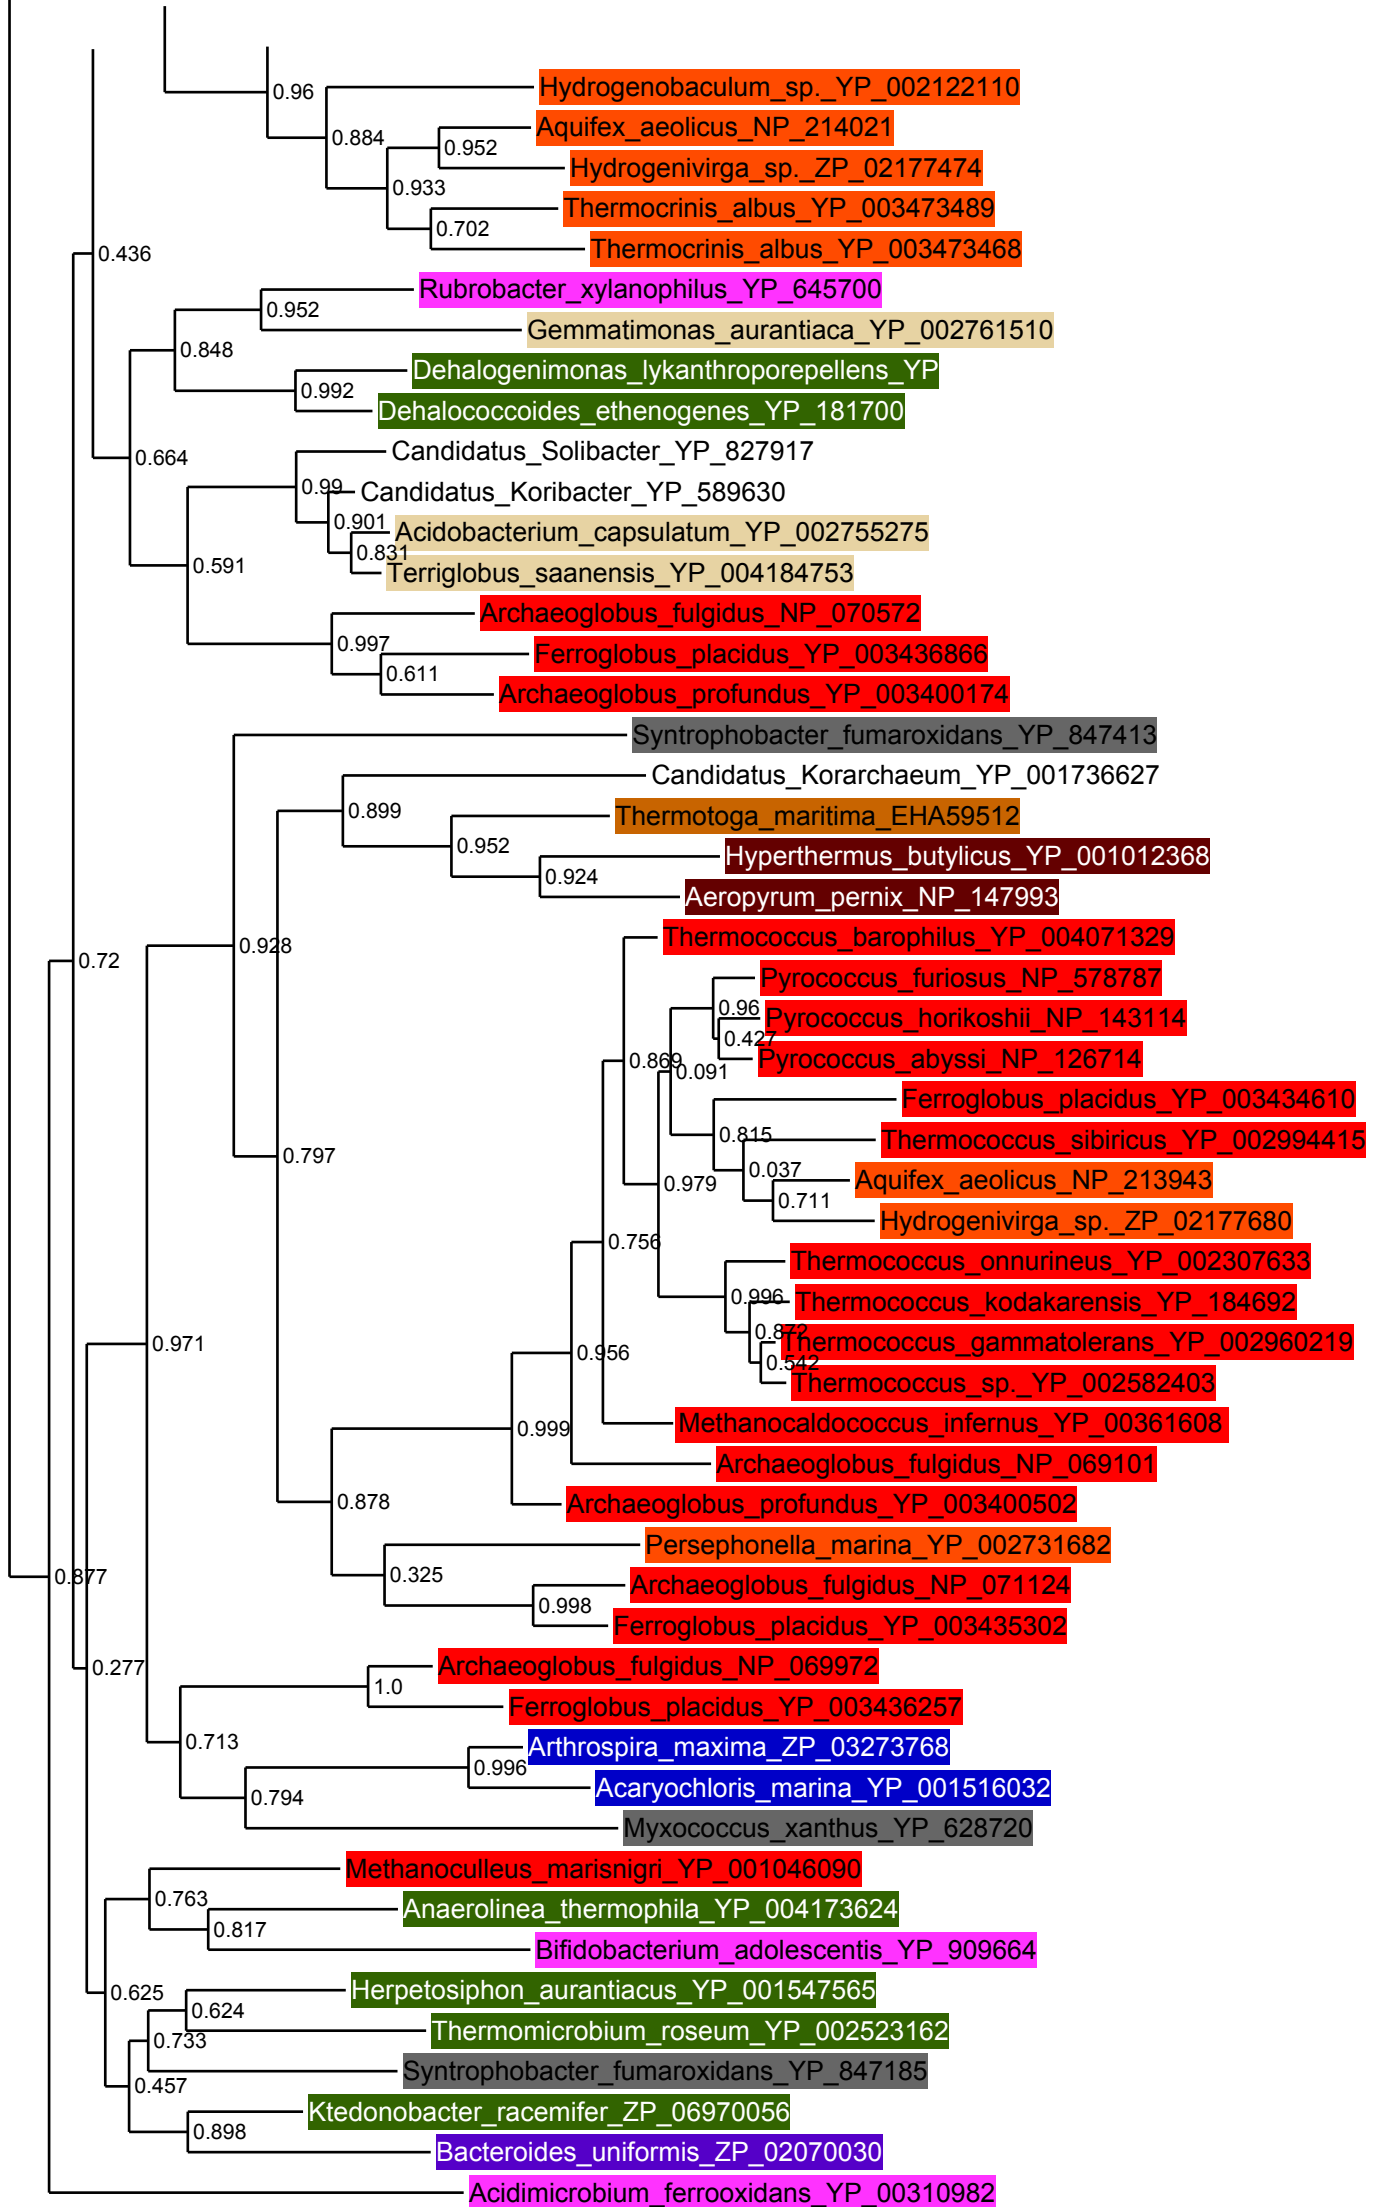

SUPPLEMENTARY FIGURE 7: Phylogenetic tree of geranylgeranyl reductases (GGR).

This tree was reconstructed using 317 representative sequences and 266 conserved sites.



Suppl. Figure 7.

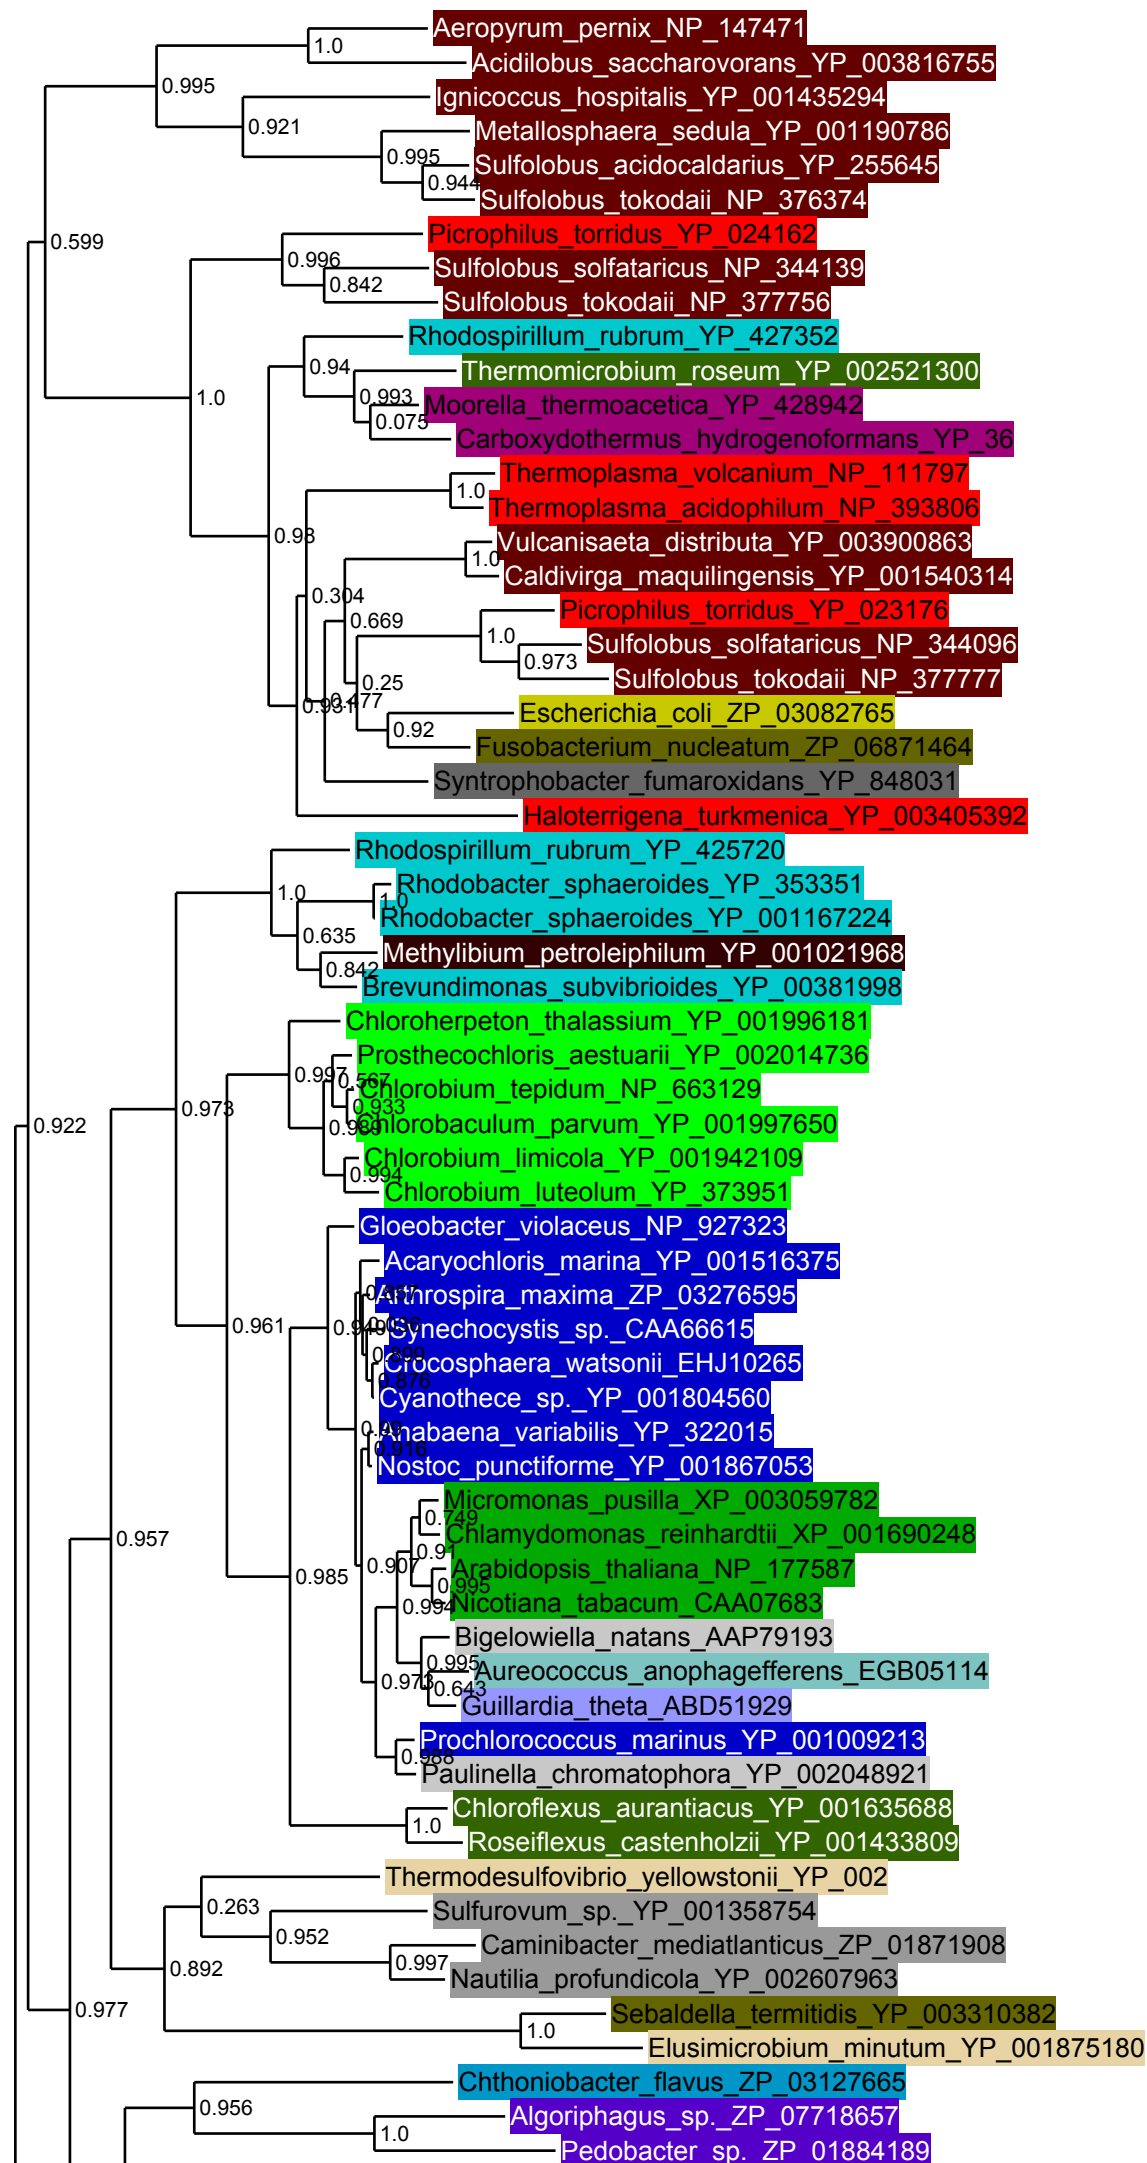

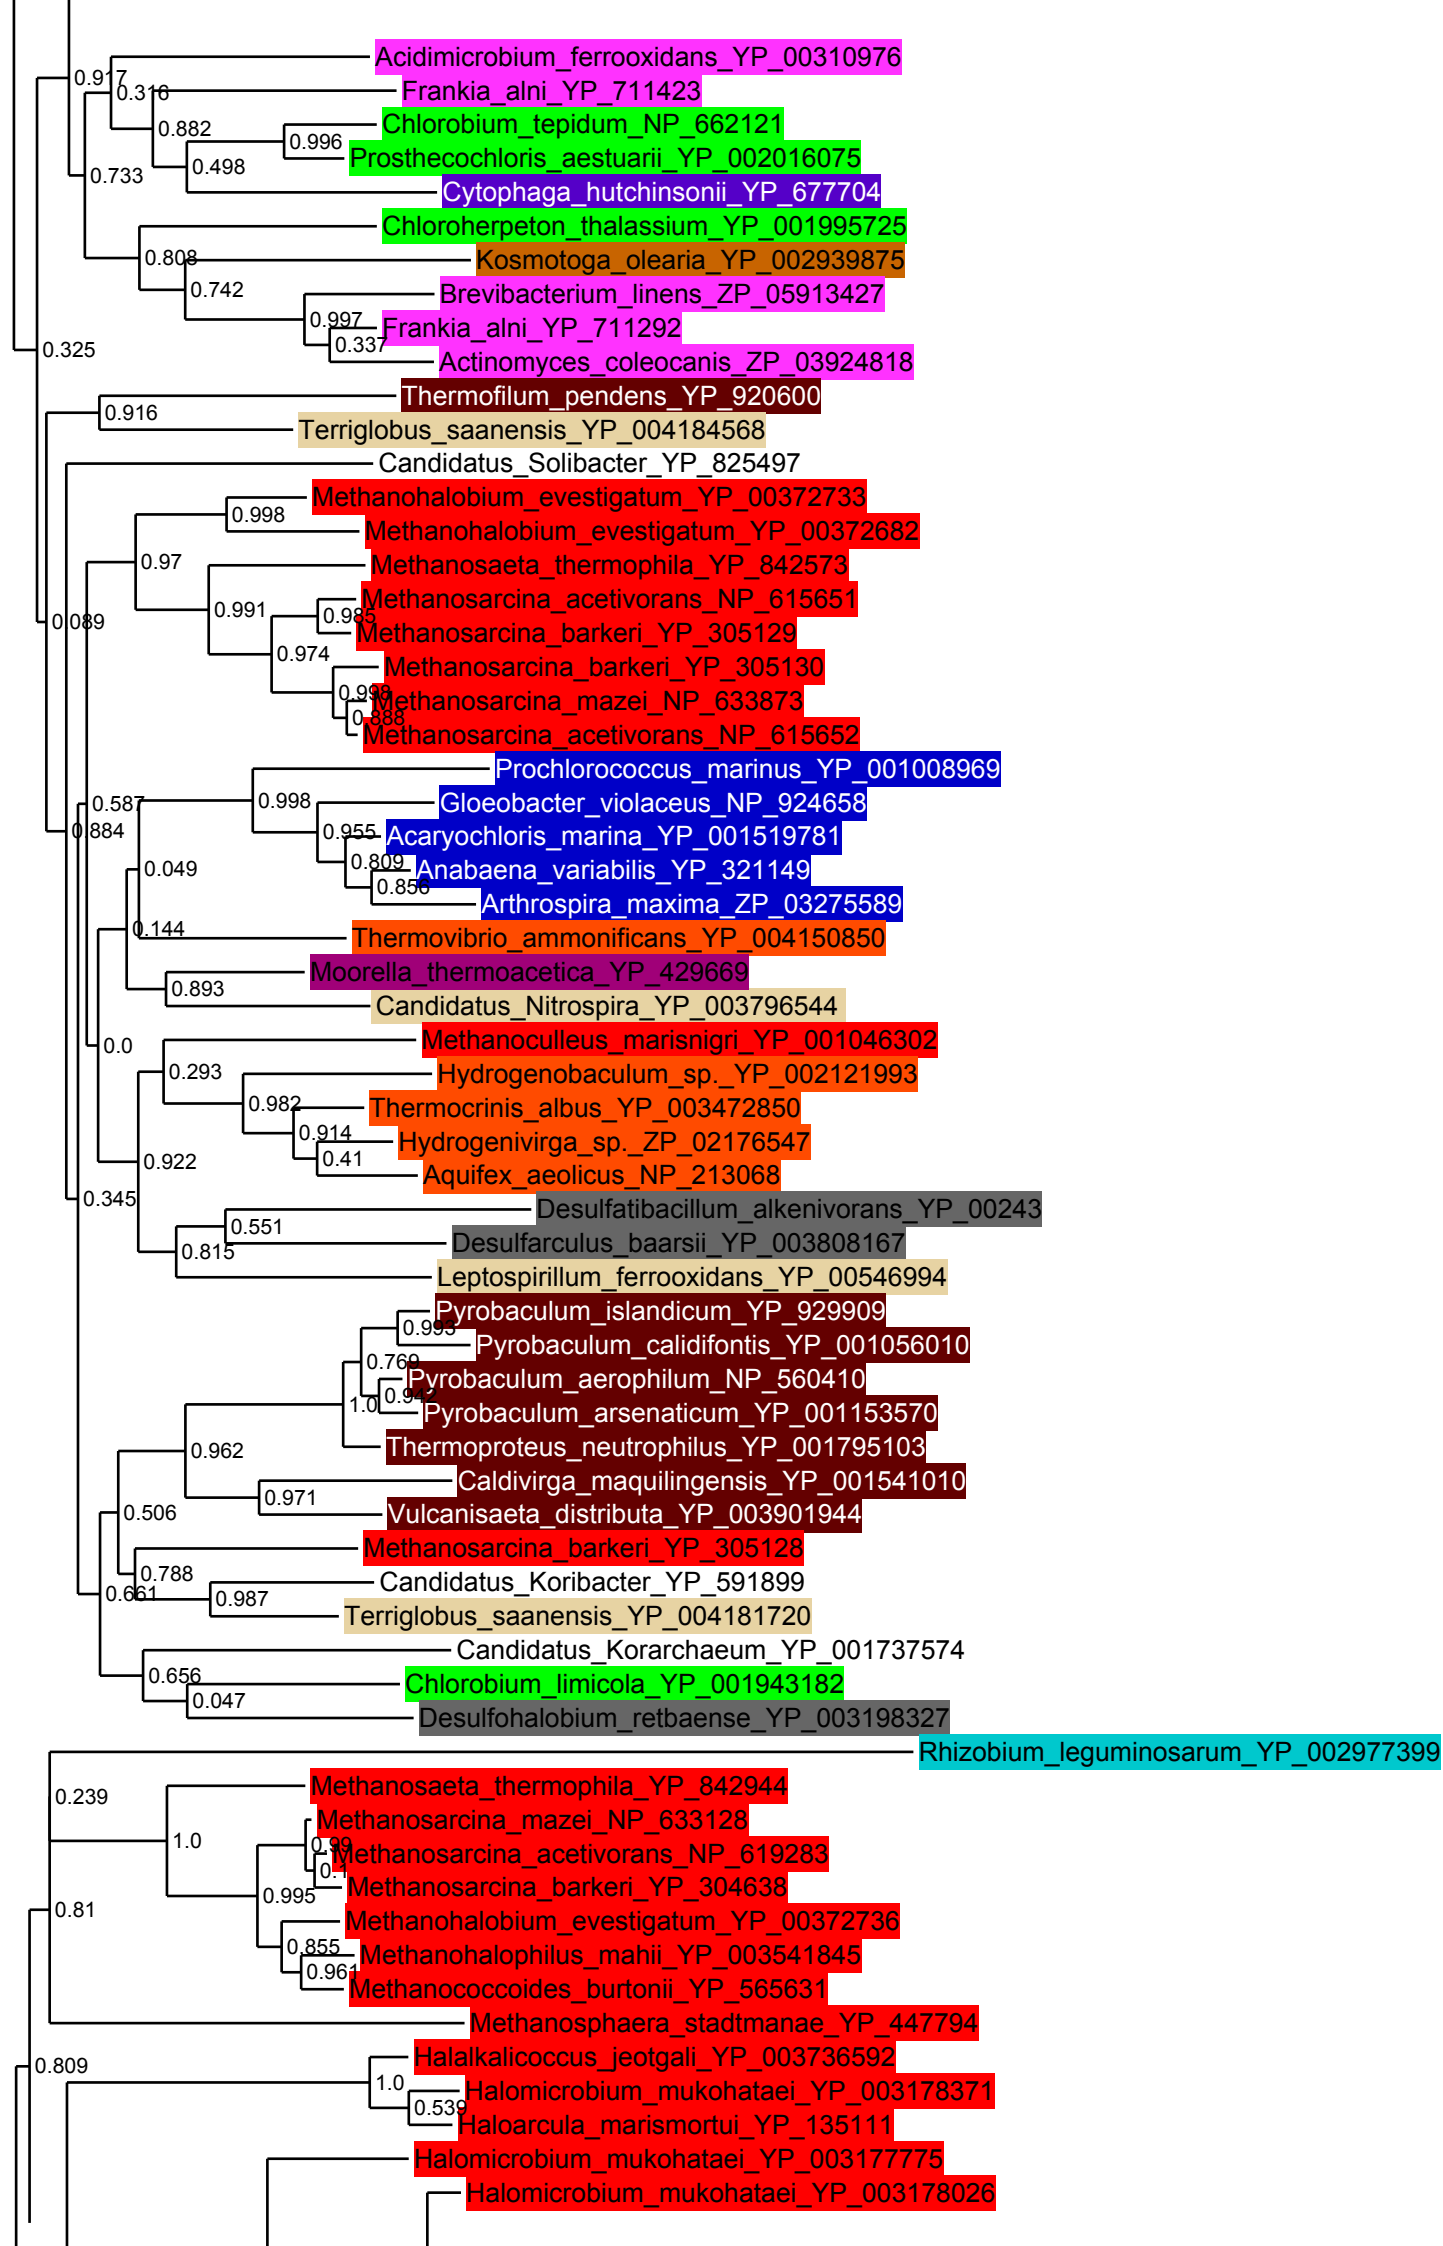

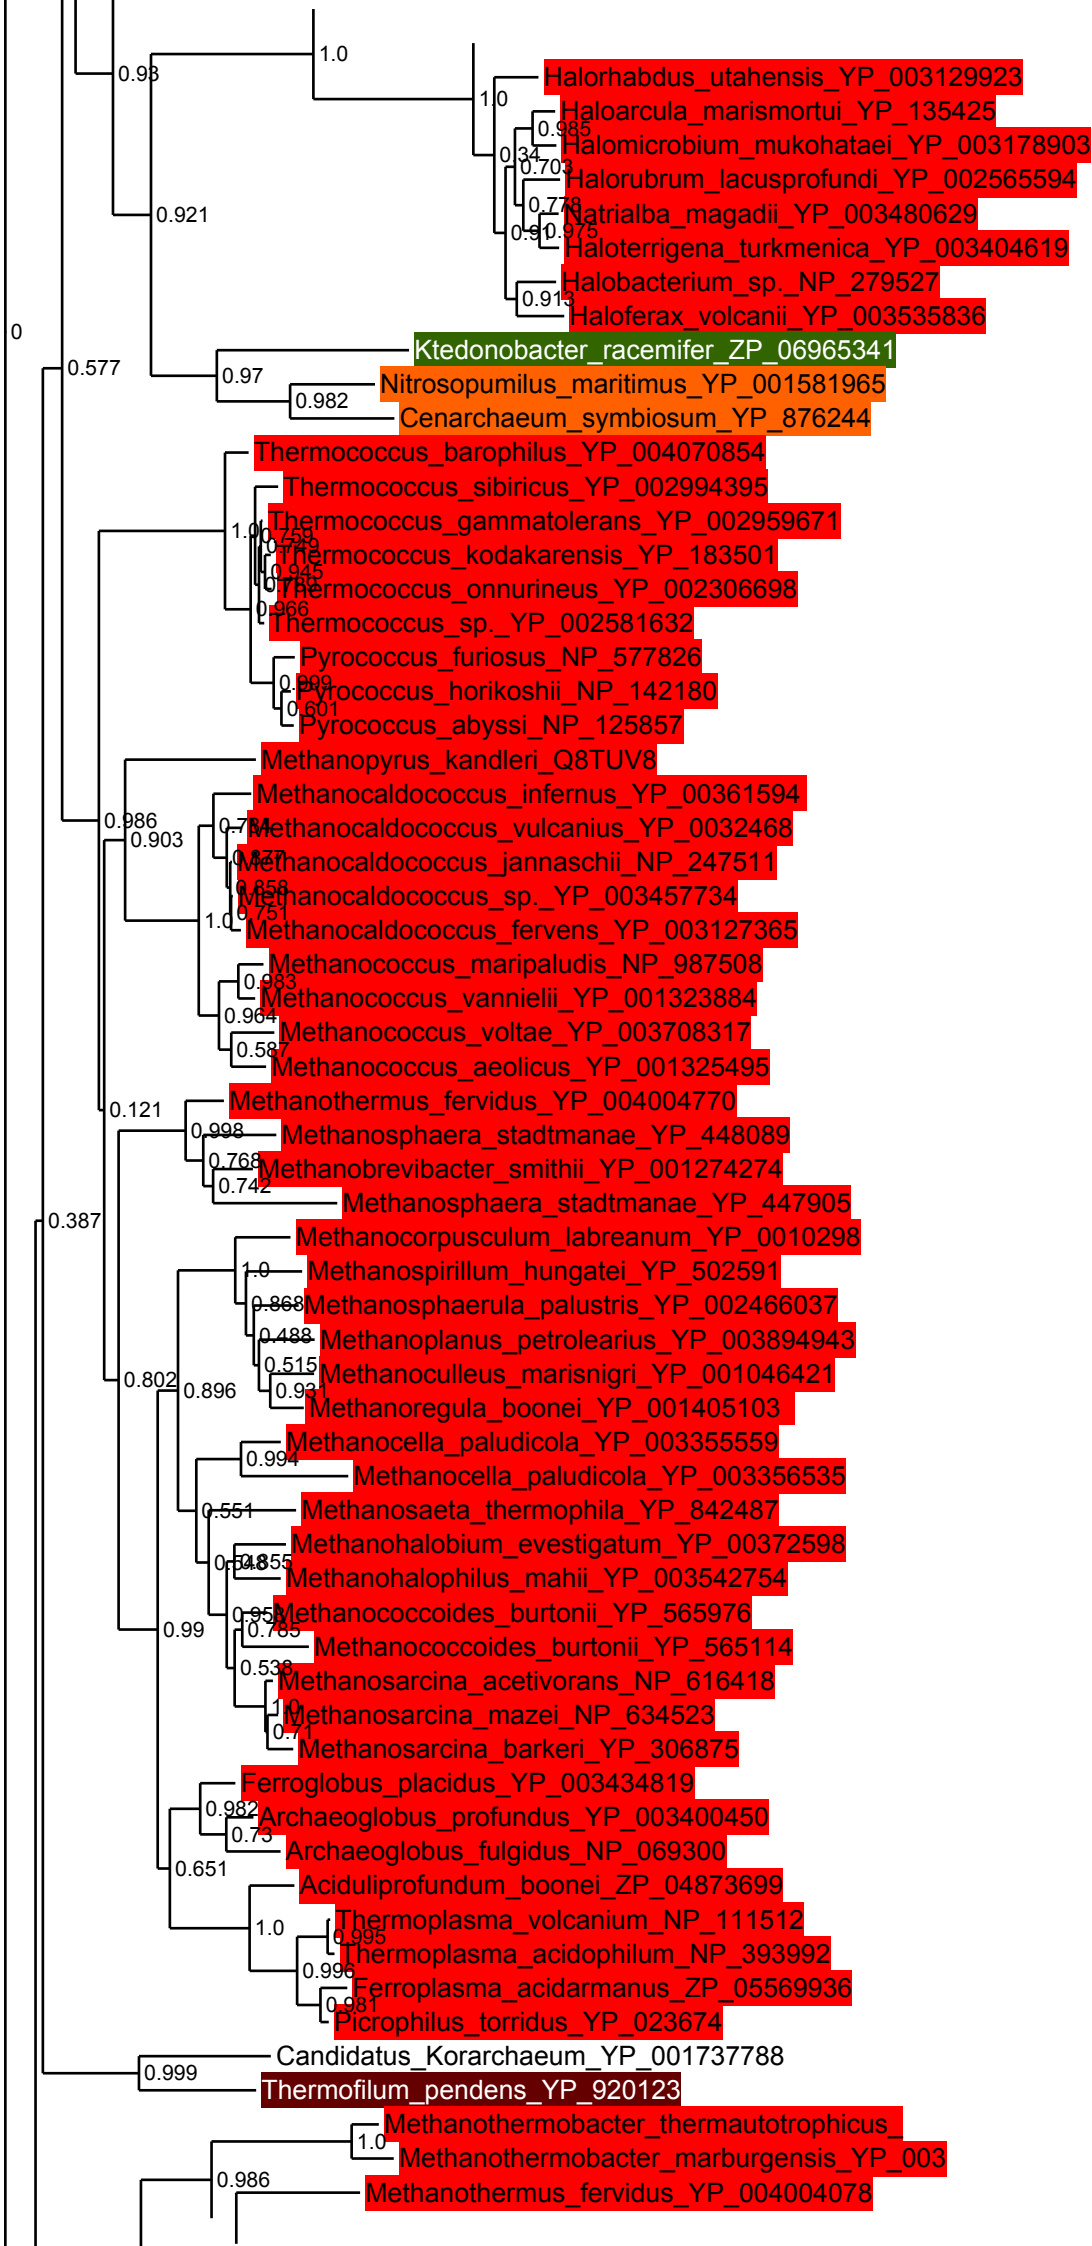

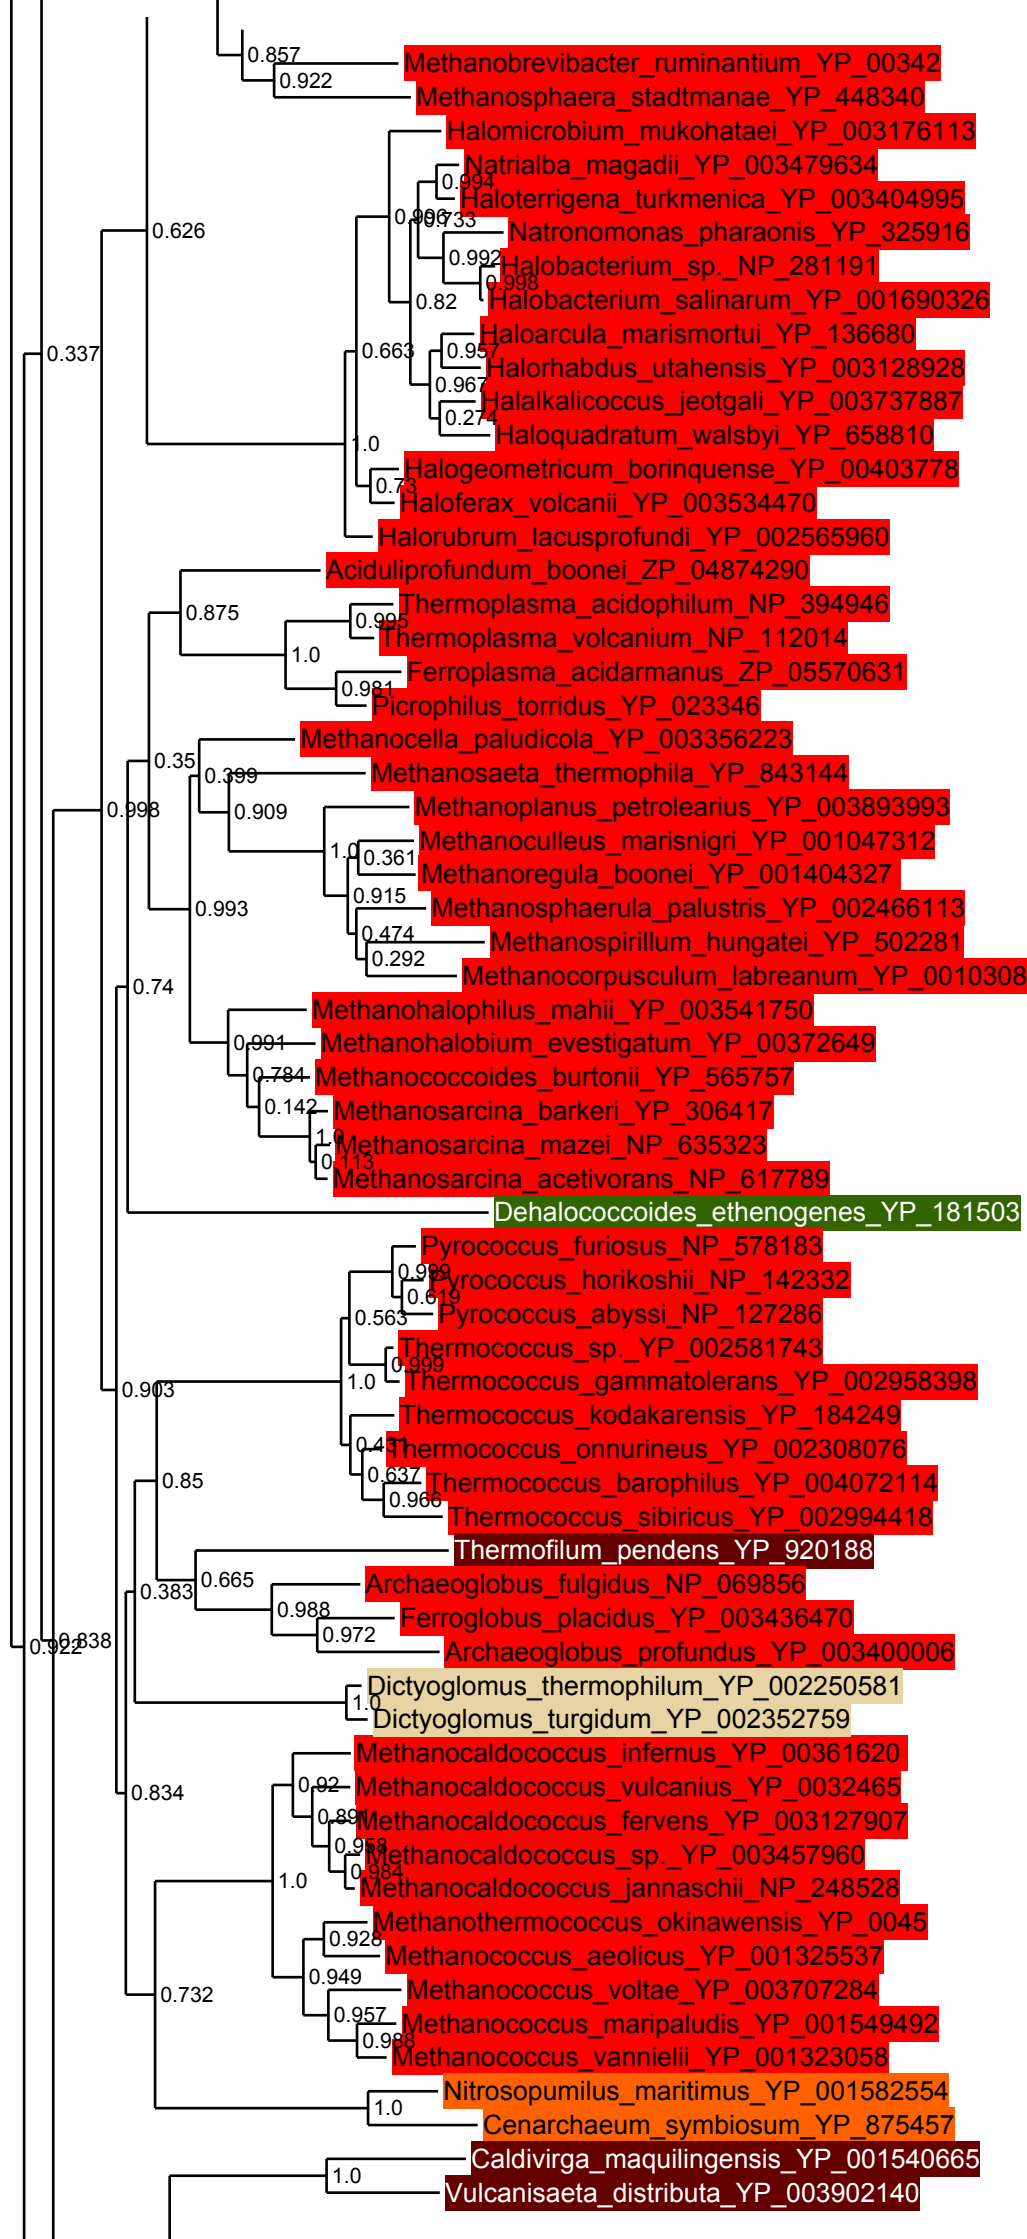

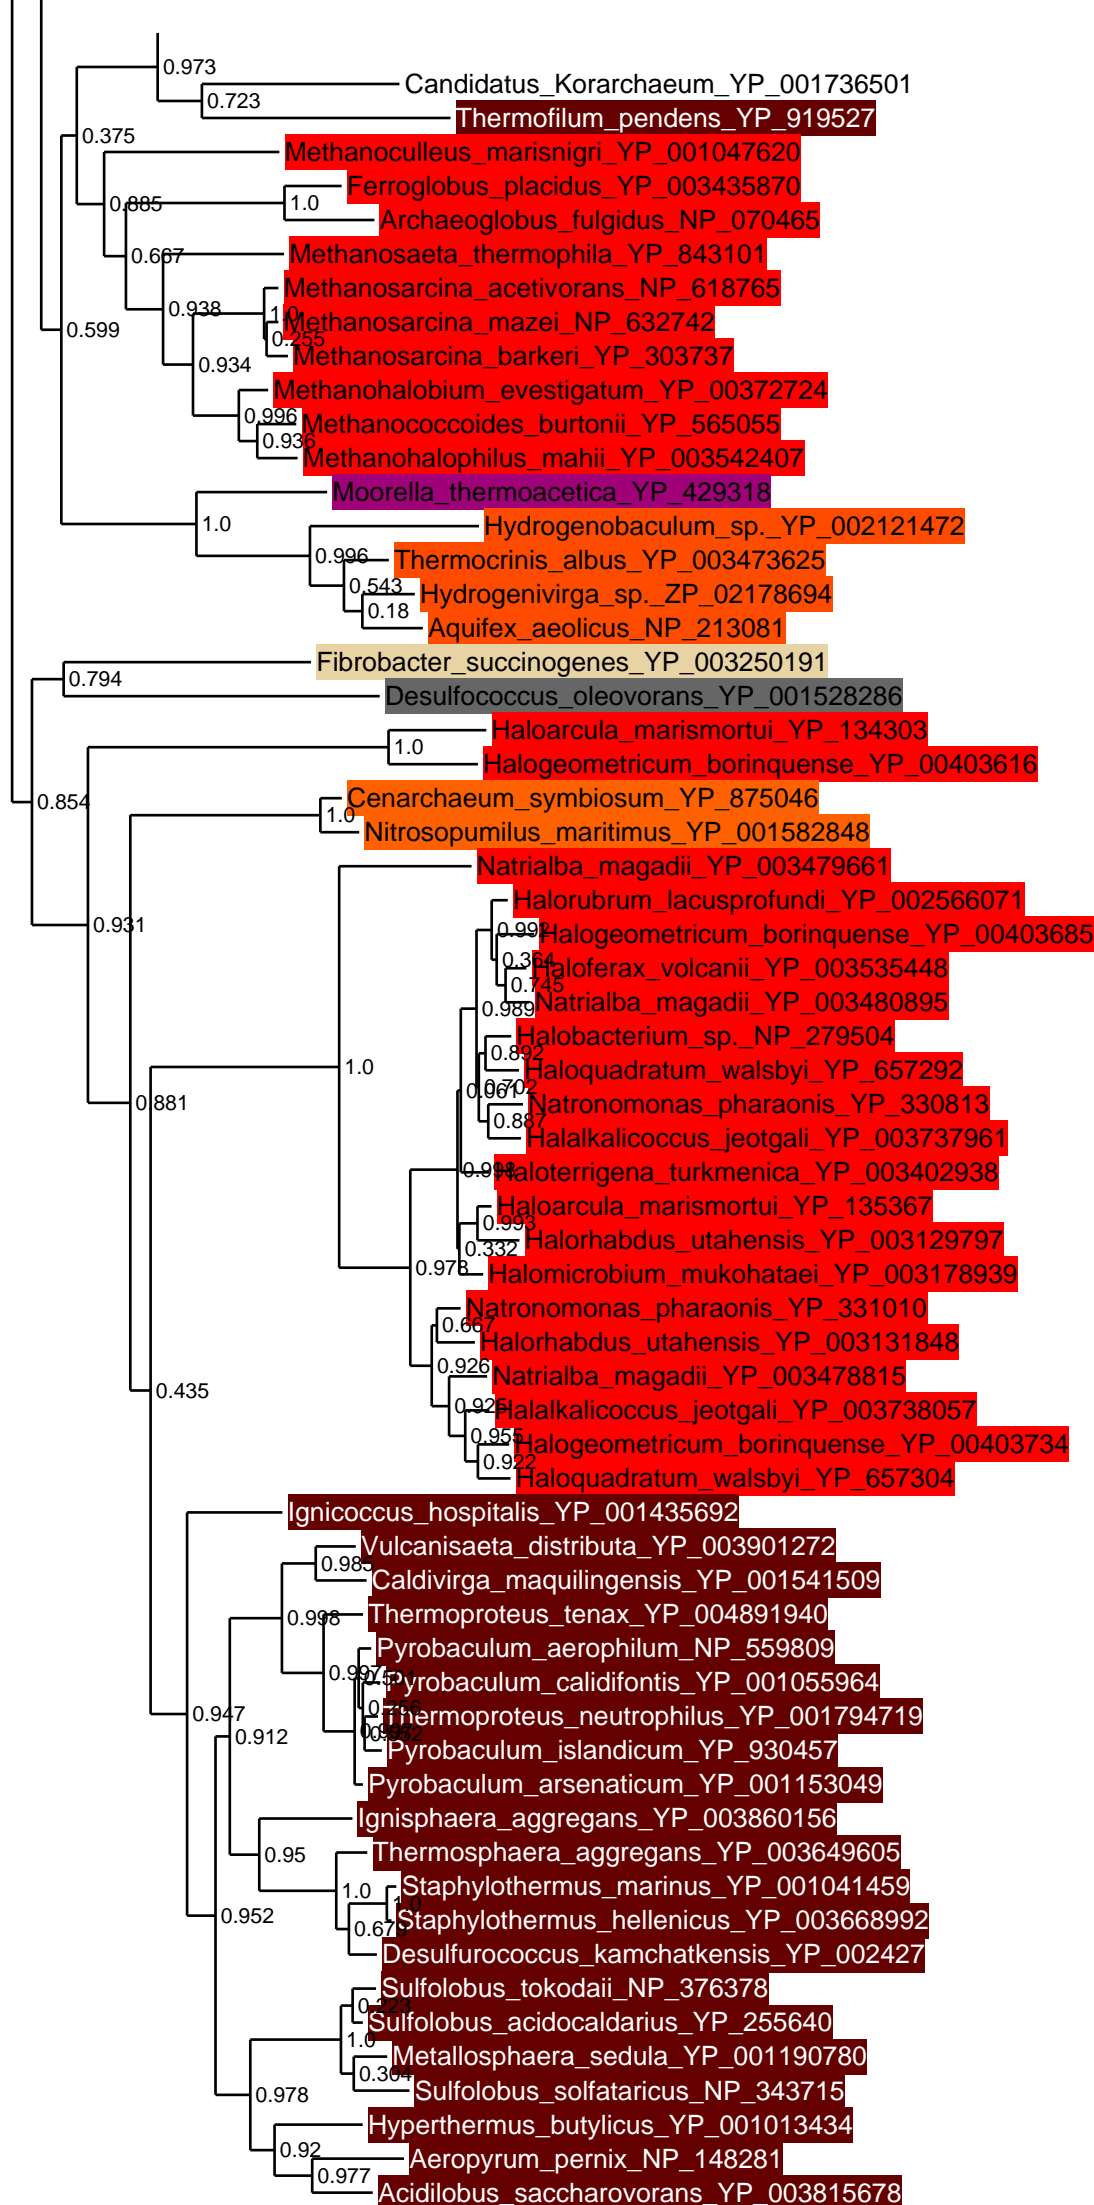

SUPPLEMENTARY FIGURE 8: Phylogenetic tree of CDP diglyceride synthases (CdsA).  
This tree was reconstructed using 133 representative sequences and 87 conserved sites.

Suppl. Figure 8.

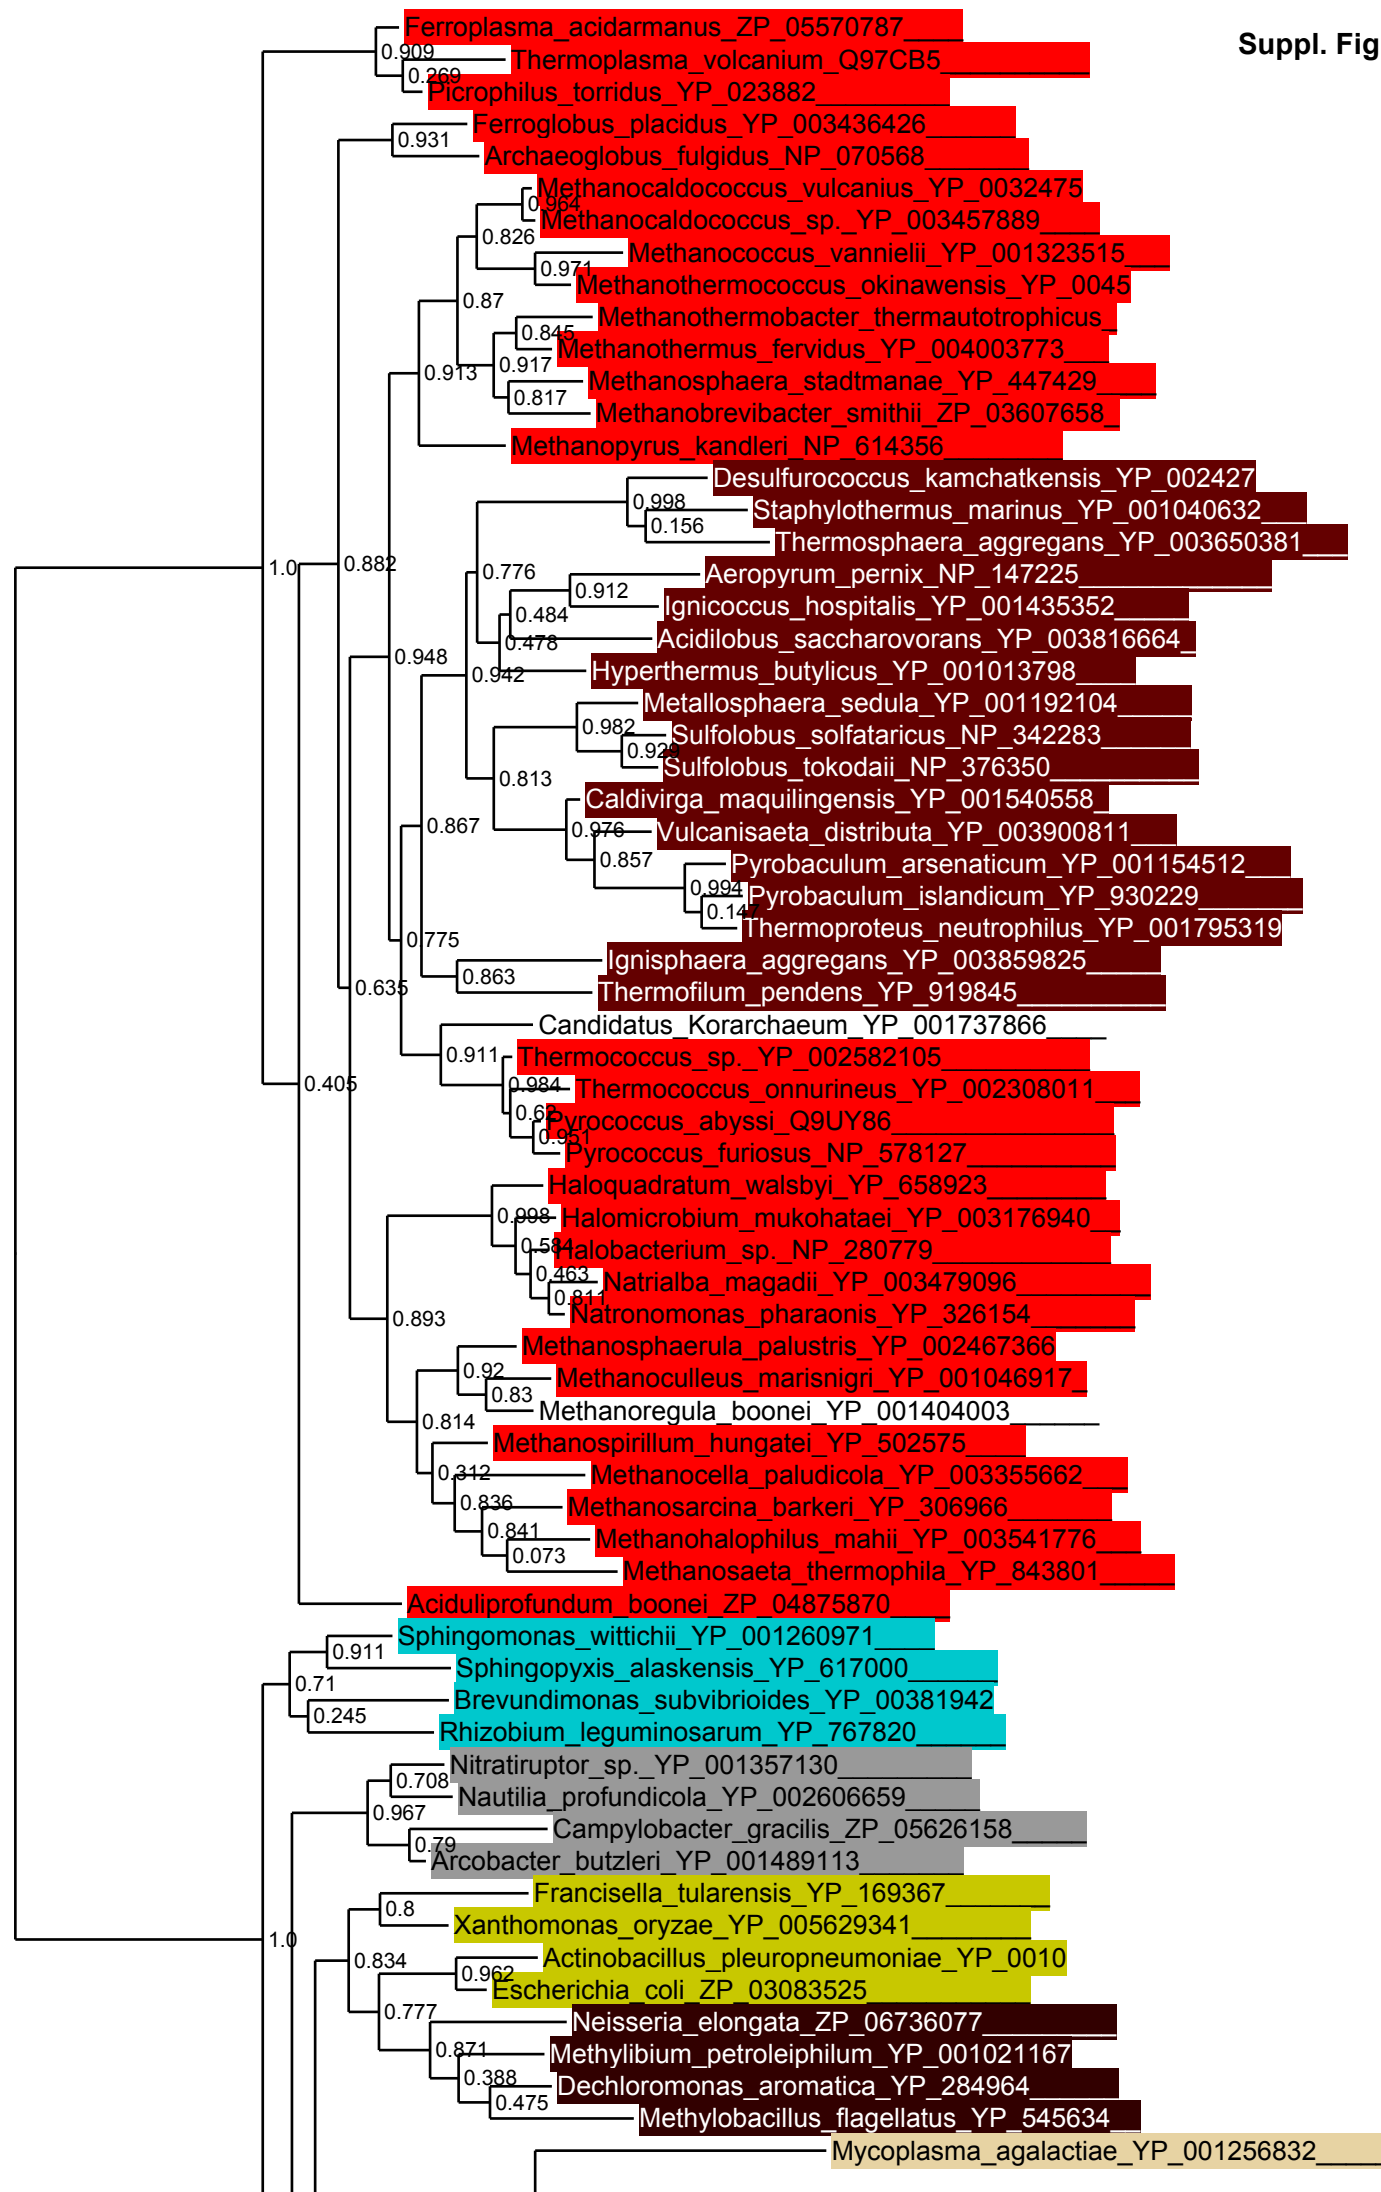



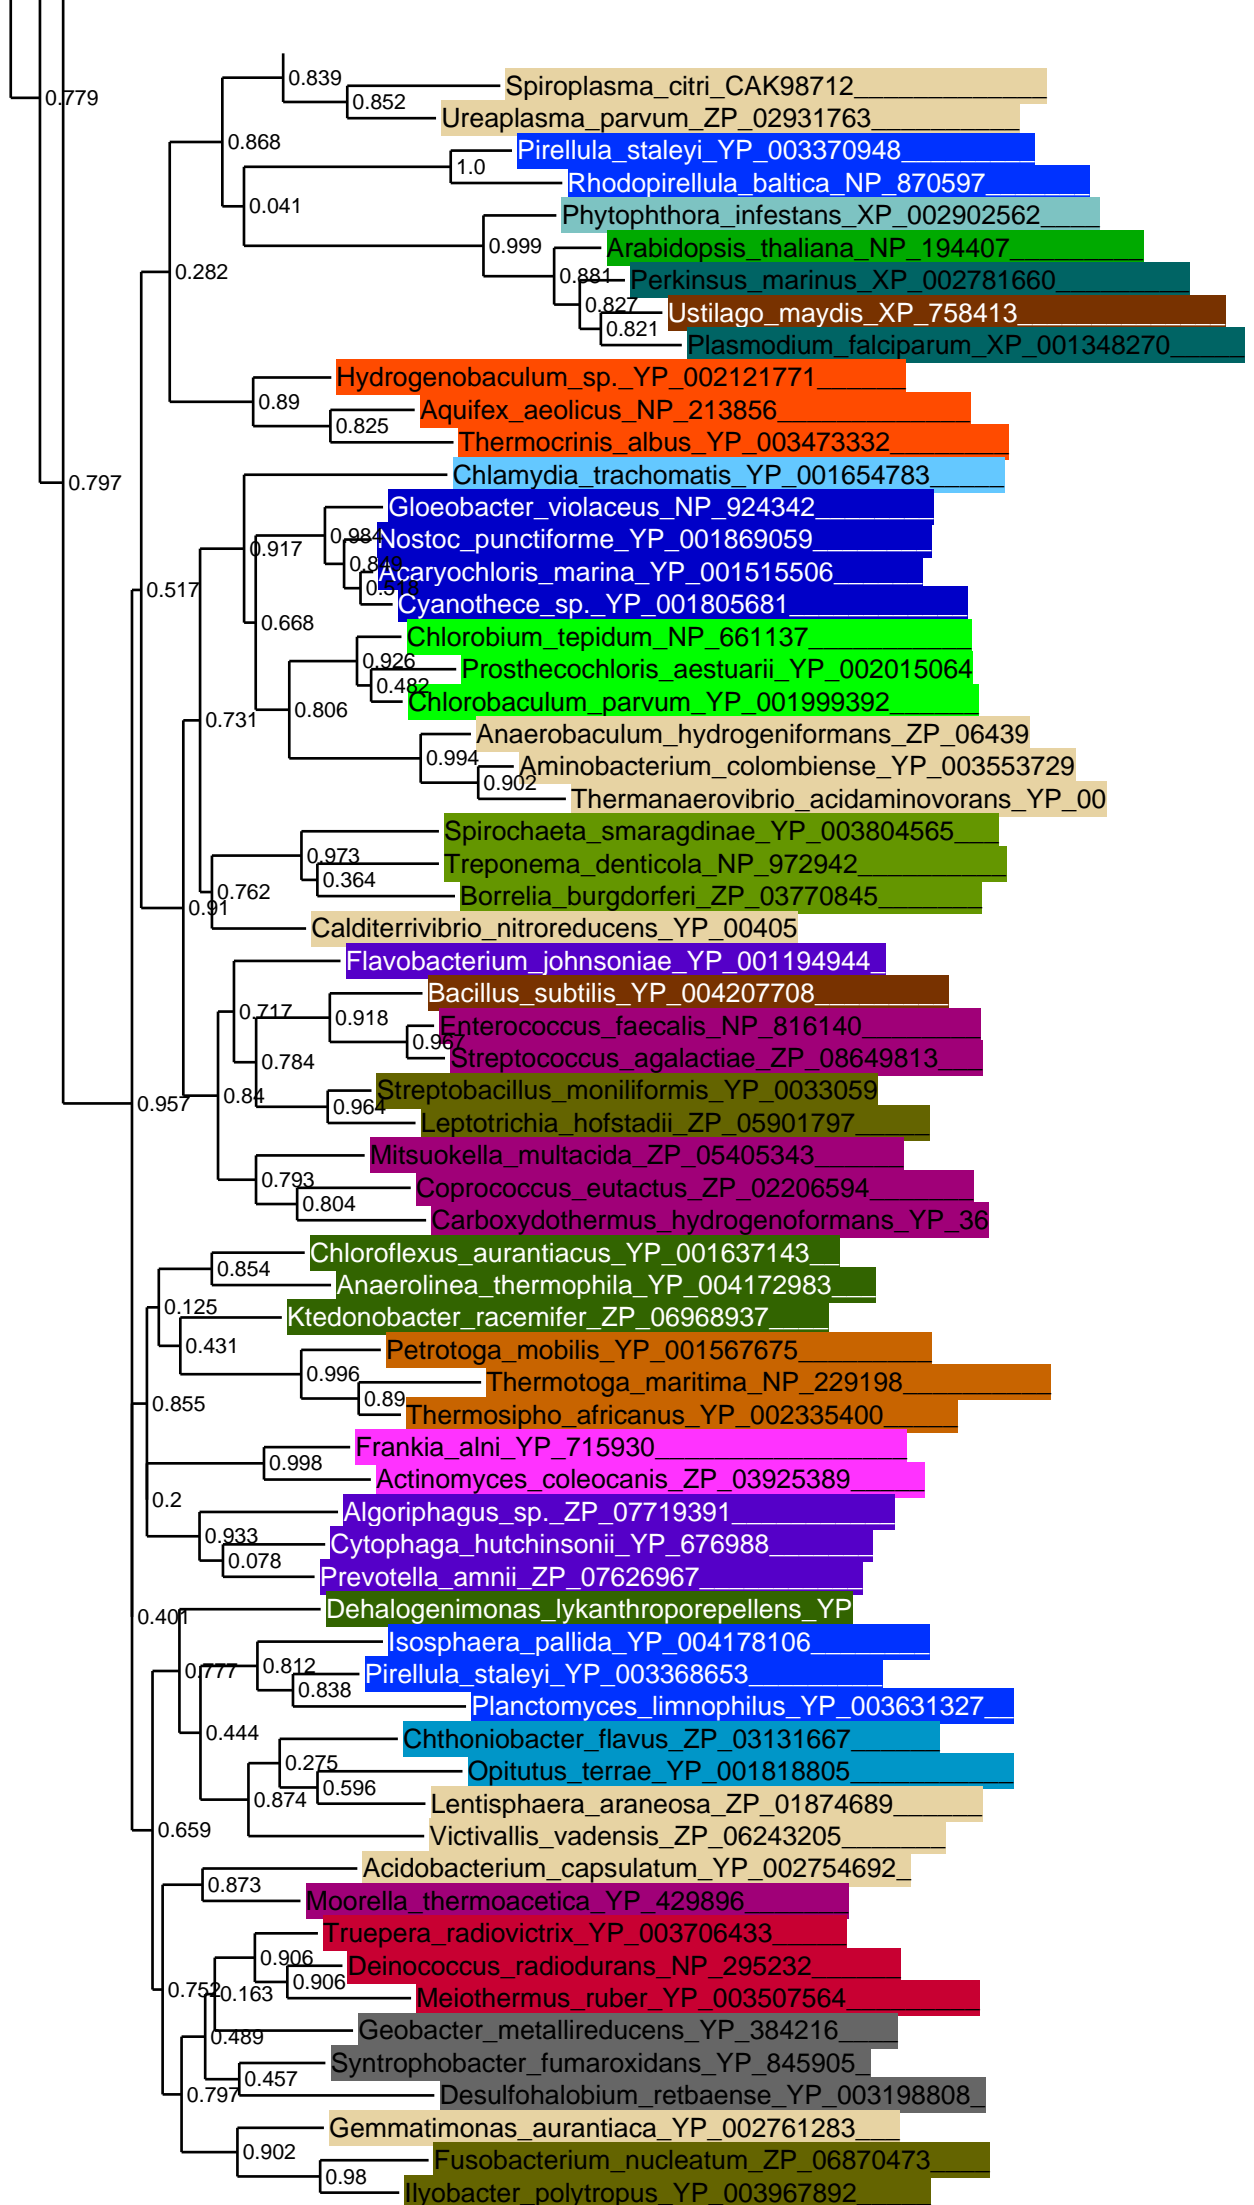

Supplement: f1 [file 630910.f1.pdf]
